# Supplementary material for: Simple and efficient synthesis of tetrahydro-β-carbolines via the Pictet–Spengler reaction in 1,1,1,3,3,3-hexafluoro-2-propanol (HFIP)
Source: Royal Society of Chemistry journal article supplement (doi:10.1039/c4ra03628j), 2014-01-01

## Supporting Information

### Simple and Efficient Synthesis of Tetrahydro- $\beta$ -Carbolines via the Pictet–Spengler Reaction in 1,1,1,3,3,3-Hexafluoro-2-Propanol (HFIP)

Li-Na Wang, Su-Li Shen, and Jin Qu\*

State Key Laboratory of Elemento-Organic Chemistry, Synergetic Innovation Center of Chemical Science and Engineering (Tianjin), Nankai University, Tianjin, 300071, China.

Fax: +86-(022)-23505521 and E-mail: [qujin@nankai.edu.cn](mailto:qujin@nankai.edu.cn)

|                   |    |
|-------------------|----|
| NMR spectra.....  | 1  |
| HRMS spectra..... | 67 |

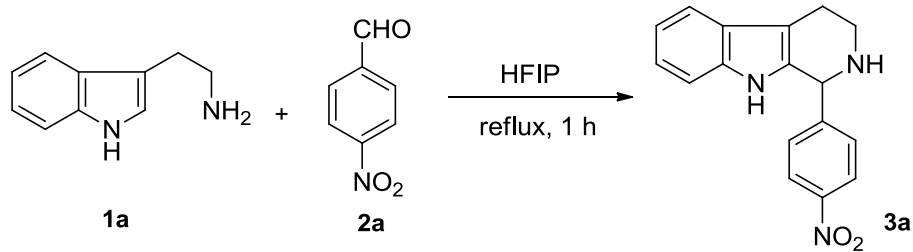

The  $^1\text{H}$  NMR spectrum of the crude product after removal of solvent HFIP.

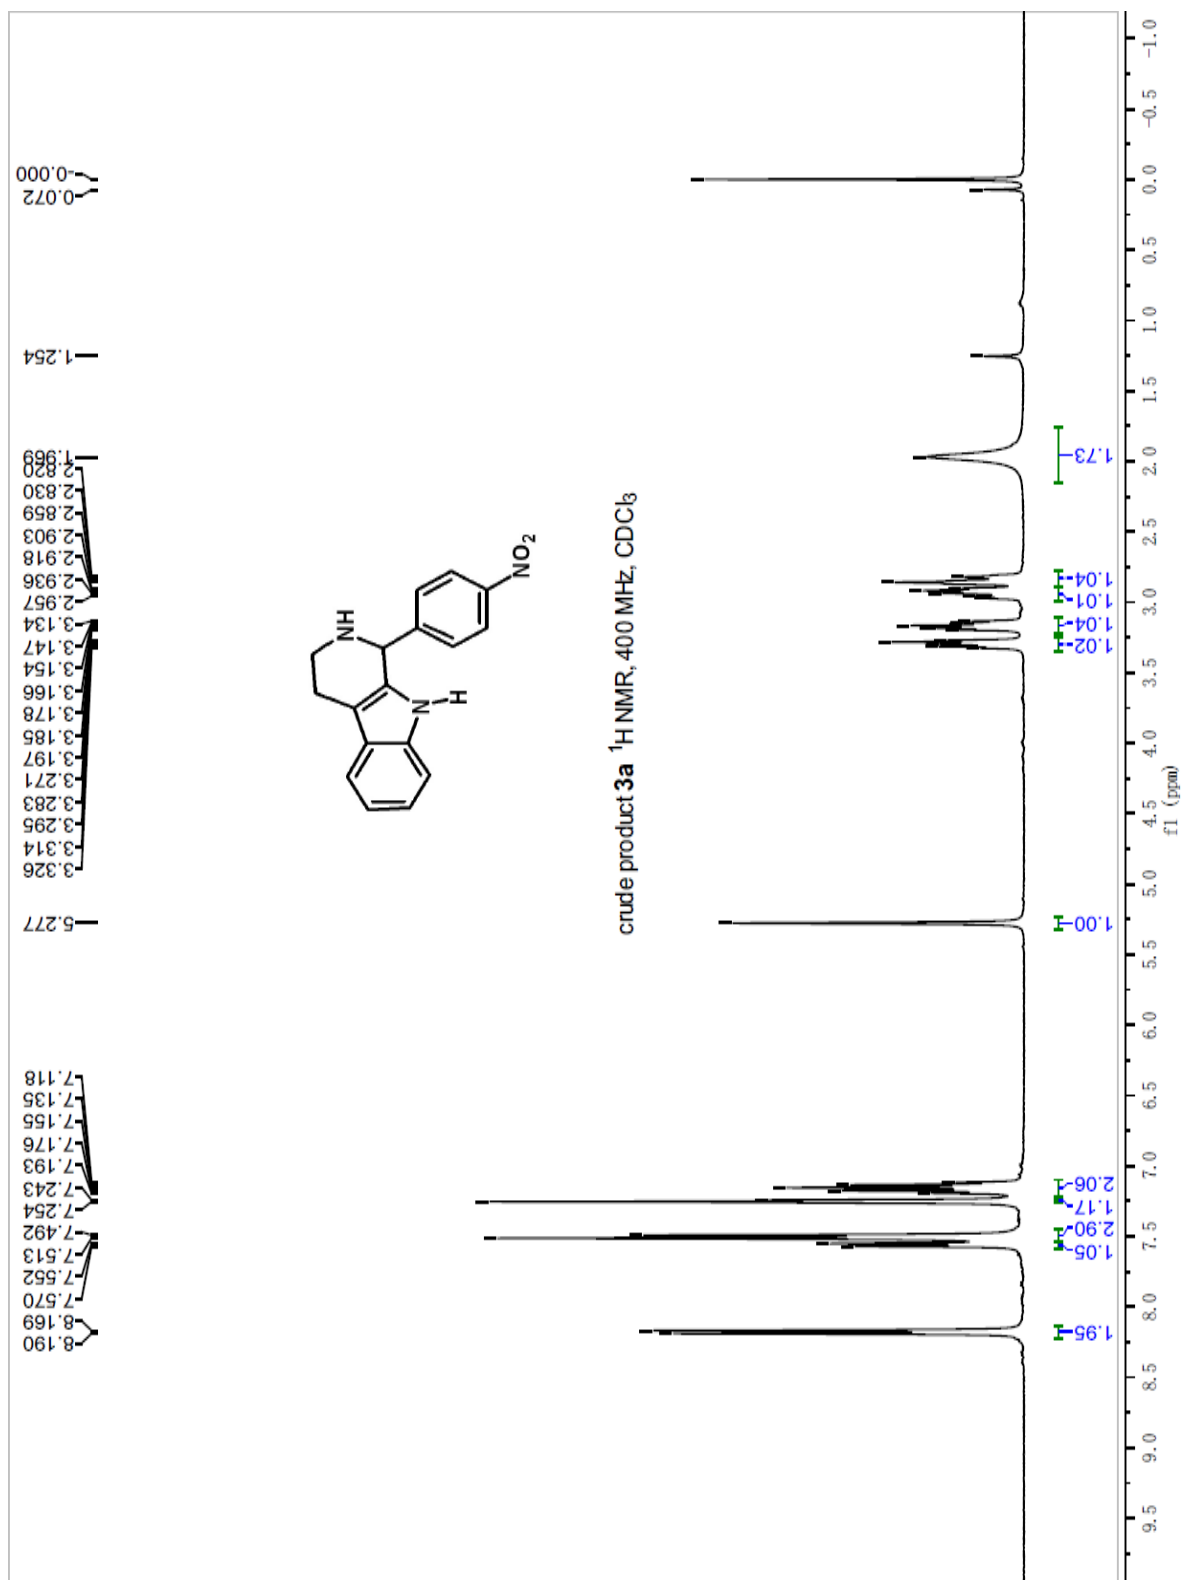

# NMR spectra

## 1-(4-Nitrophenyl)-1,2,3,4-tetrahydro- $\beta$ -carboline (3a): $^1\text{H}$ NMR

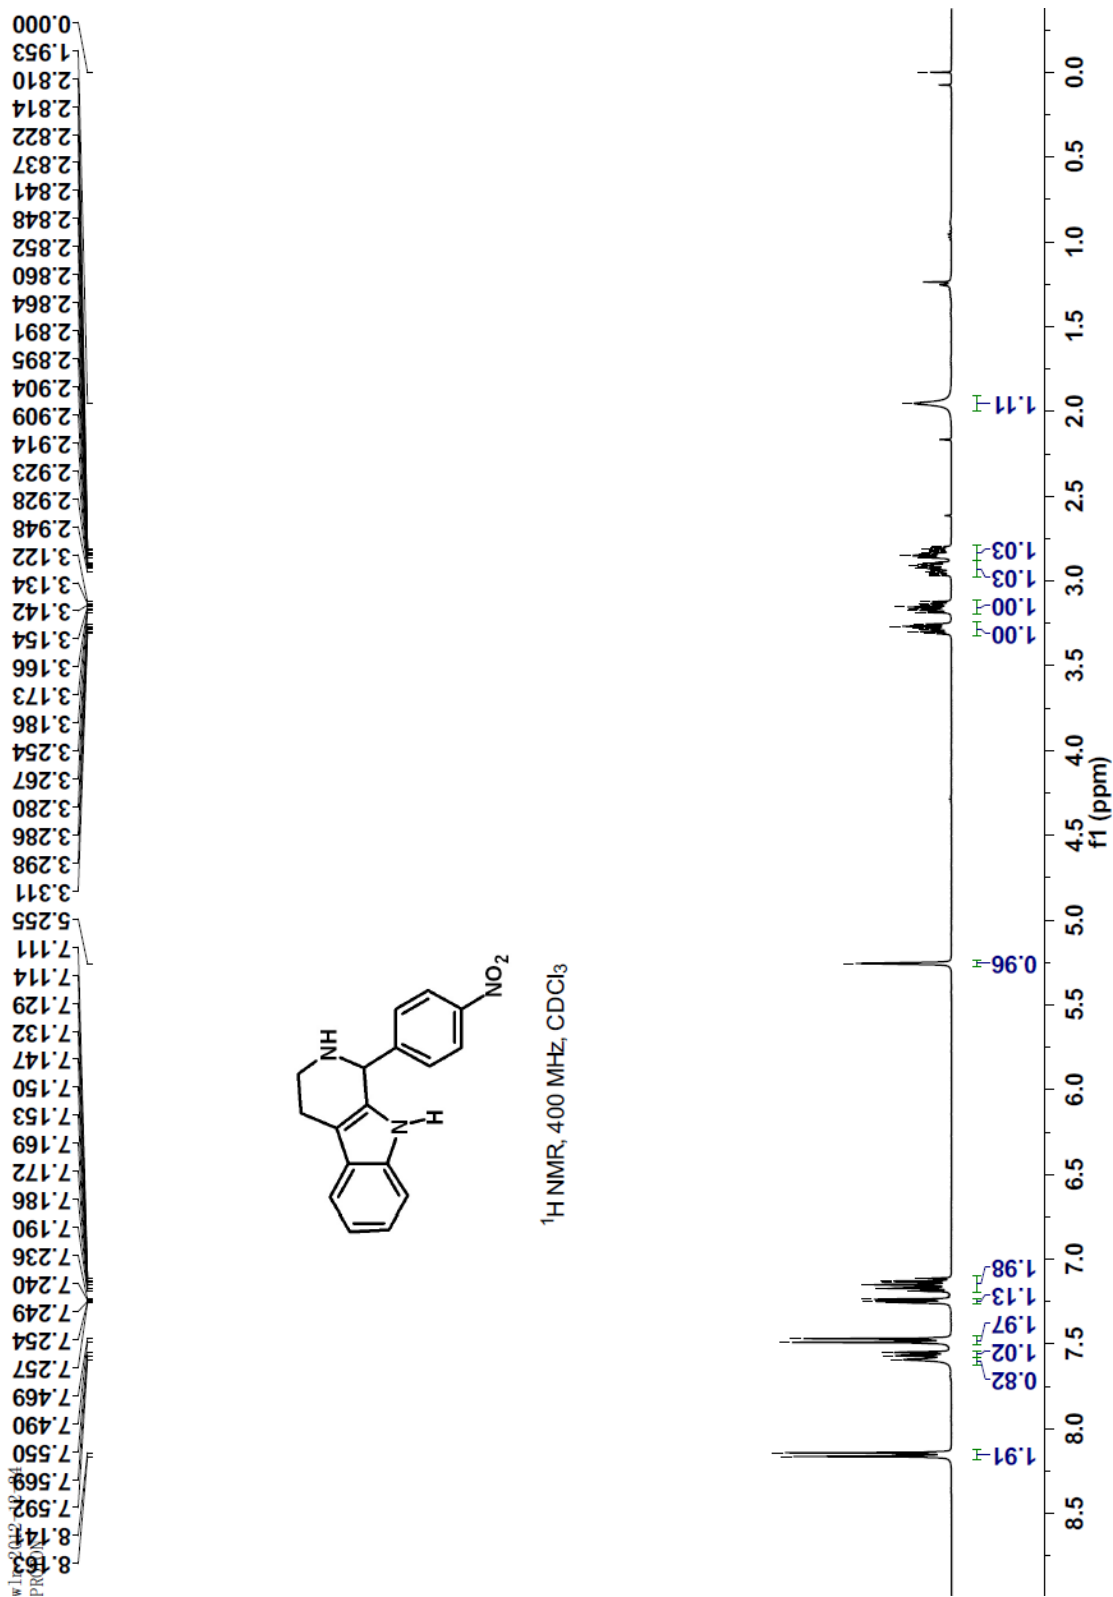

# 1-(4-Nitrophenyl)-1,2,3,4-tetrahydro-β-carboline (3a): <sup>13</sup>C NMR

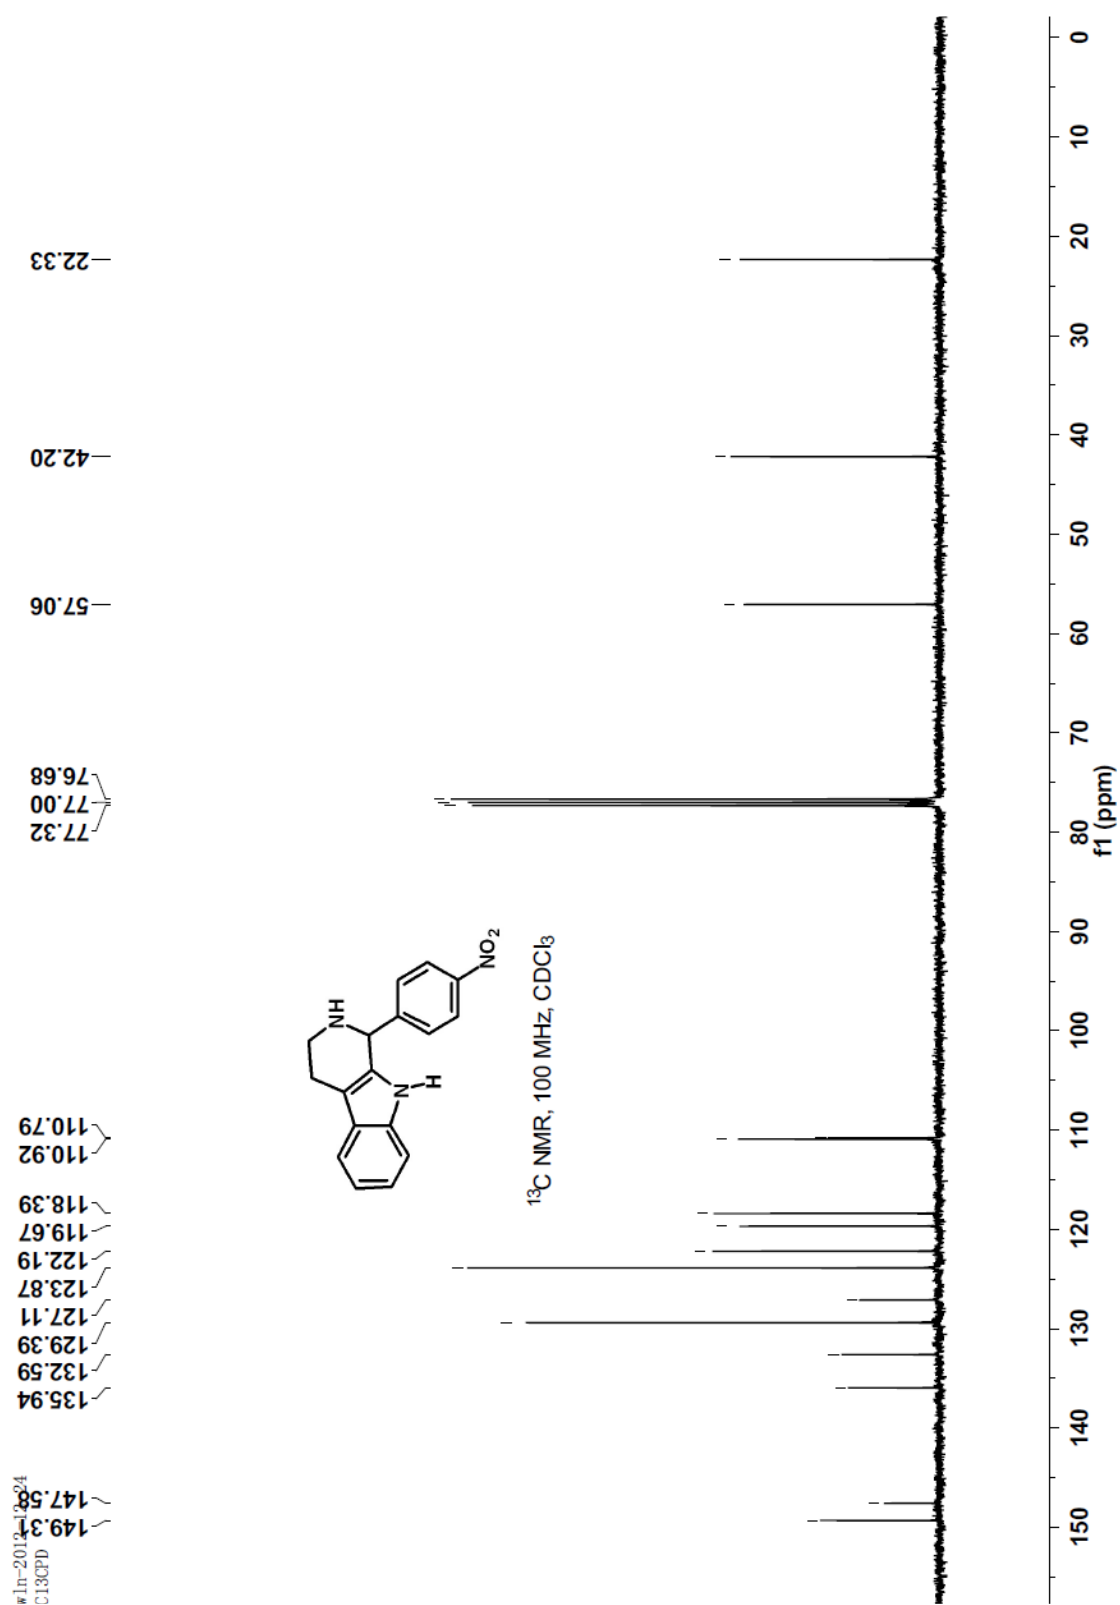

# 1-Phenyl-1,2,3,4-tetrahydro- $\beta$ -carboline (3b): $^1\text{H}$ NMR

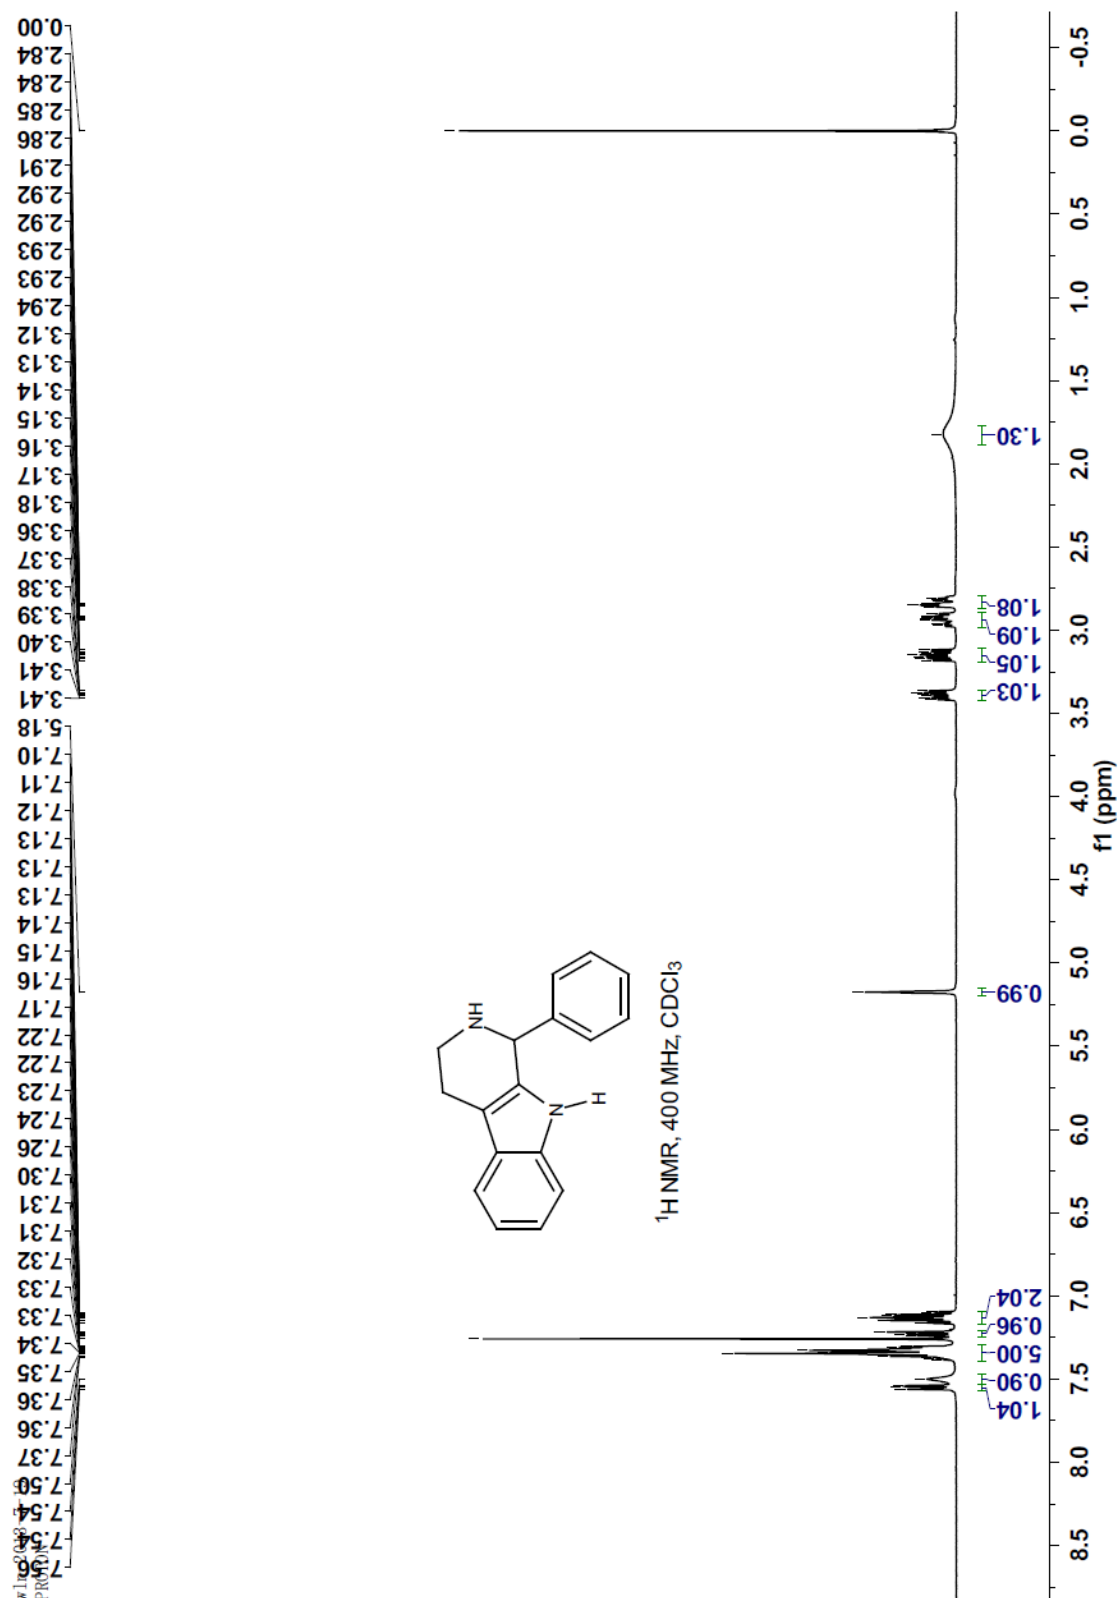

# 1-Phenyl-1,2,3,4-tetrahydro-β-carboline (3b): <sup>13</sup>C NMR

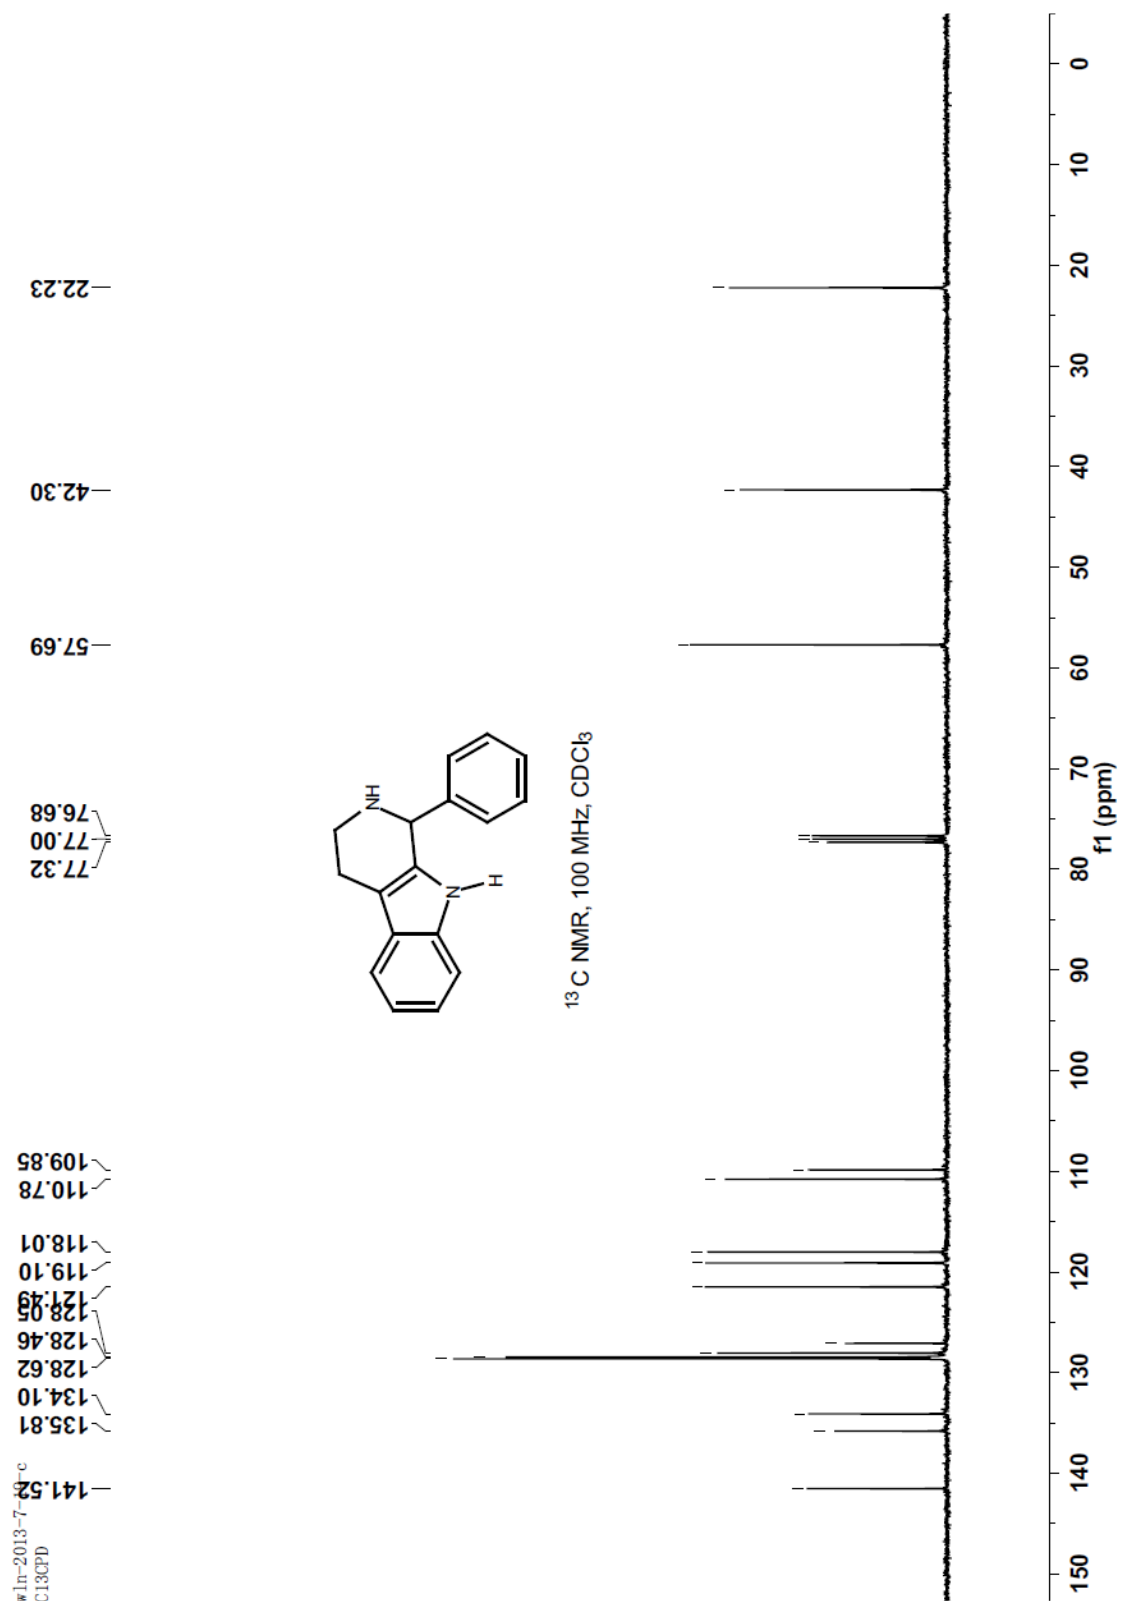

# 1-(4-Chlorophenyl)-1,2,3,4-tetrahydro-β-carboline (3c): <sup>1</sup>H NMR

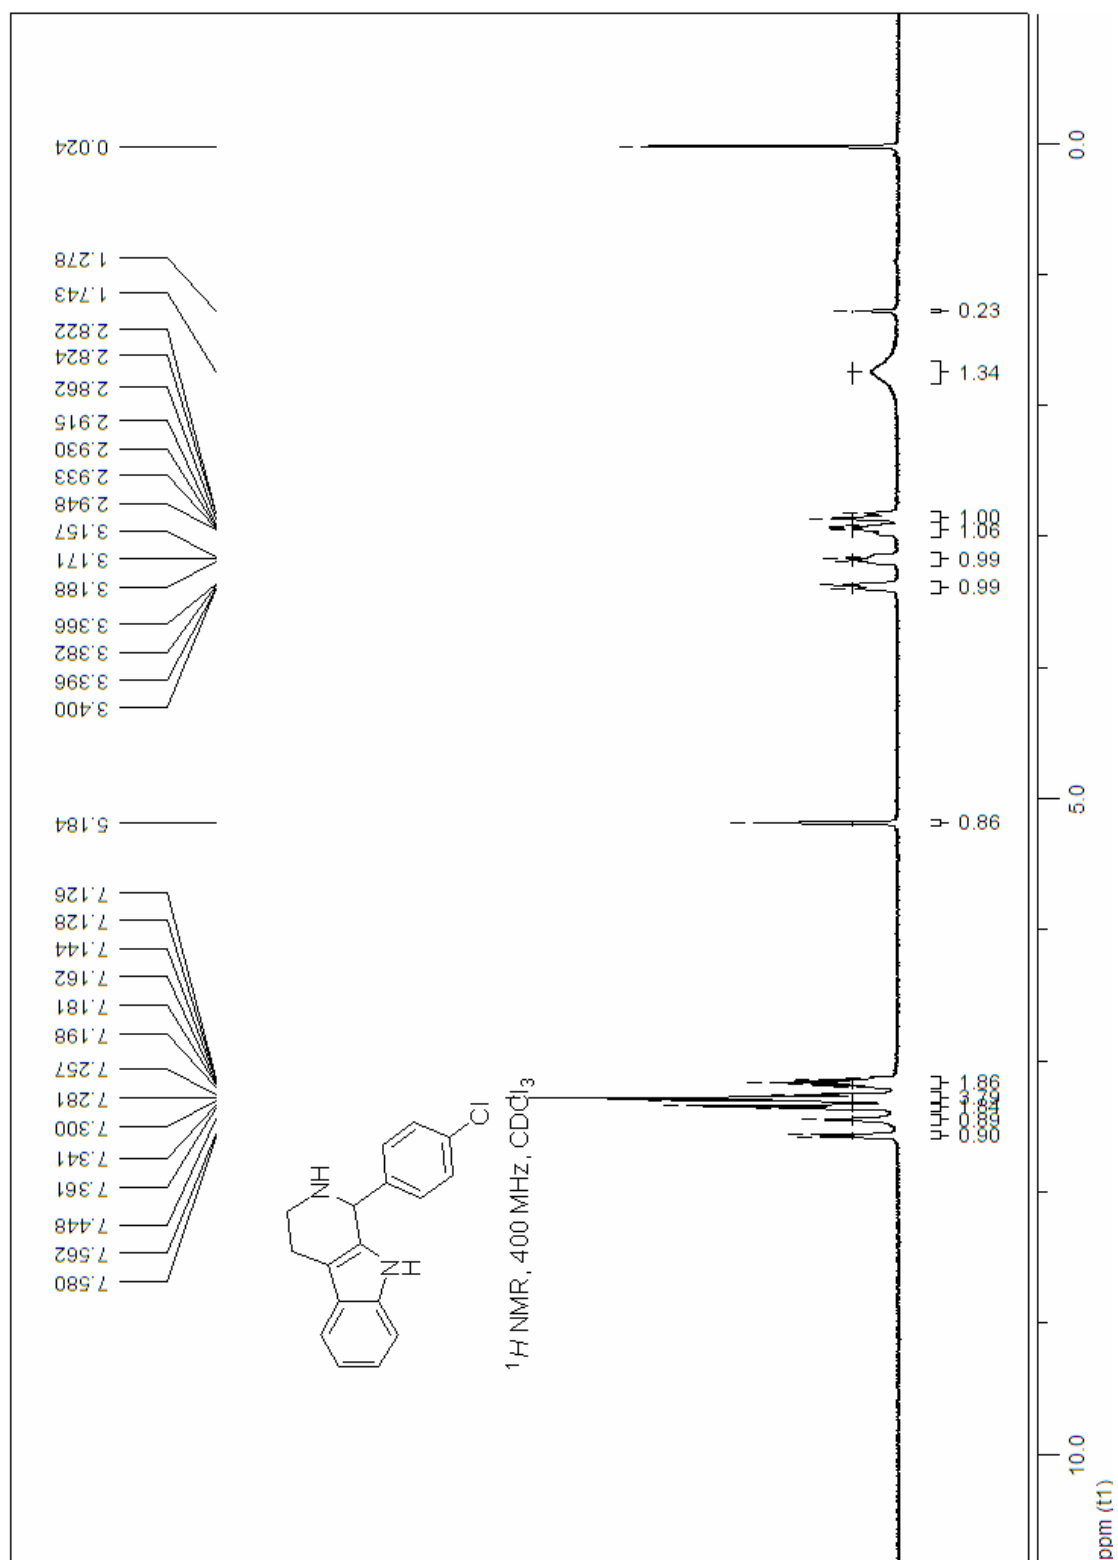

# 1-(4-Chlorophenyl)-1,2,3,4-tetrahydro-β-carboline (3c): <sup>13</sup>C NMR

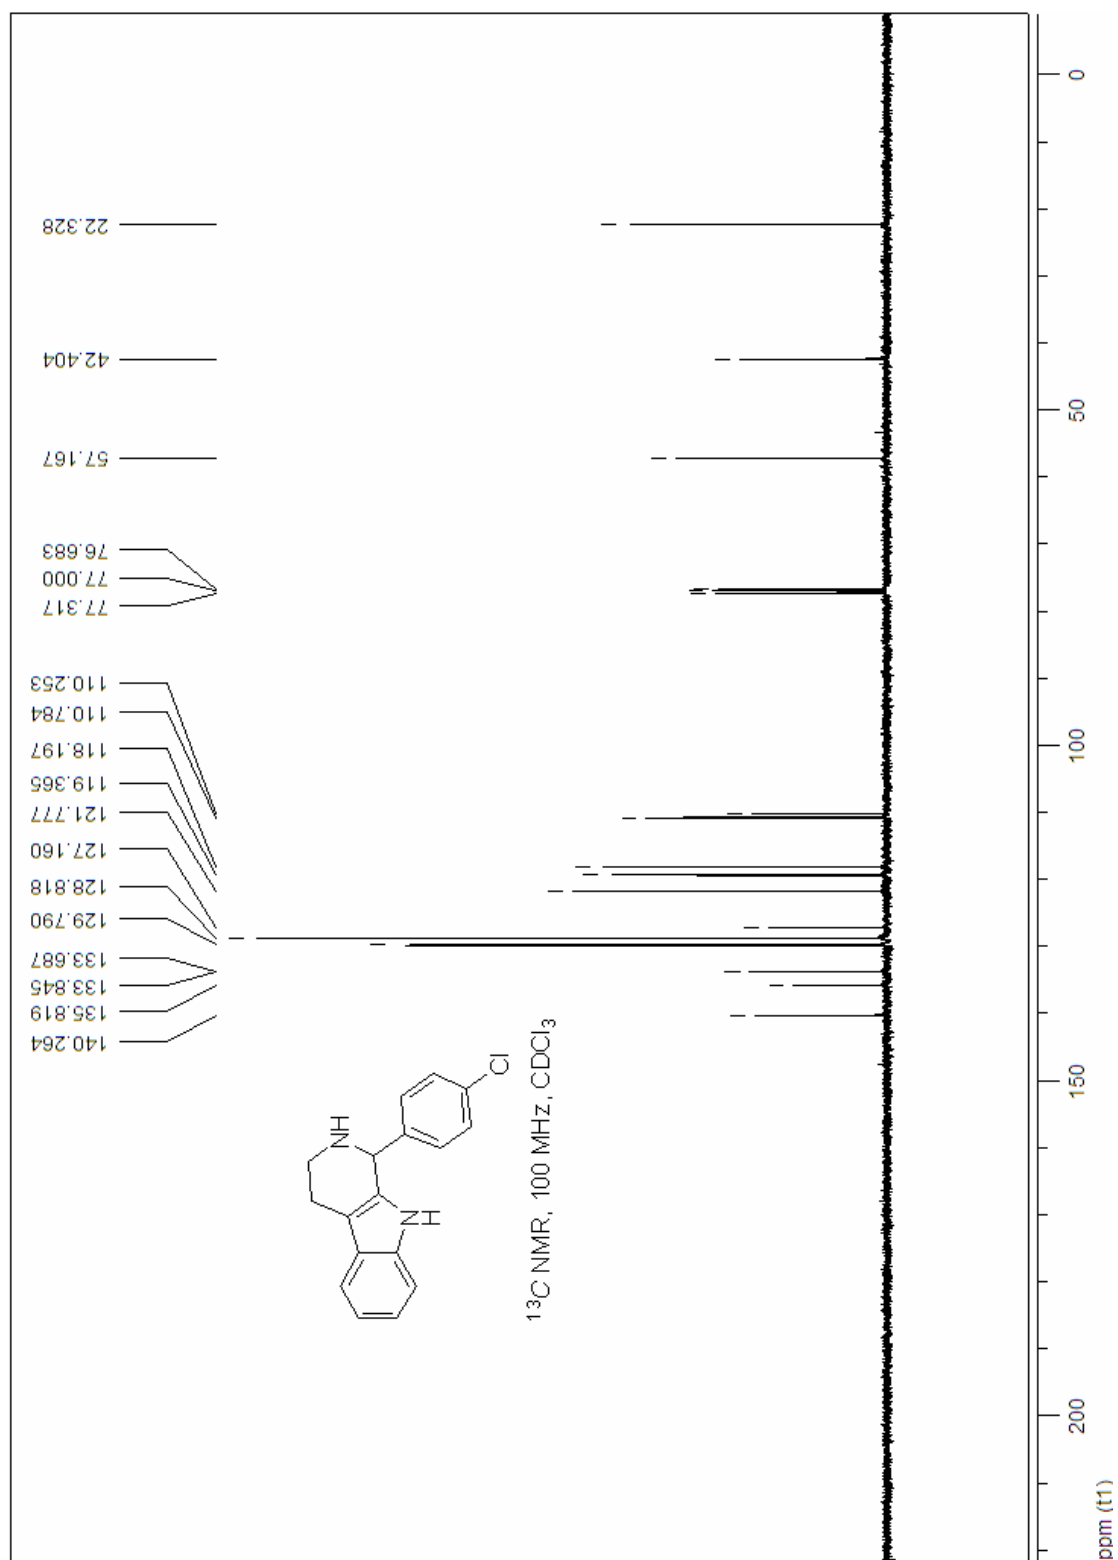



# 1-(2-Fluorophenyl)-1,2,3,4-tetrahydro- $\beta$ -carboline (3d): $^1\text{H}$ NMR

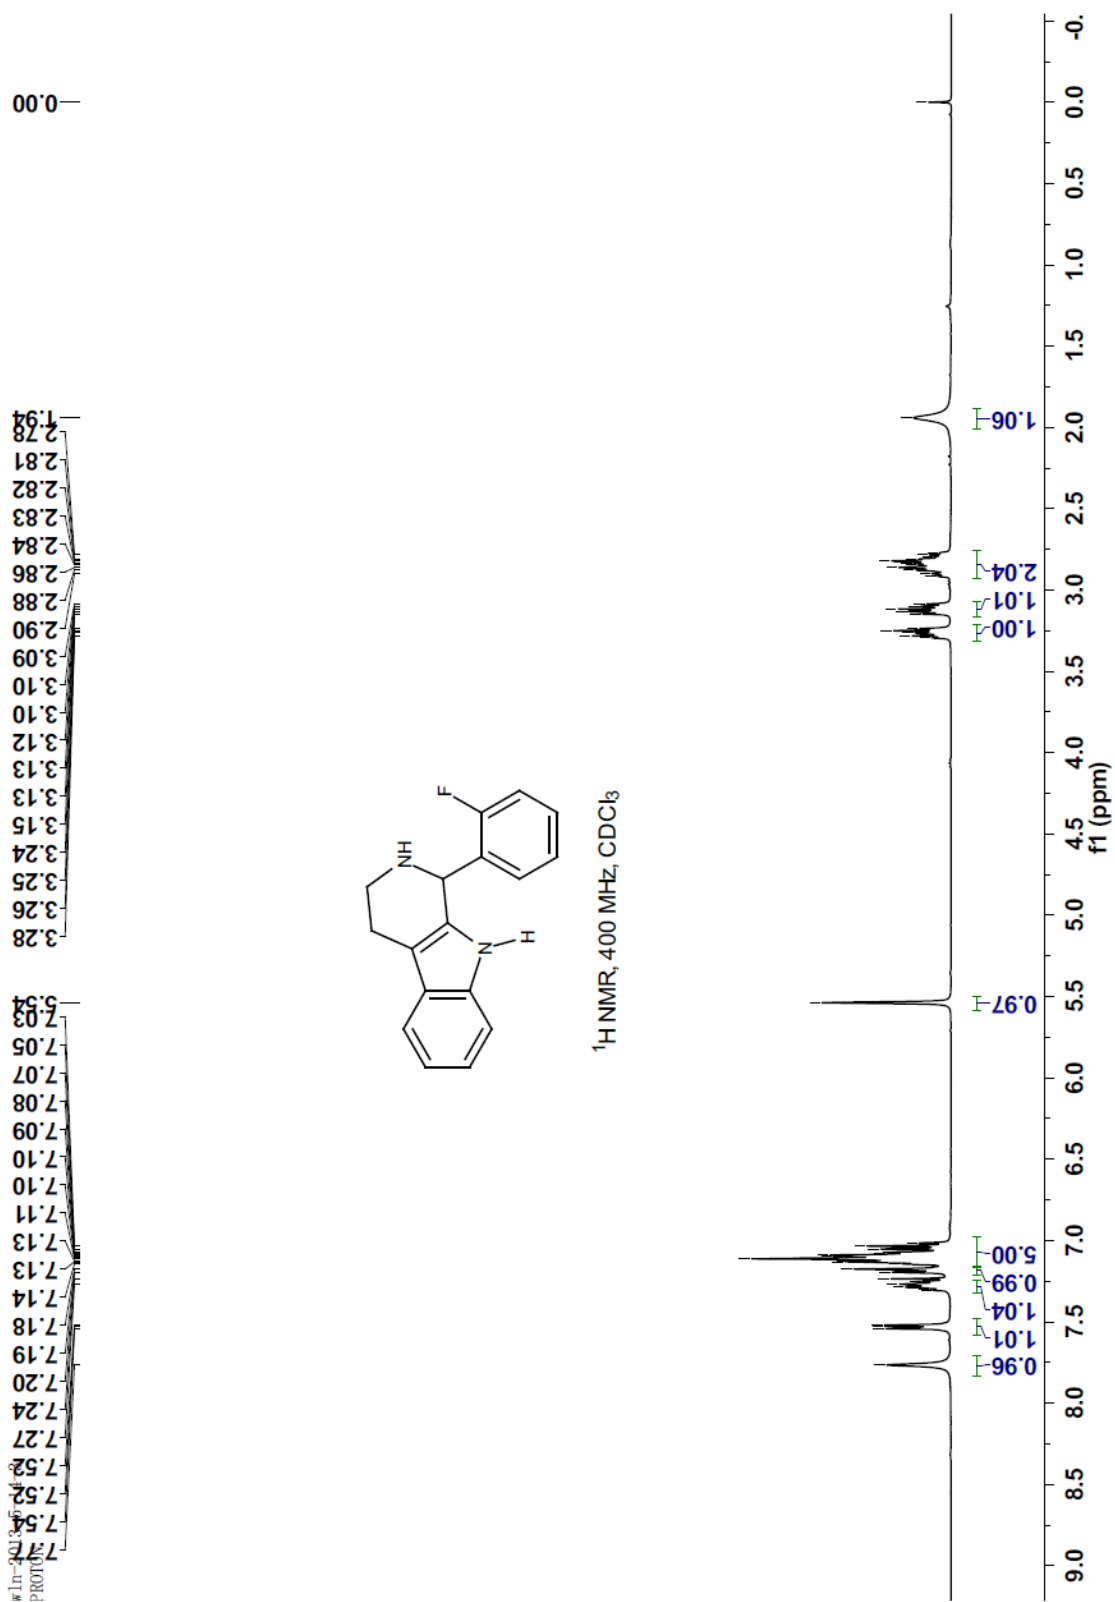

# 1-(2-Fluorophenyl)-1,2,3,4-tetrahydro- $\beta$ -carboline (3d): $^{13}\text{C}$ NMR

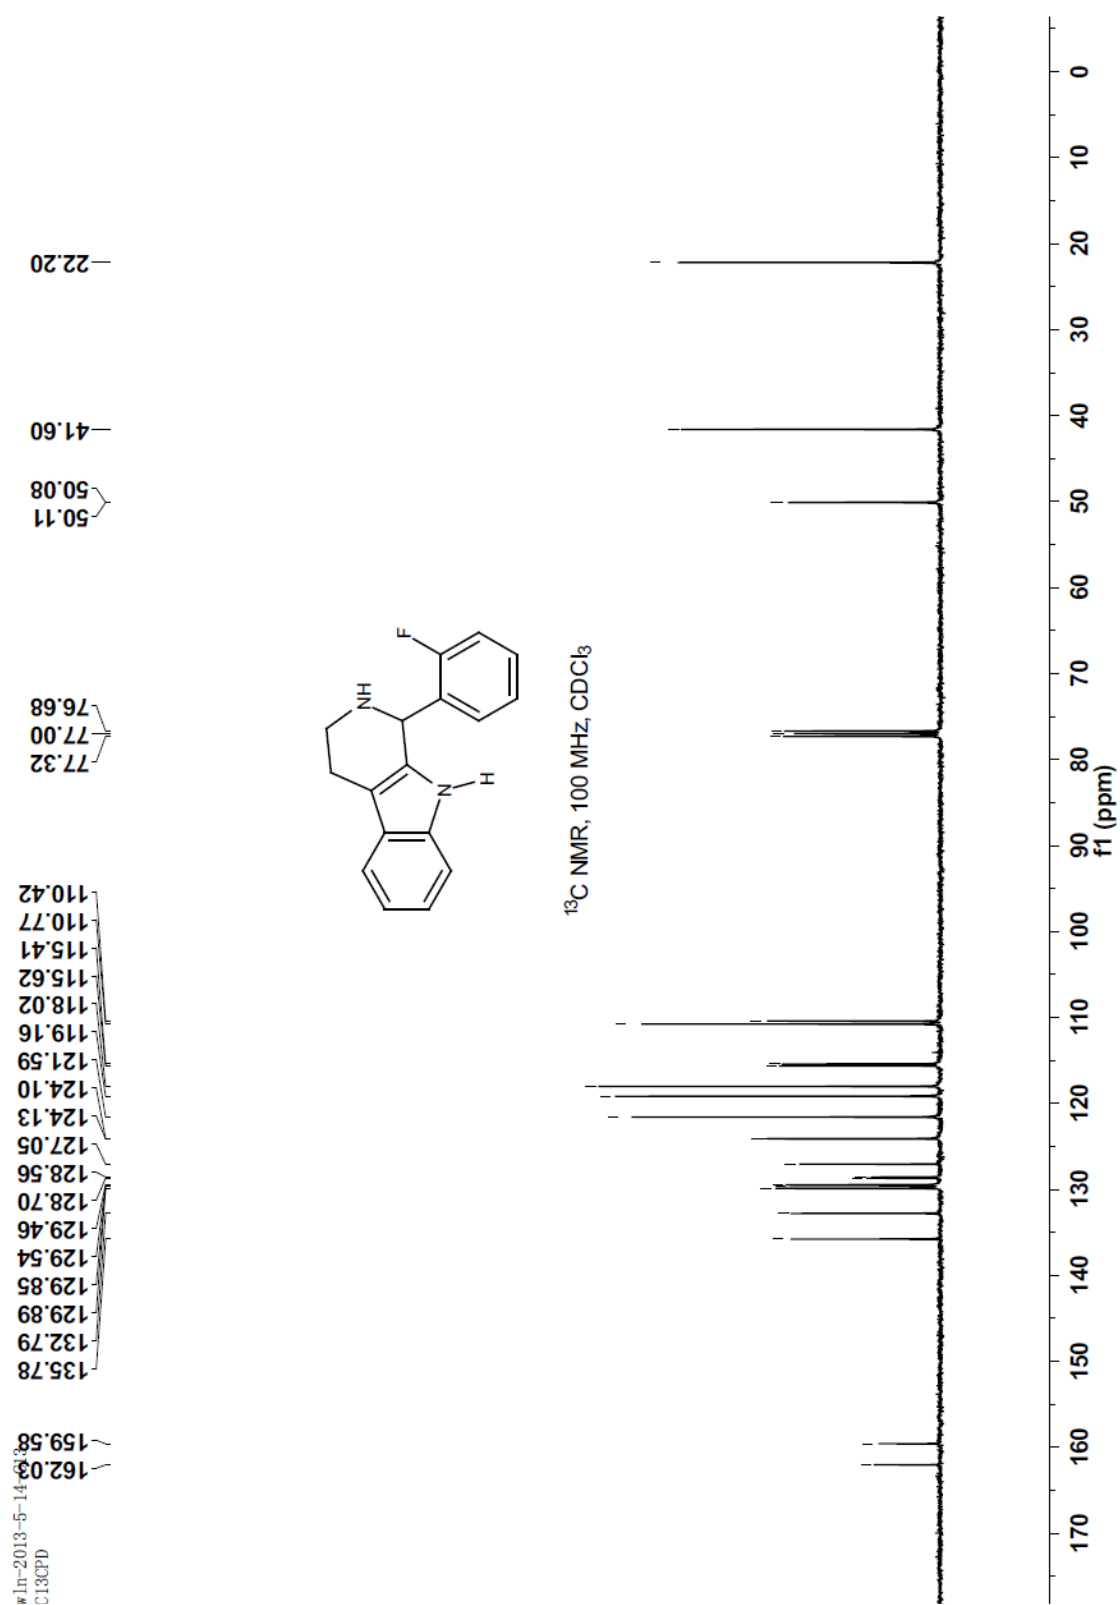

1-(*p*-Methoxyphenyl)-1,2,3,4-tetrahydro- $\beta$ -carboline (3e):  $^1\text{H}$  NMR

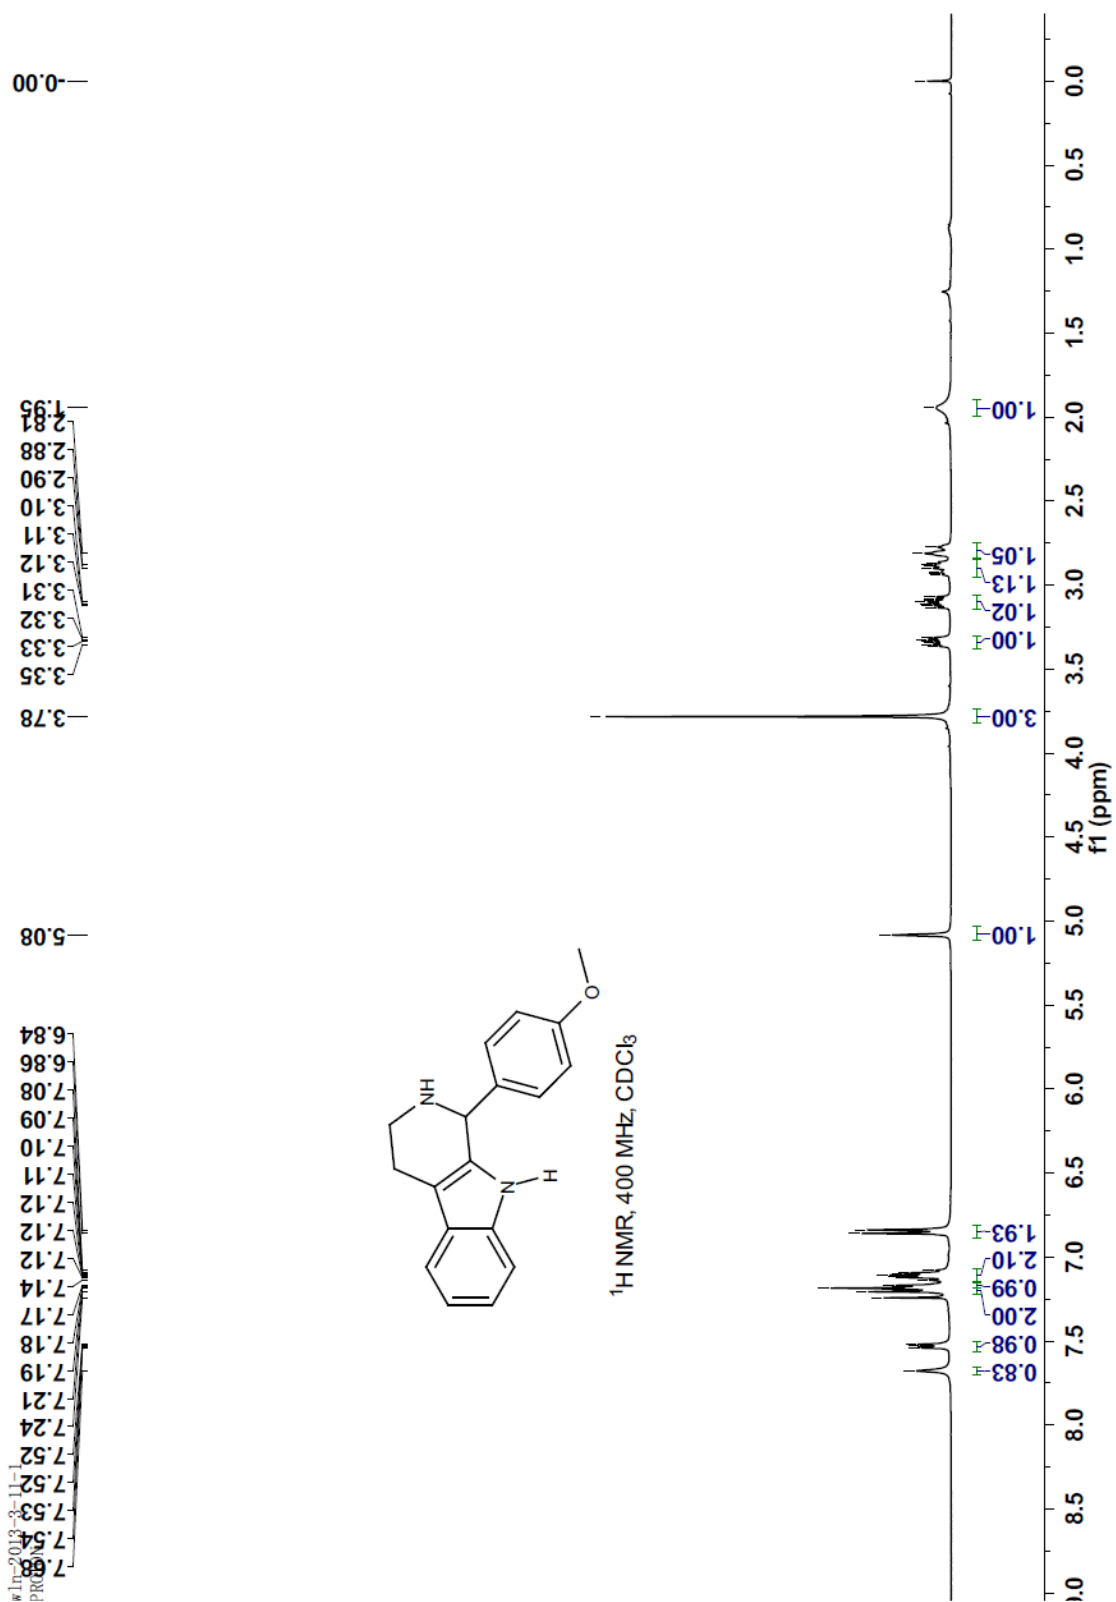

# 1-(*p*-Methoxyphenyl)-1,2,3,4-tetrahydro- $\beta$ -carboline (3e): $^{13}\text{C}$ NMR

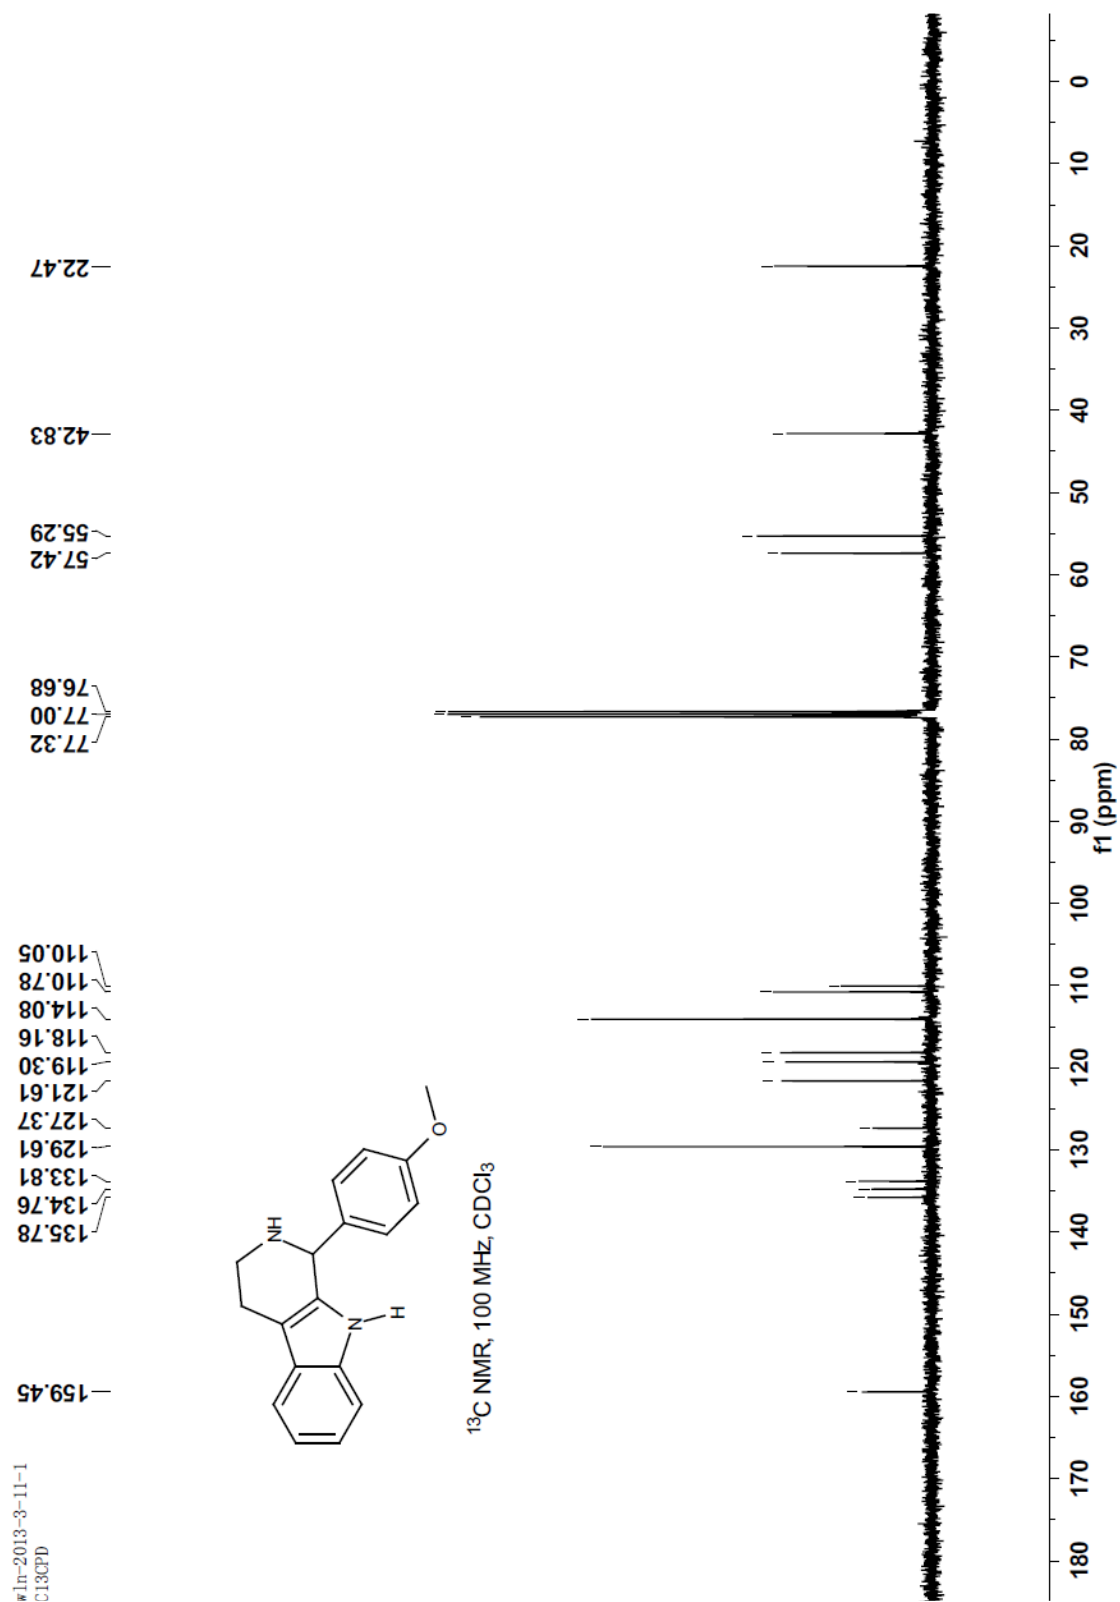

WIn-2013-3-11-1  
C13CPD

1-(Naphthyl)-1,2,3,4-tetrahydro- $\beta$ -carboline (3f):  $^1\text{H}$  NMR

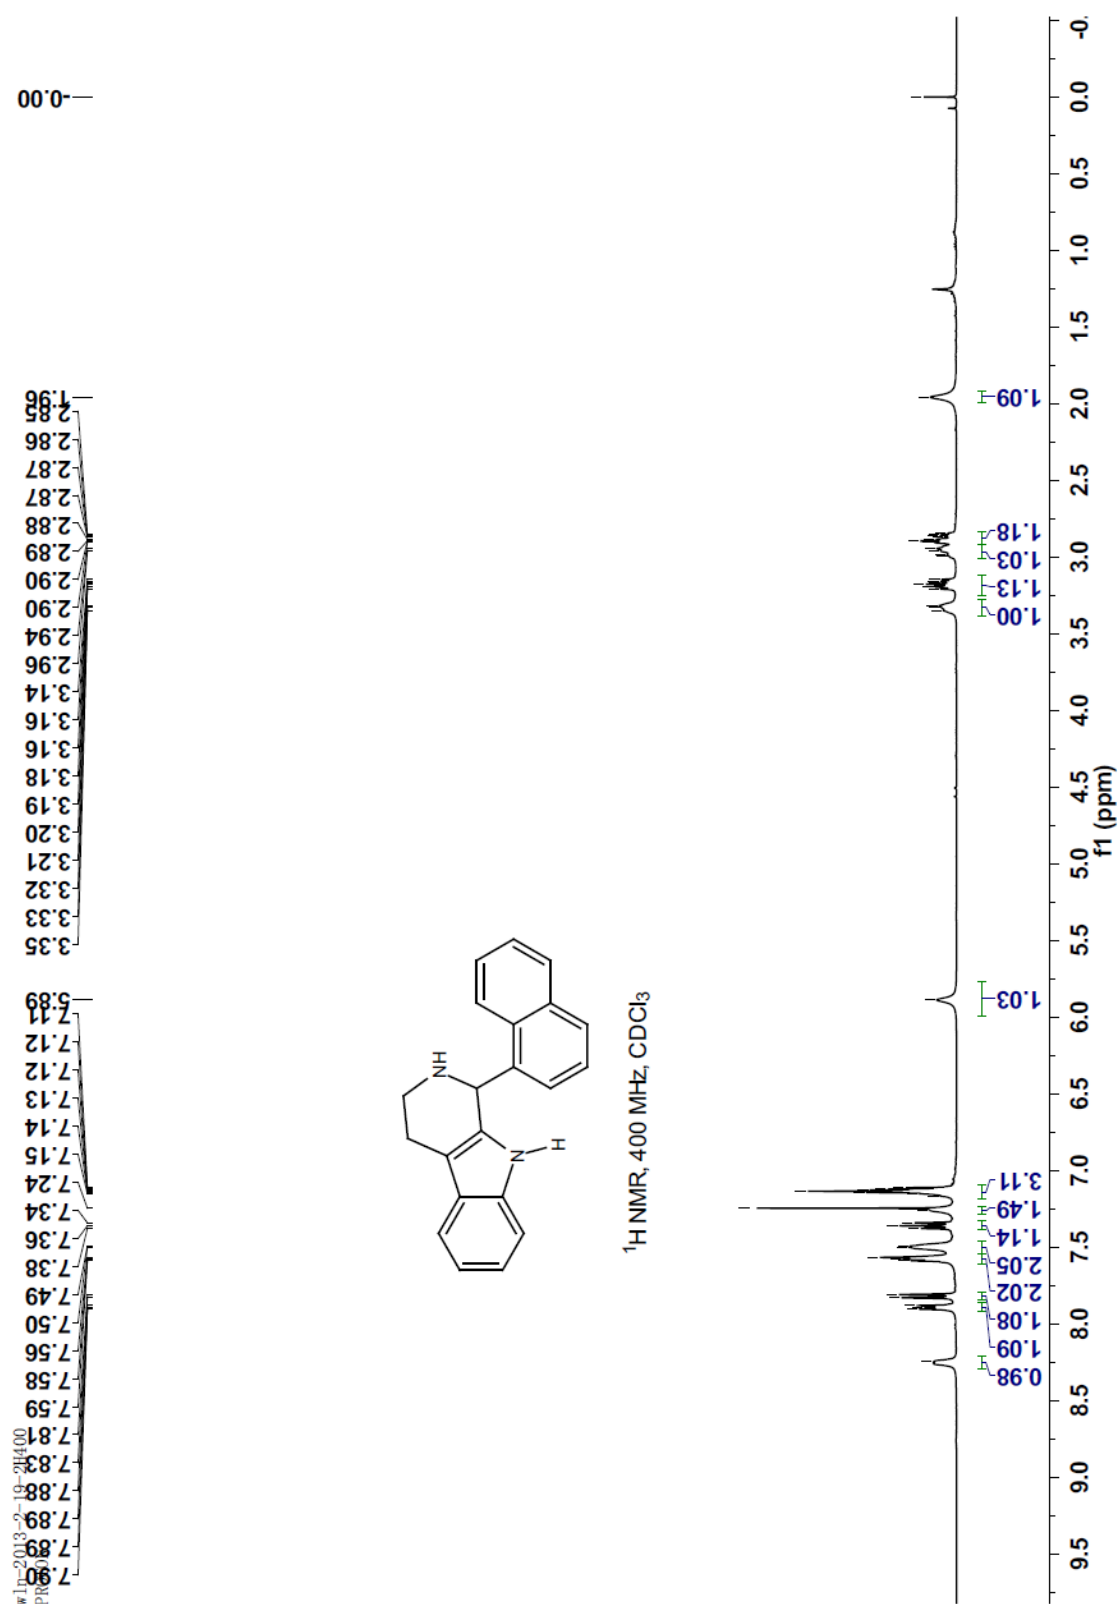

1-(Naphthyl)-1,2,3,4-tetrahydro-β-carboline (3f): <sup>13</sup>C NMR

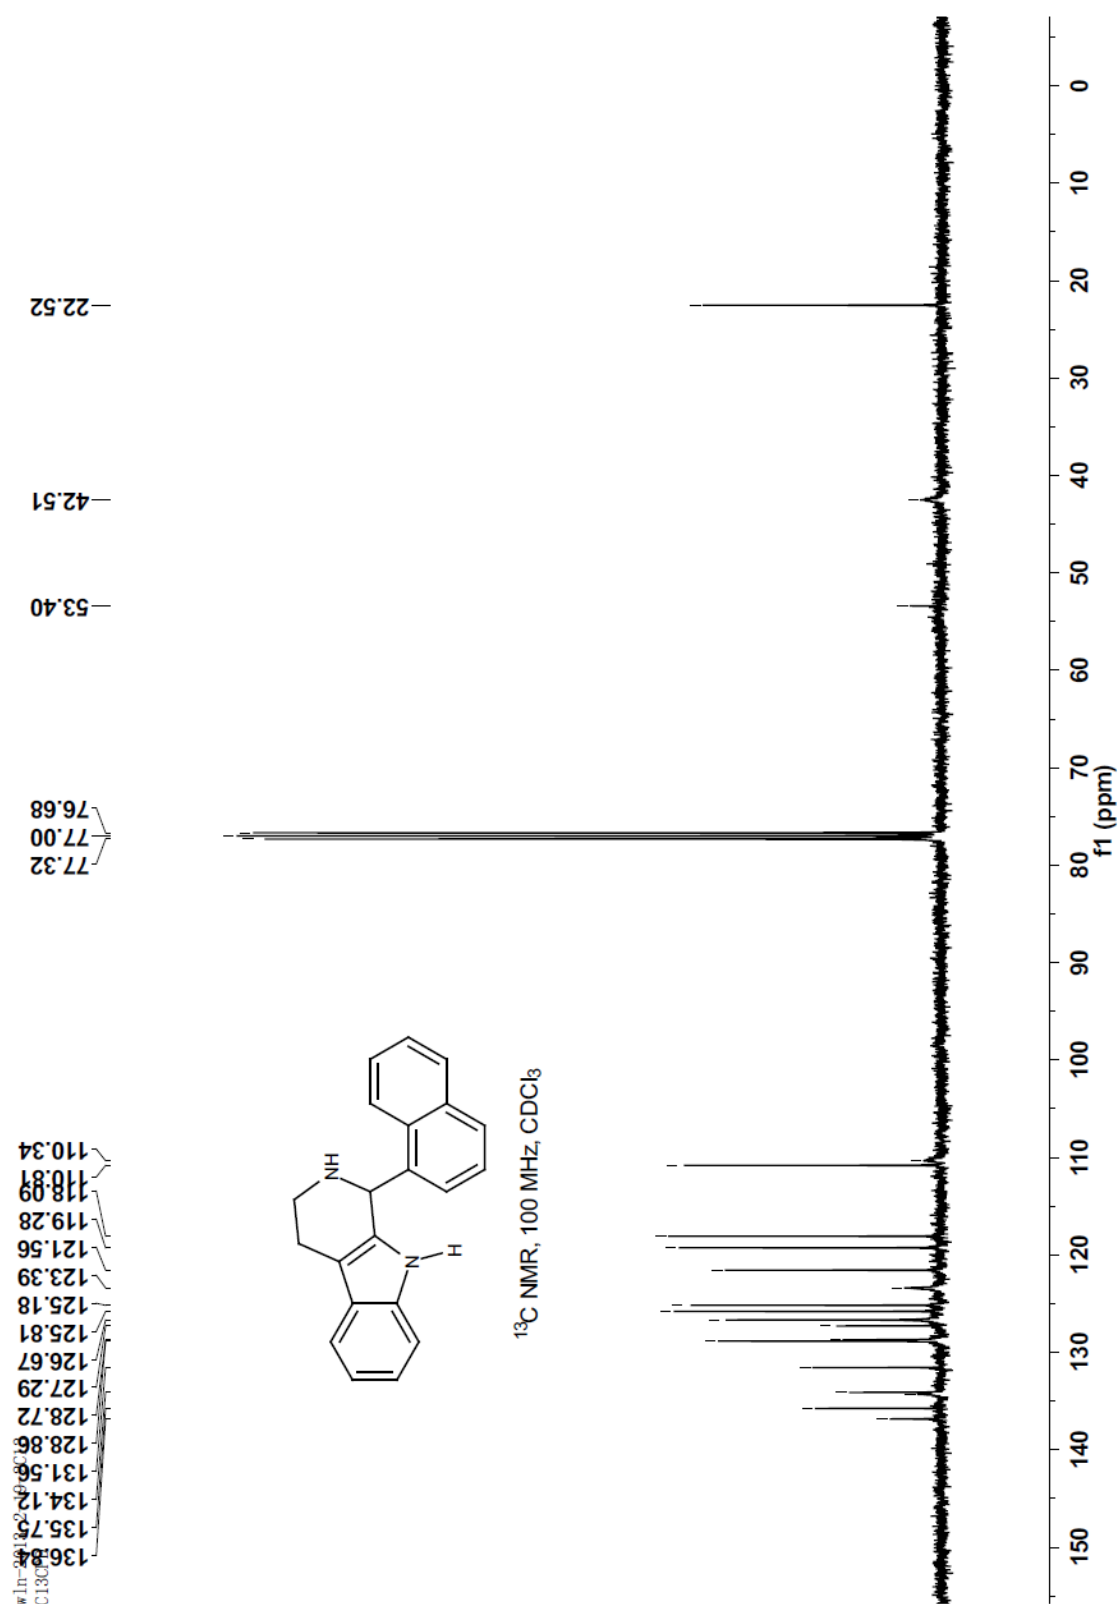

1-(2-Thienyl)-1,2,3,4-tetrahydro-β-carboline (3g): <sup>1</sup>H NMR

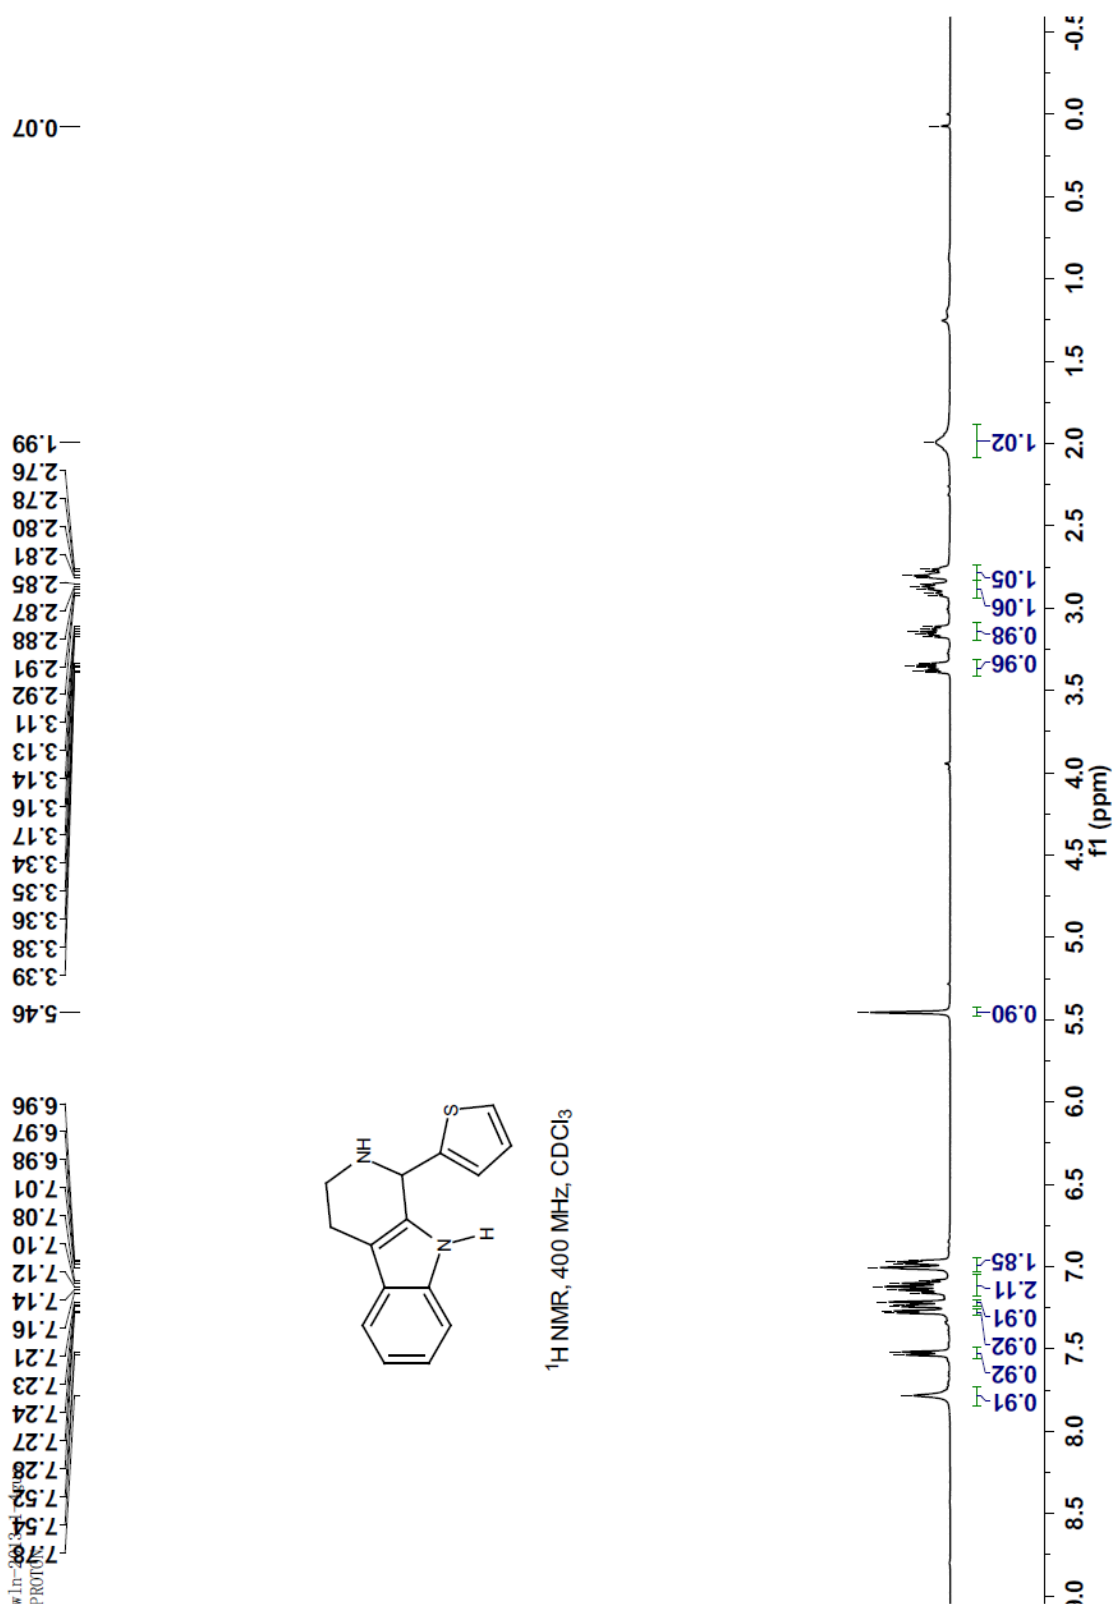

1-(2-Thienyl)-1,2,3,4-tetrahydro- $\beta$ -carboline (3g):  $^{13}\text{C}$  NMR

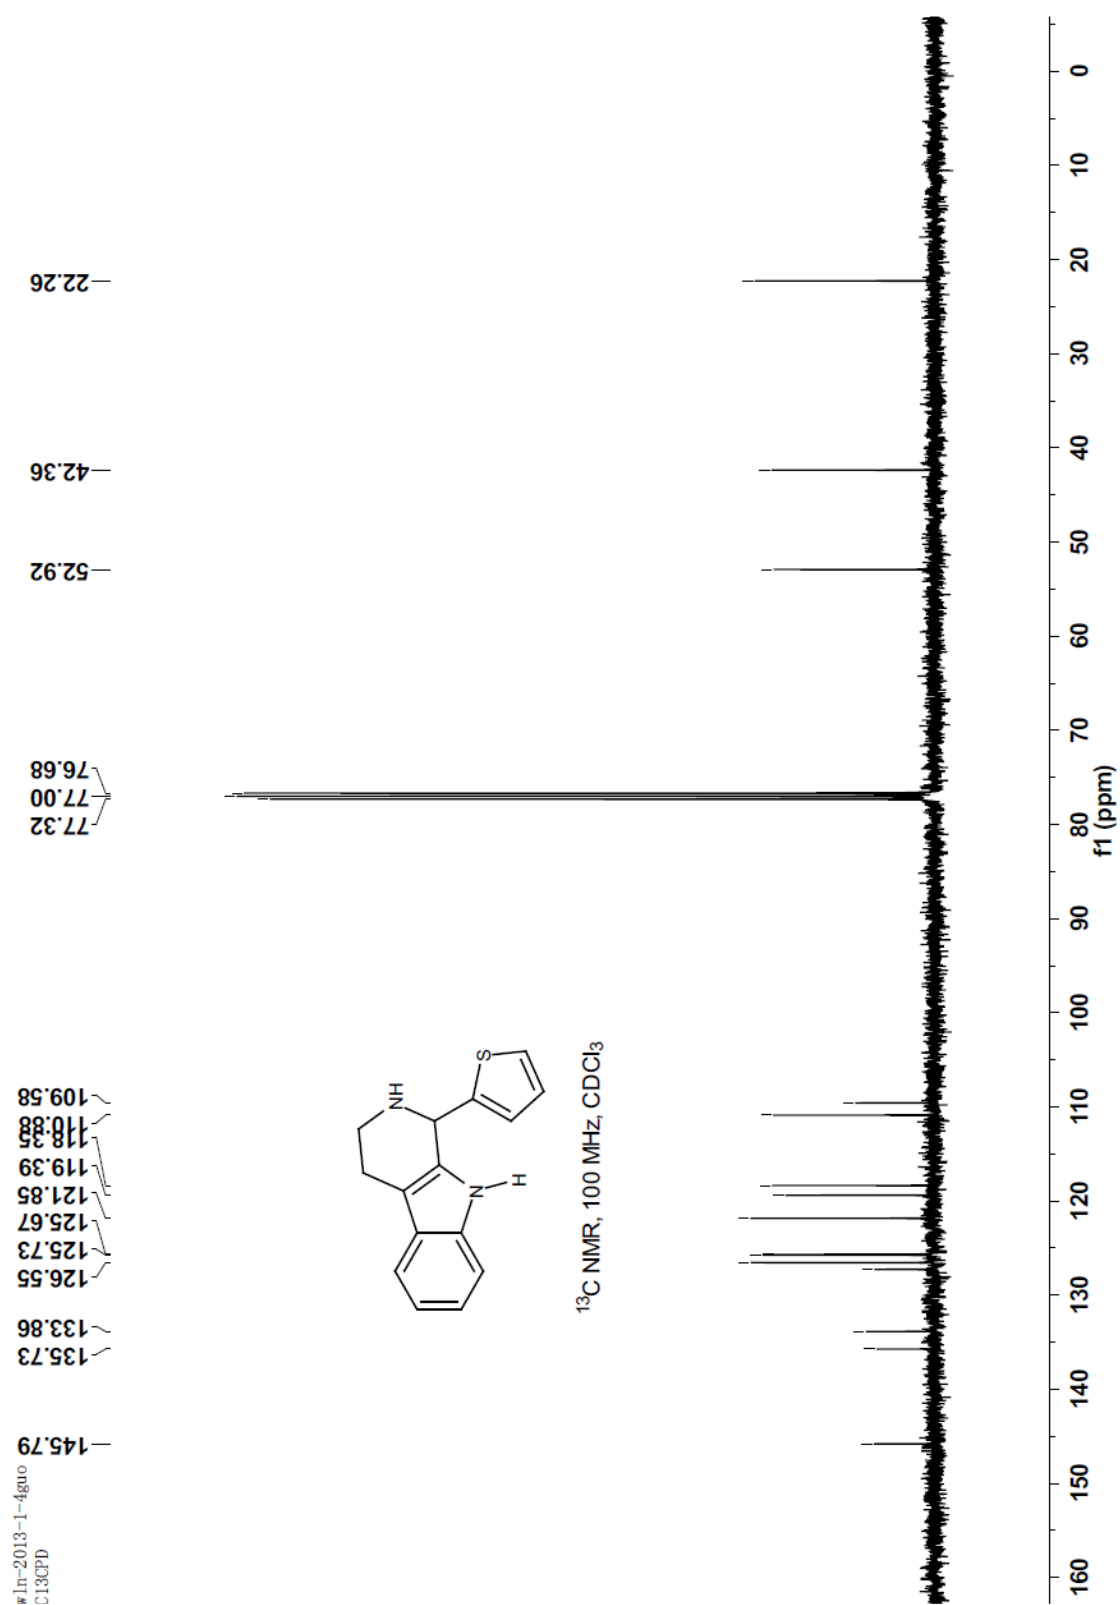



# 1-Cyclohexyl-1,2,3,4-tetrahydro-β-carboline (3h): <sup>1</sup>H NMR

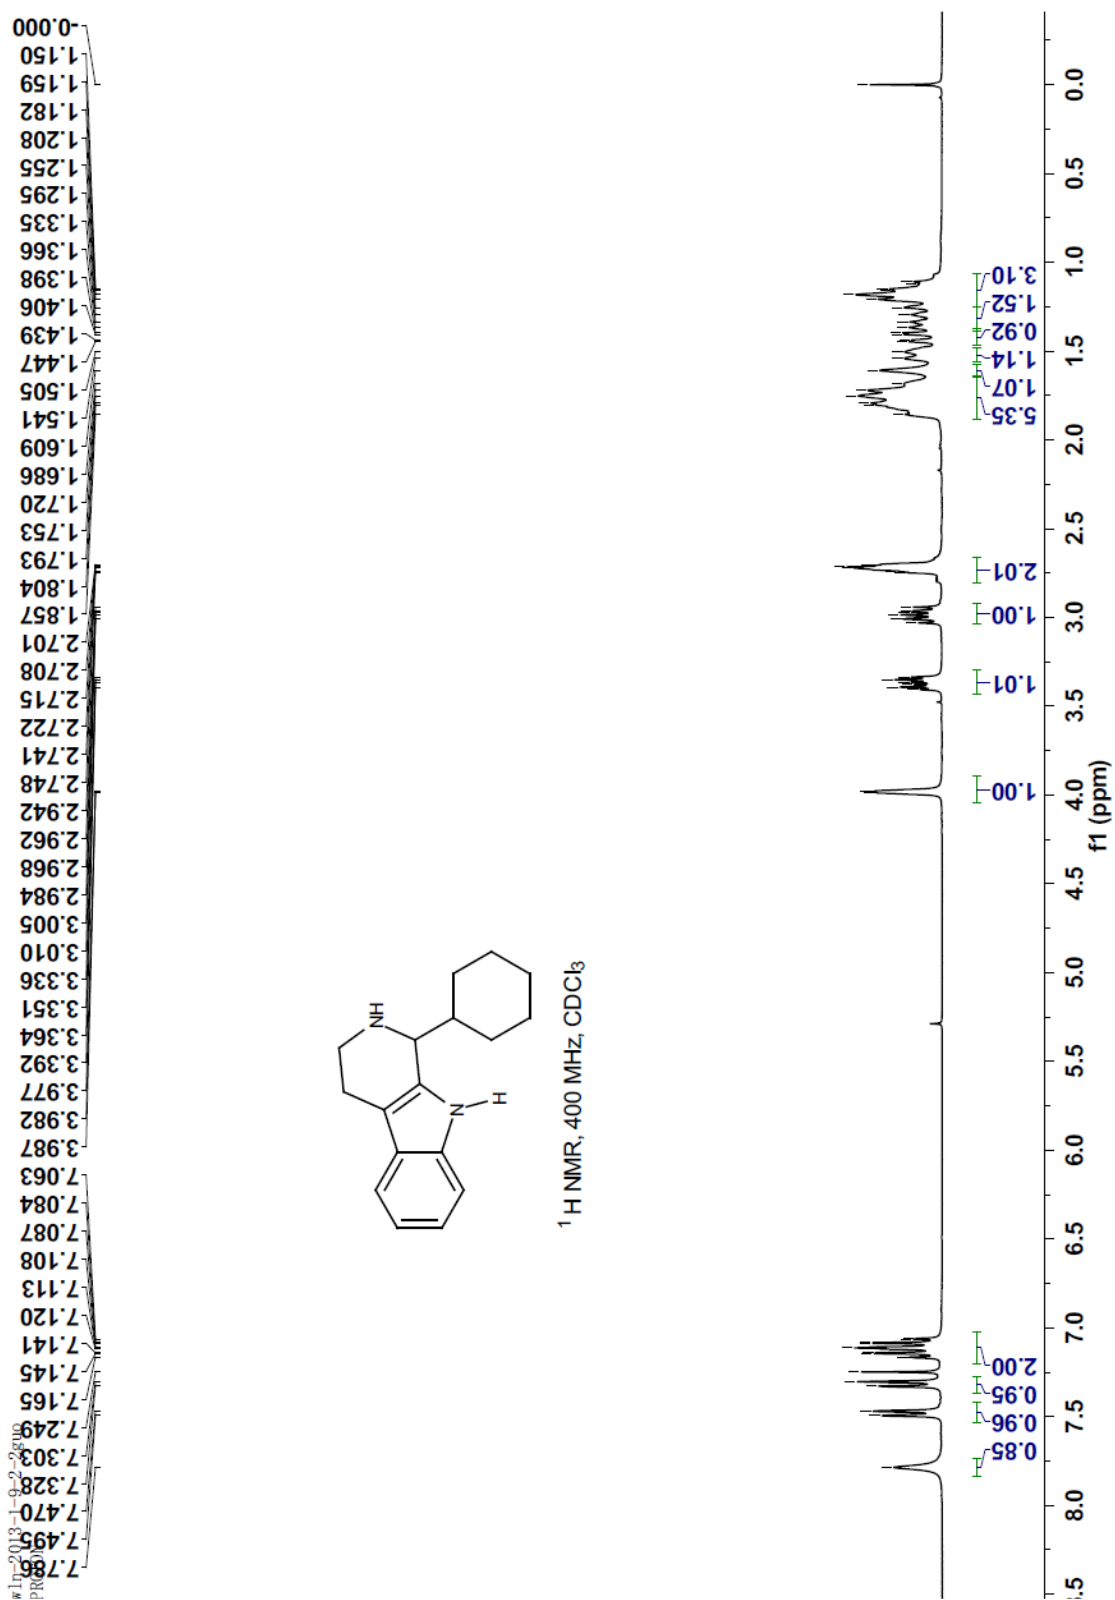

# 1-Cyclohexyl-1,2,3,4-tetrahydro- $\beta$ -carboline (3h): $^{13}\text{C}$ NMR

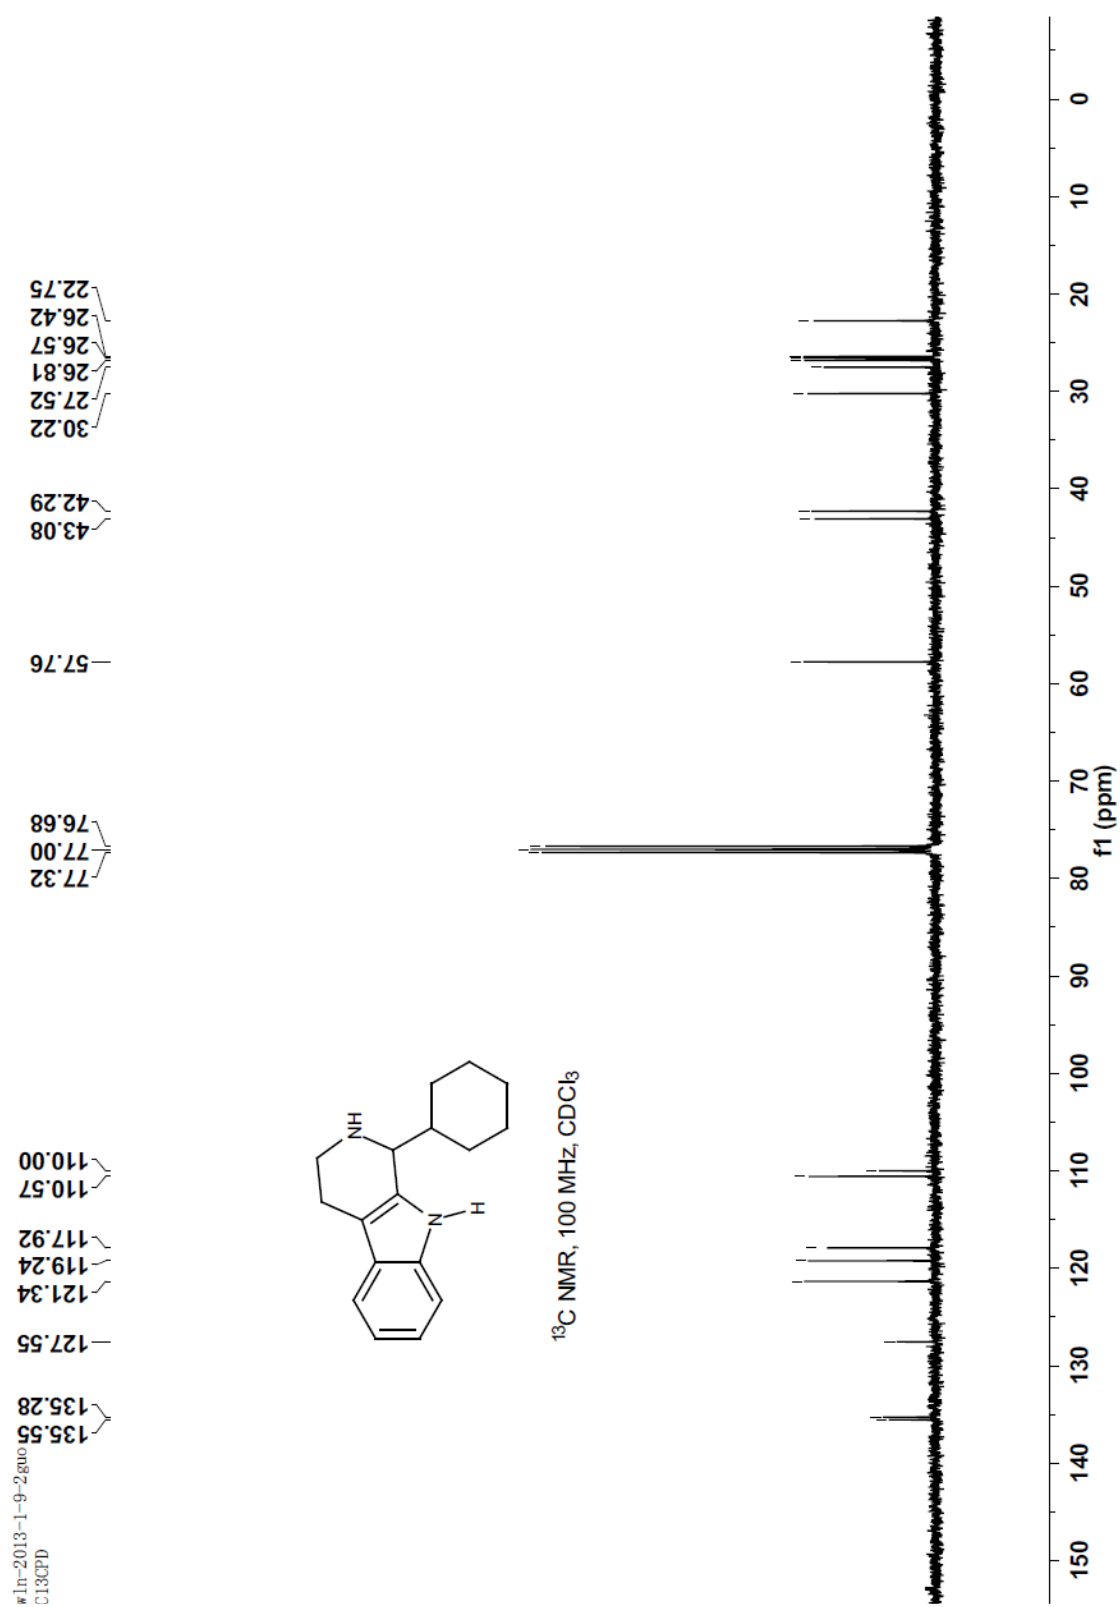

# 1-Isopropyl-1,2,3,4-tetrahydro-β-carboline (3i): <sup>1</sup>H NMR

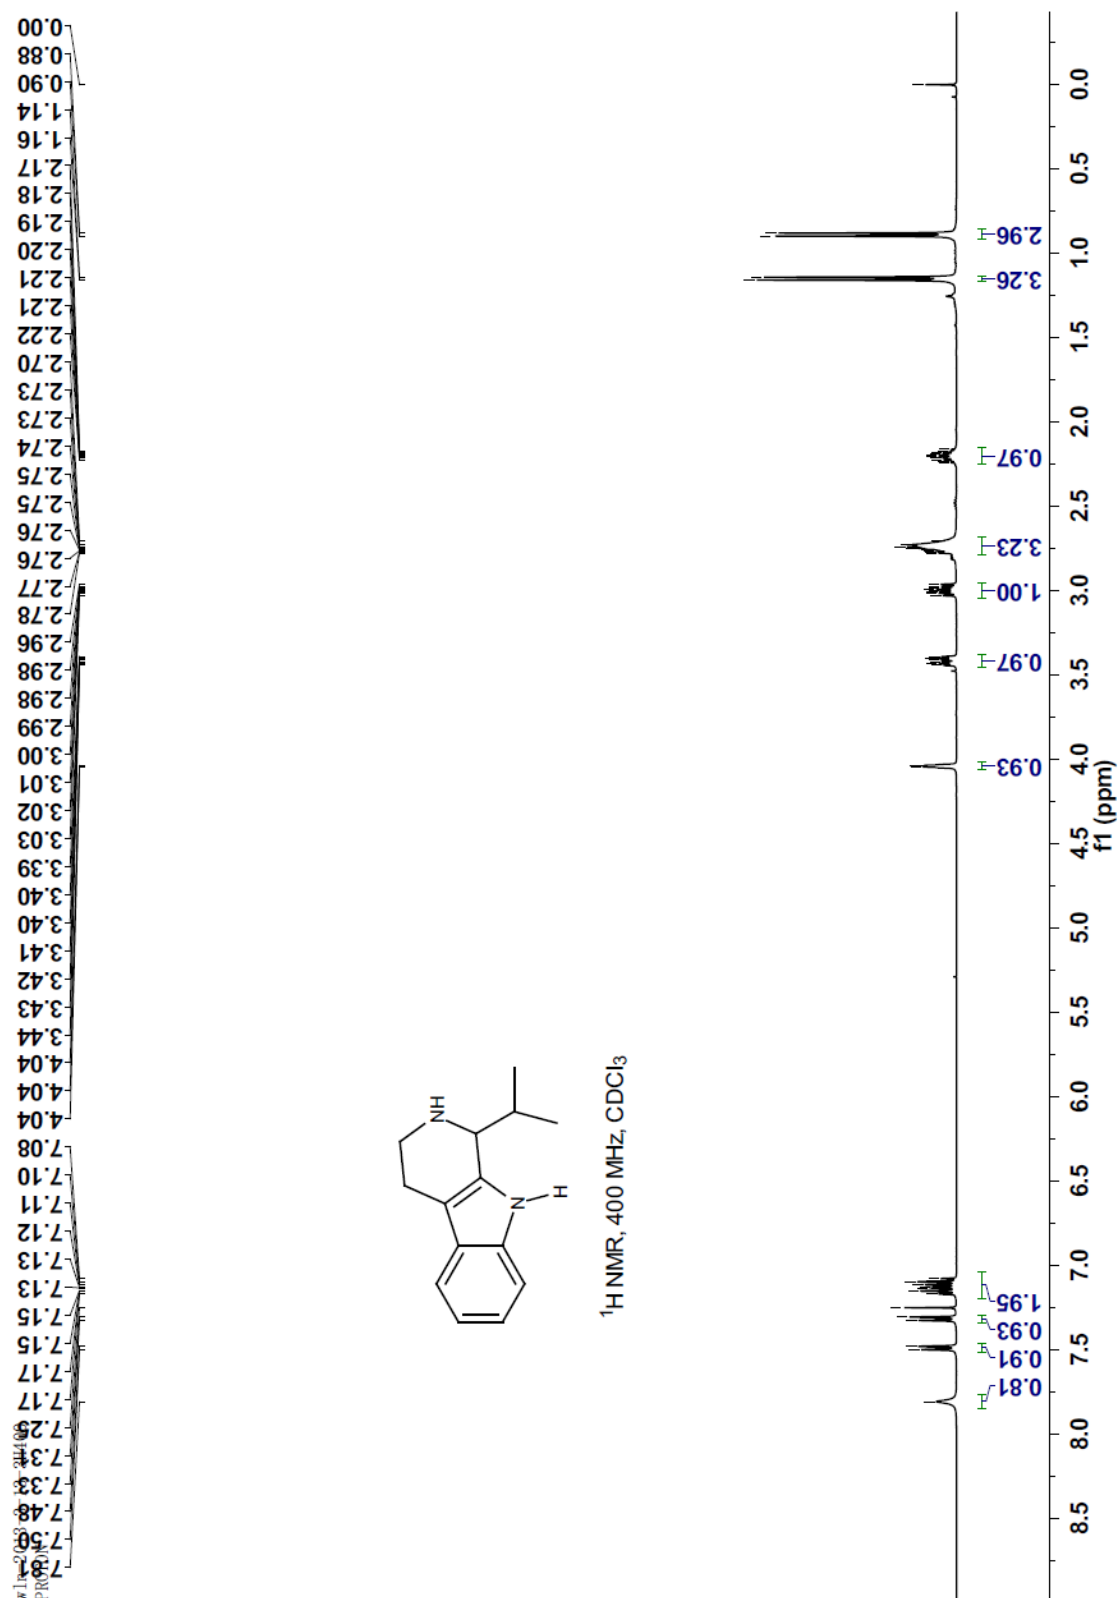

# 1-Isopropyl-1,2,3,4-tetrahydro-β-carboline (3i): <sup>13</sup>C NMR

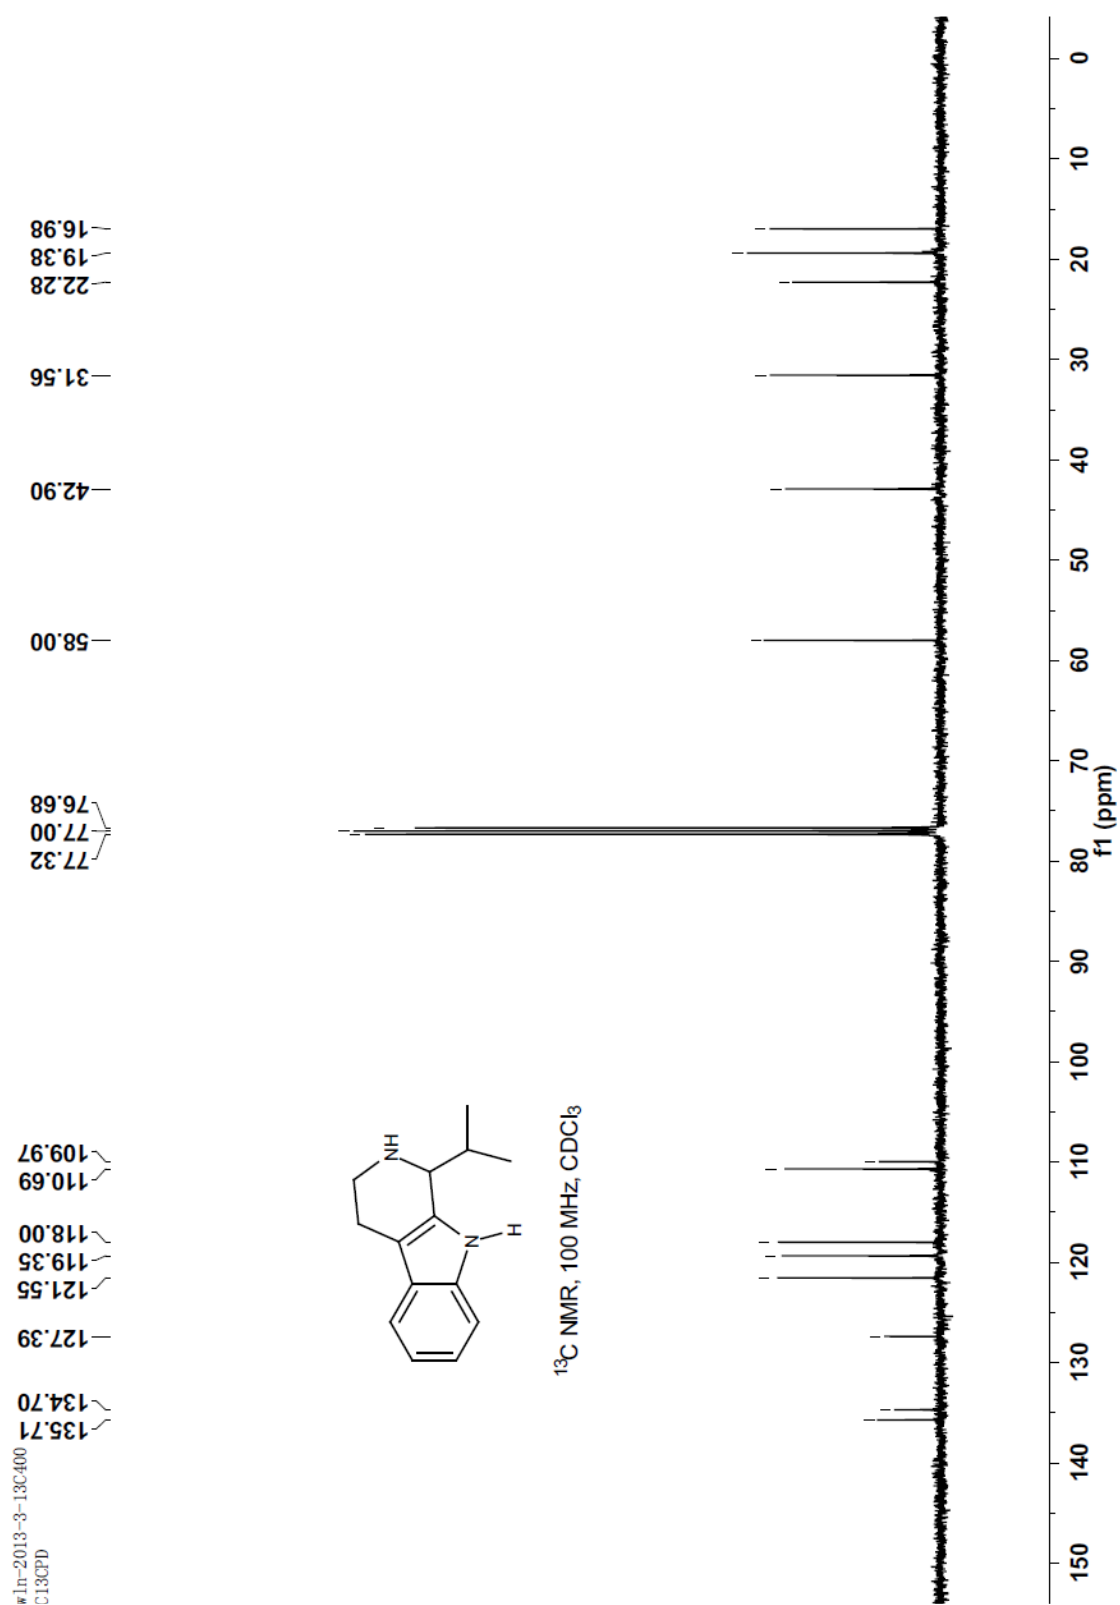

# 1-Pentyl-1,2,3,4-tetrahydro- $\beta$ -carboline (3j): $^1\text{H}$ NMR

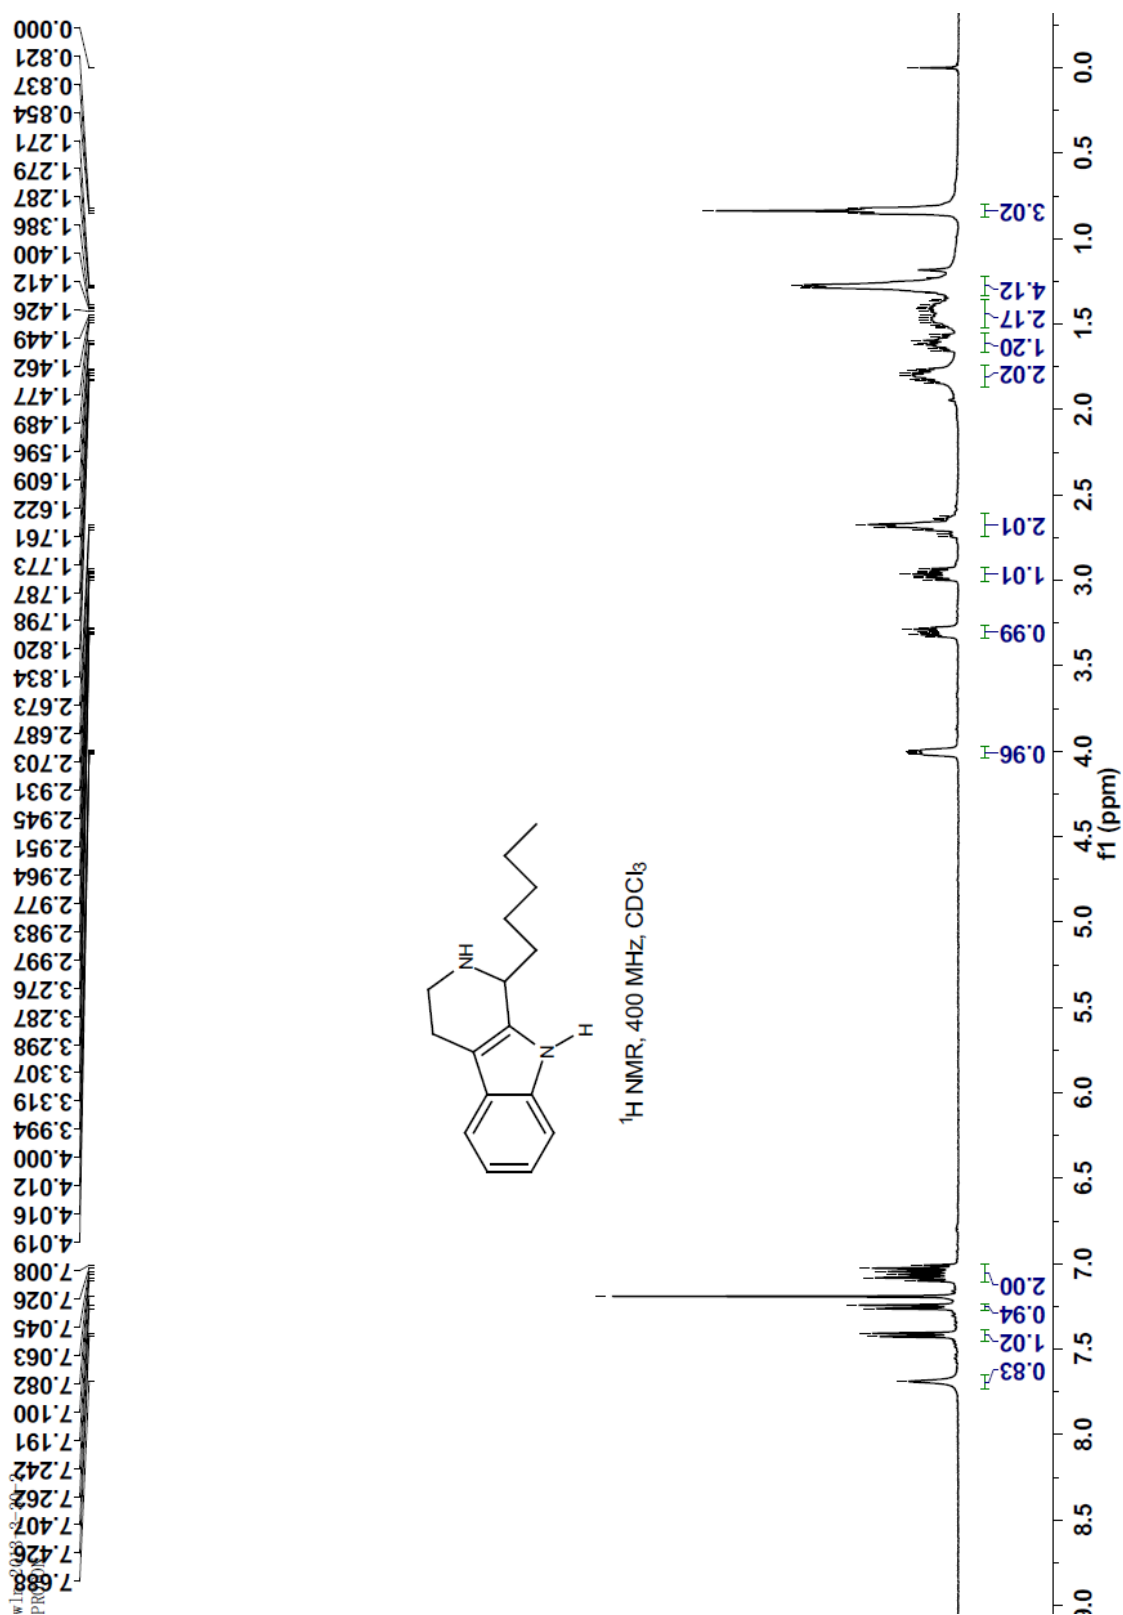

# 1-Pentyl-1,2,3,4-tetrahydro- $\beta$ -carboline (3j): $^{13}\text{C}$ NMR

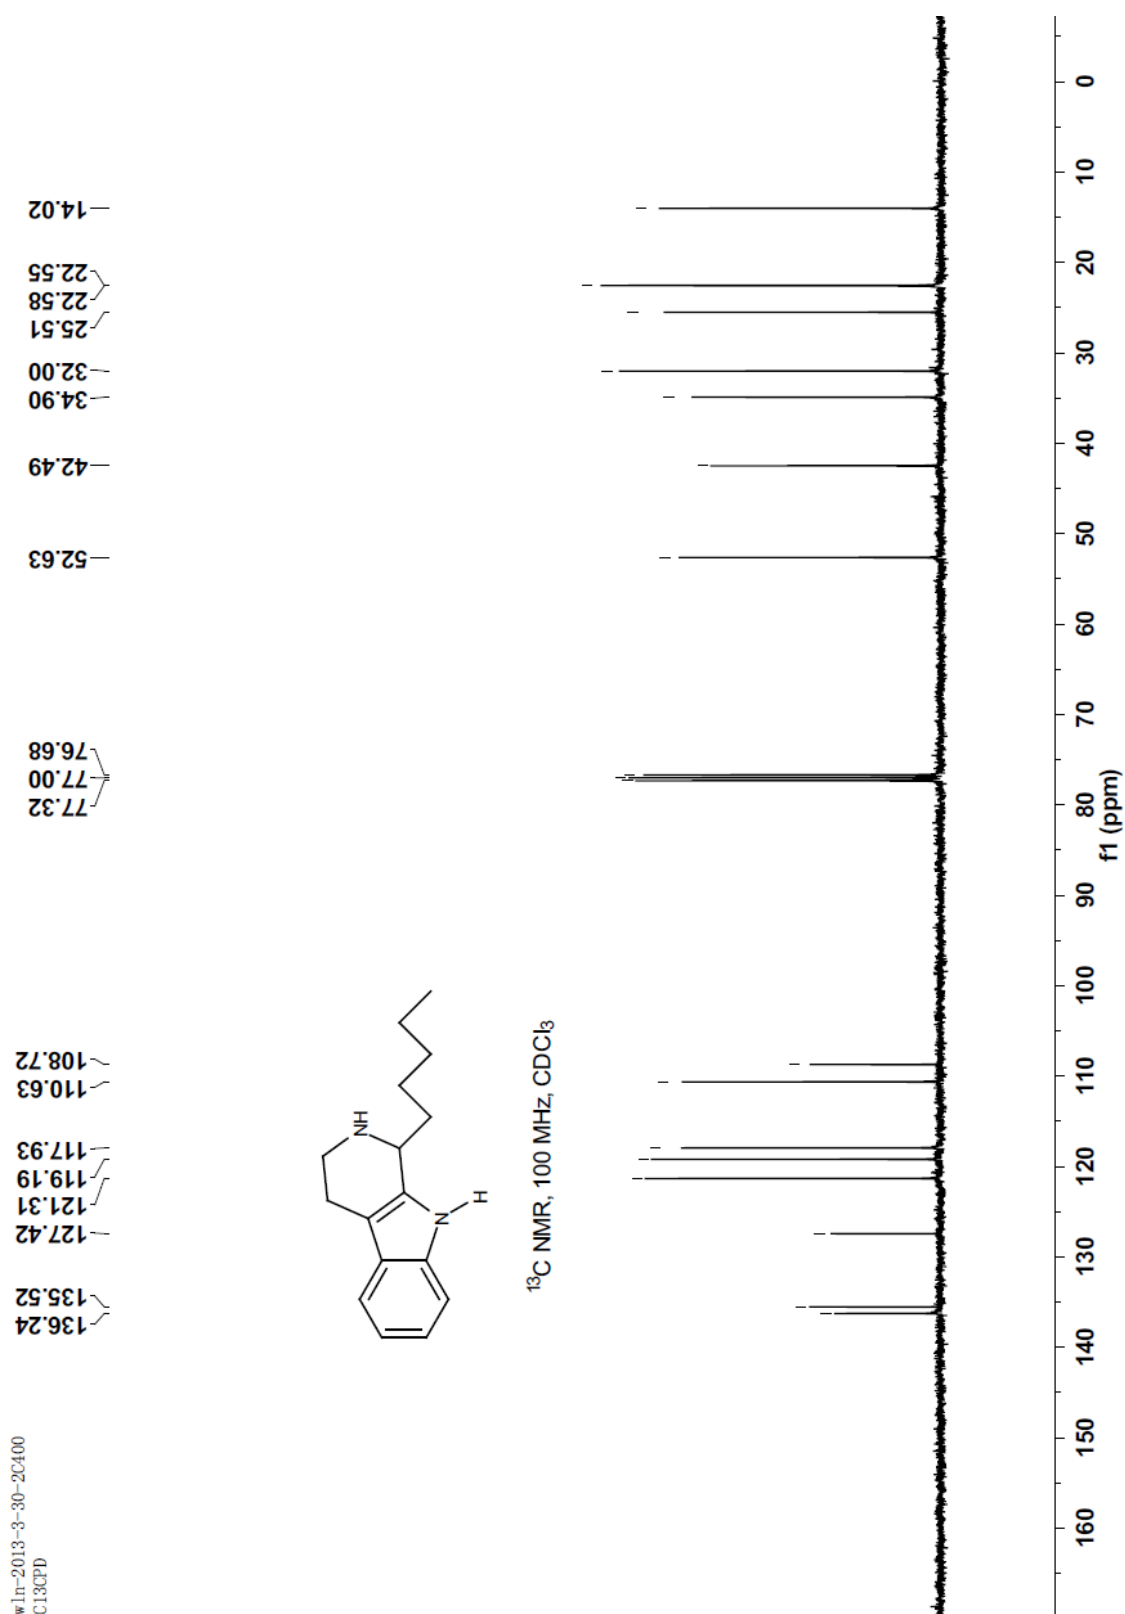

# 1-Phenyl-1-trifluoromethyl-1,2,3,4-tetrahydro-β-carboline (3k): <sup>1</sup>H NMR

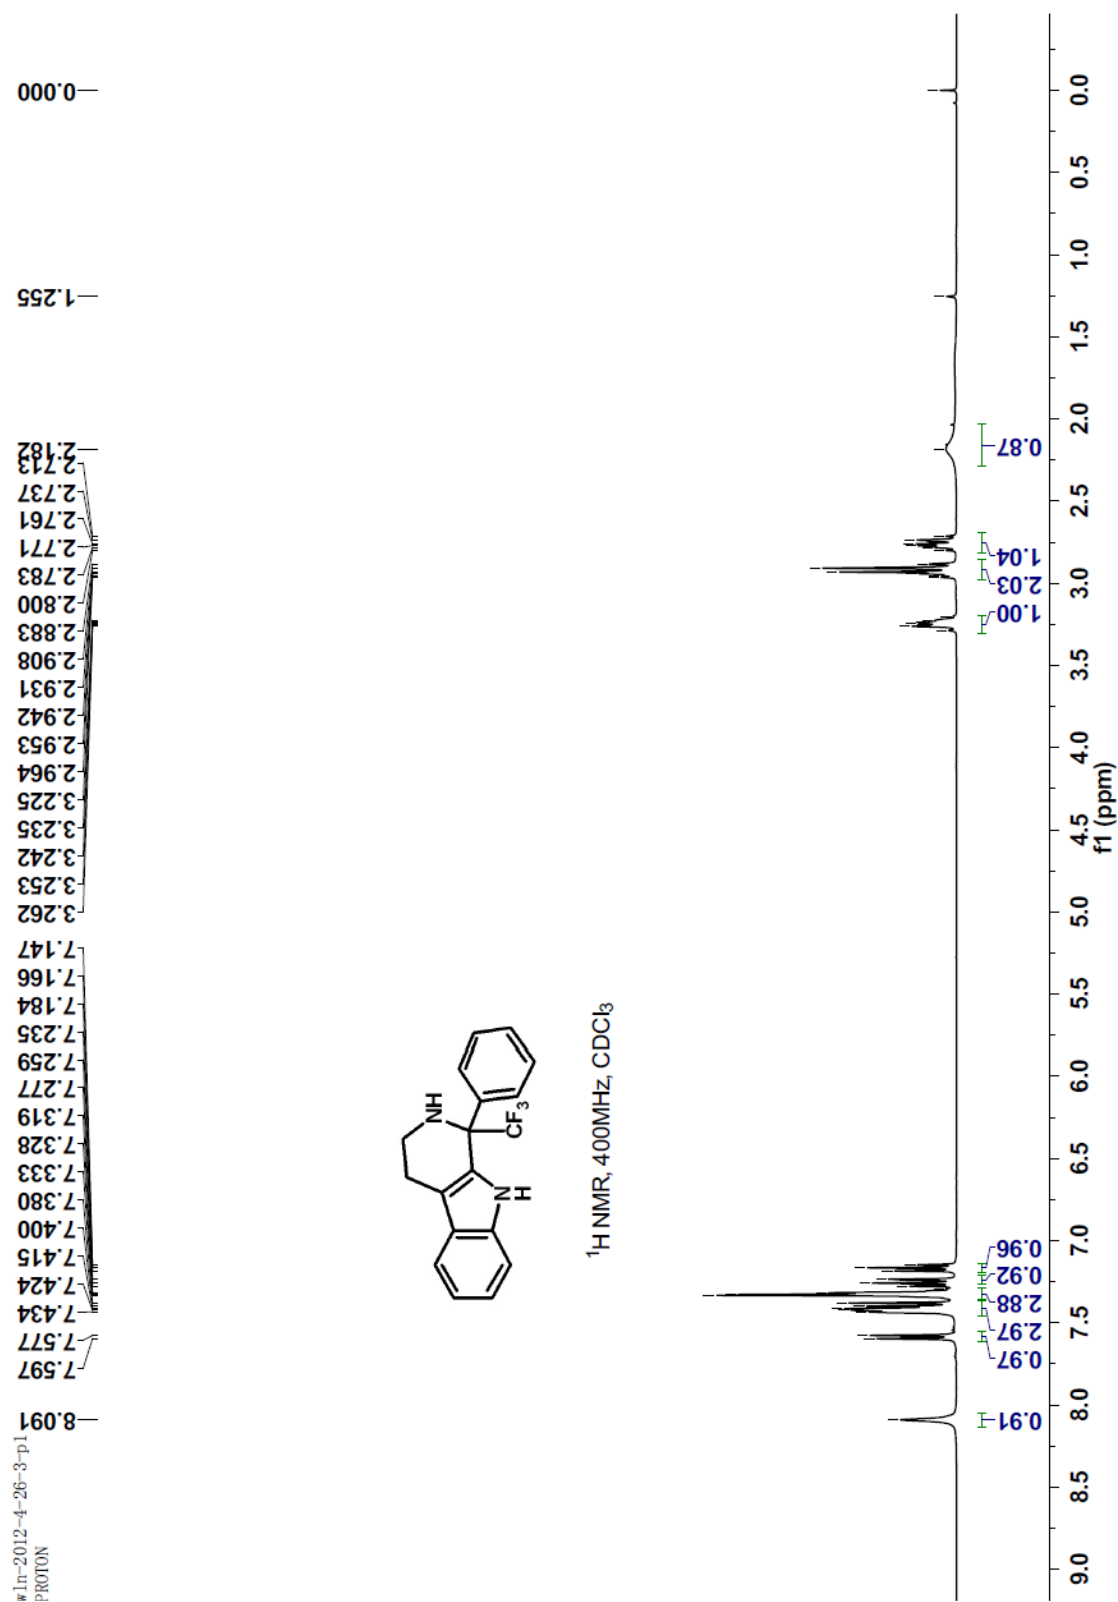

# 1-Phenyl-1-trifluoromethyl-1,2,3,4-tetrahydro-β-carboline (3k): <sup>13</sup>C NMR

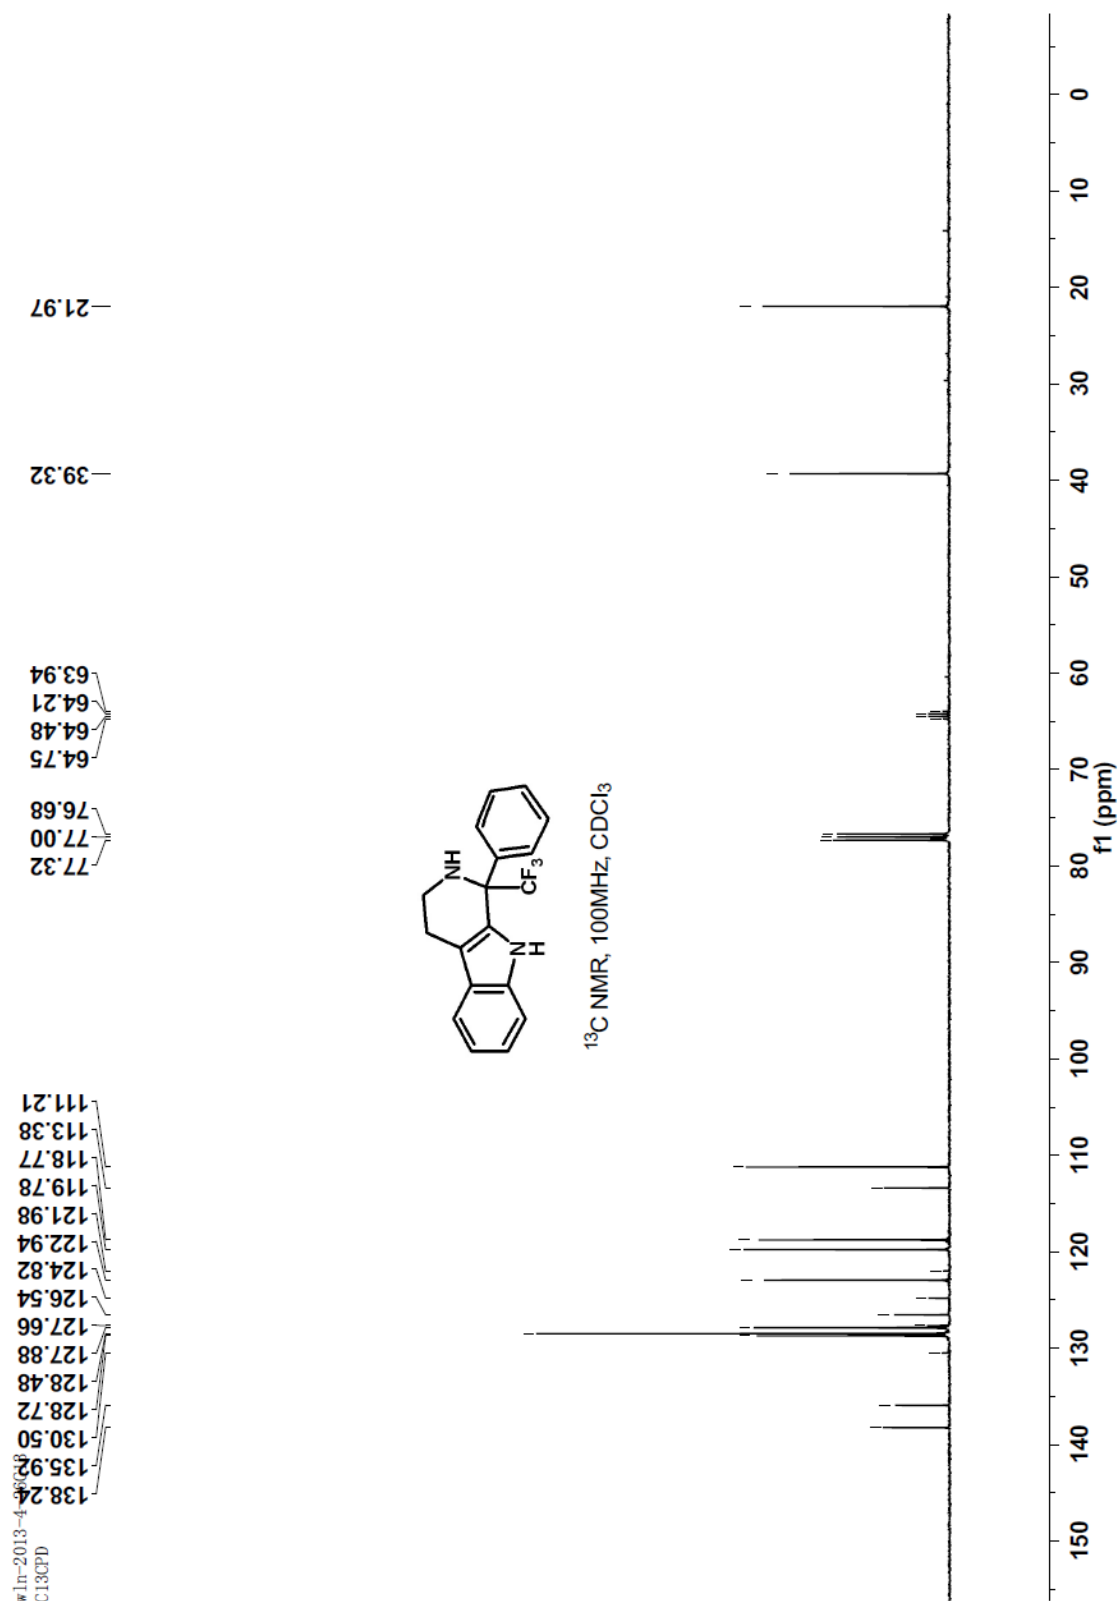



Methyl-(1-methyl-1,2,3,4-tetrahydro-β-carboline-1-yl) carboxylate (3l): <sup>1</sup>H NMR

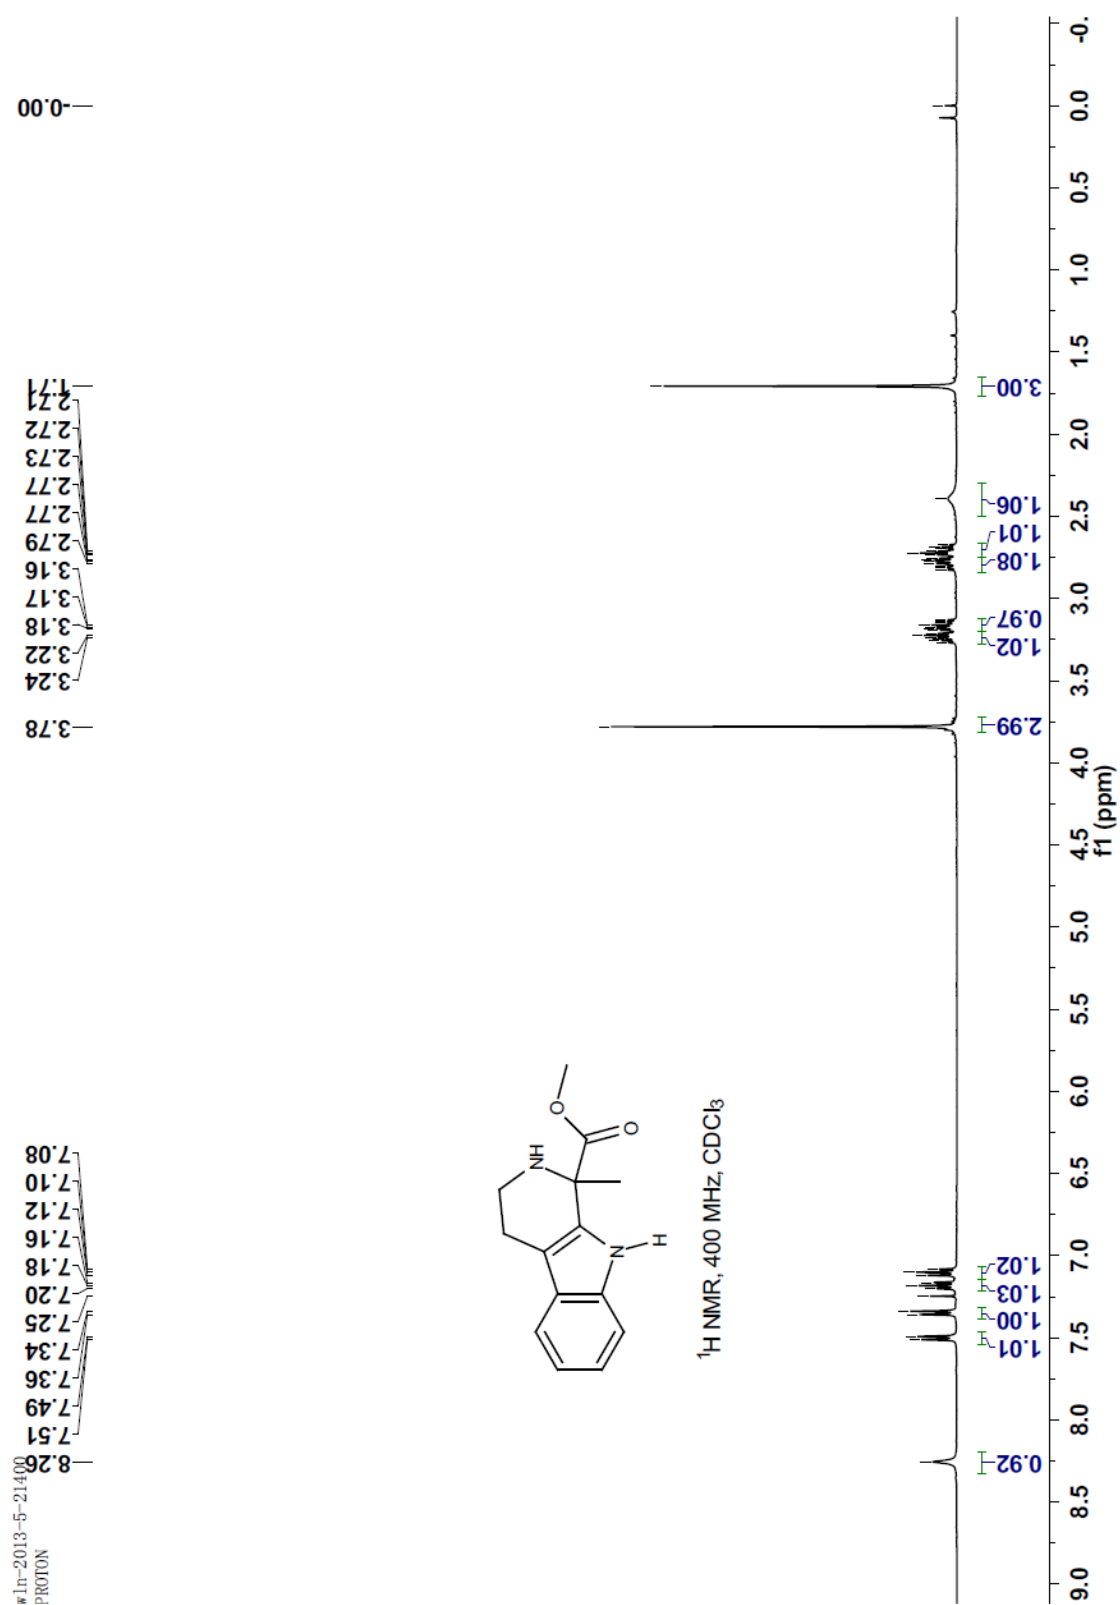

Methyl-(1-methyl-1,2,3,4-tetrahydro-β-carboline-1-yl) carboxylate (3l): <sup>13</sup>C NMR

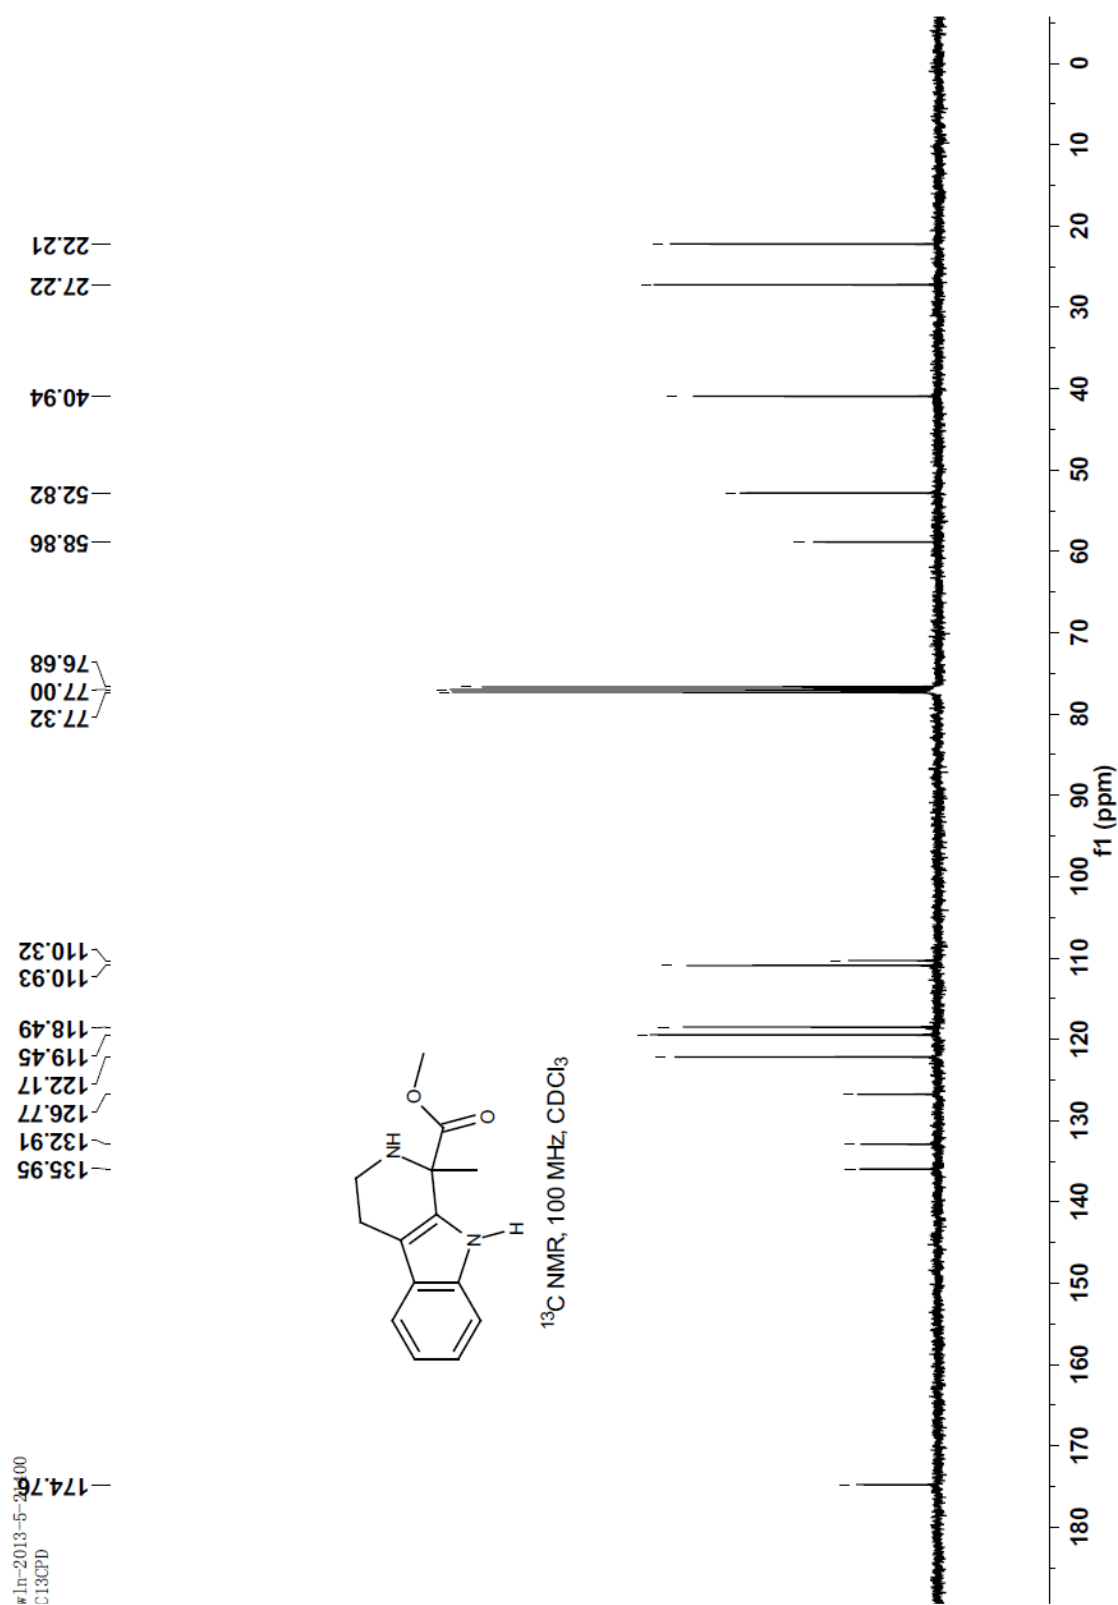

# 1-Methyl-1-(4-nitrophenyl)-1,2,3,4-tetrahydro-β-carboline (3m): <sup>1</sup>H NMR

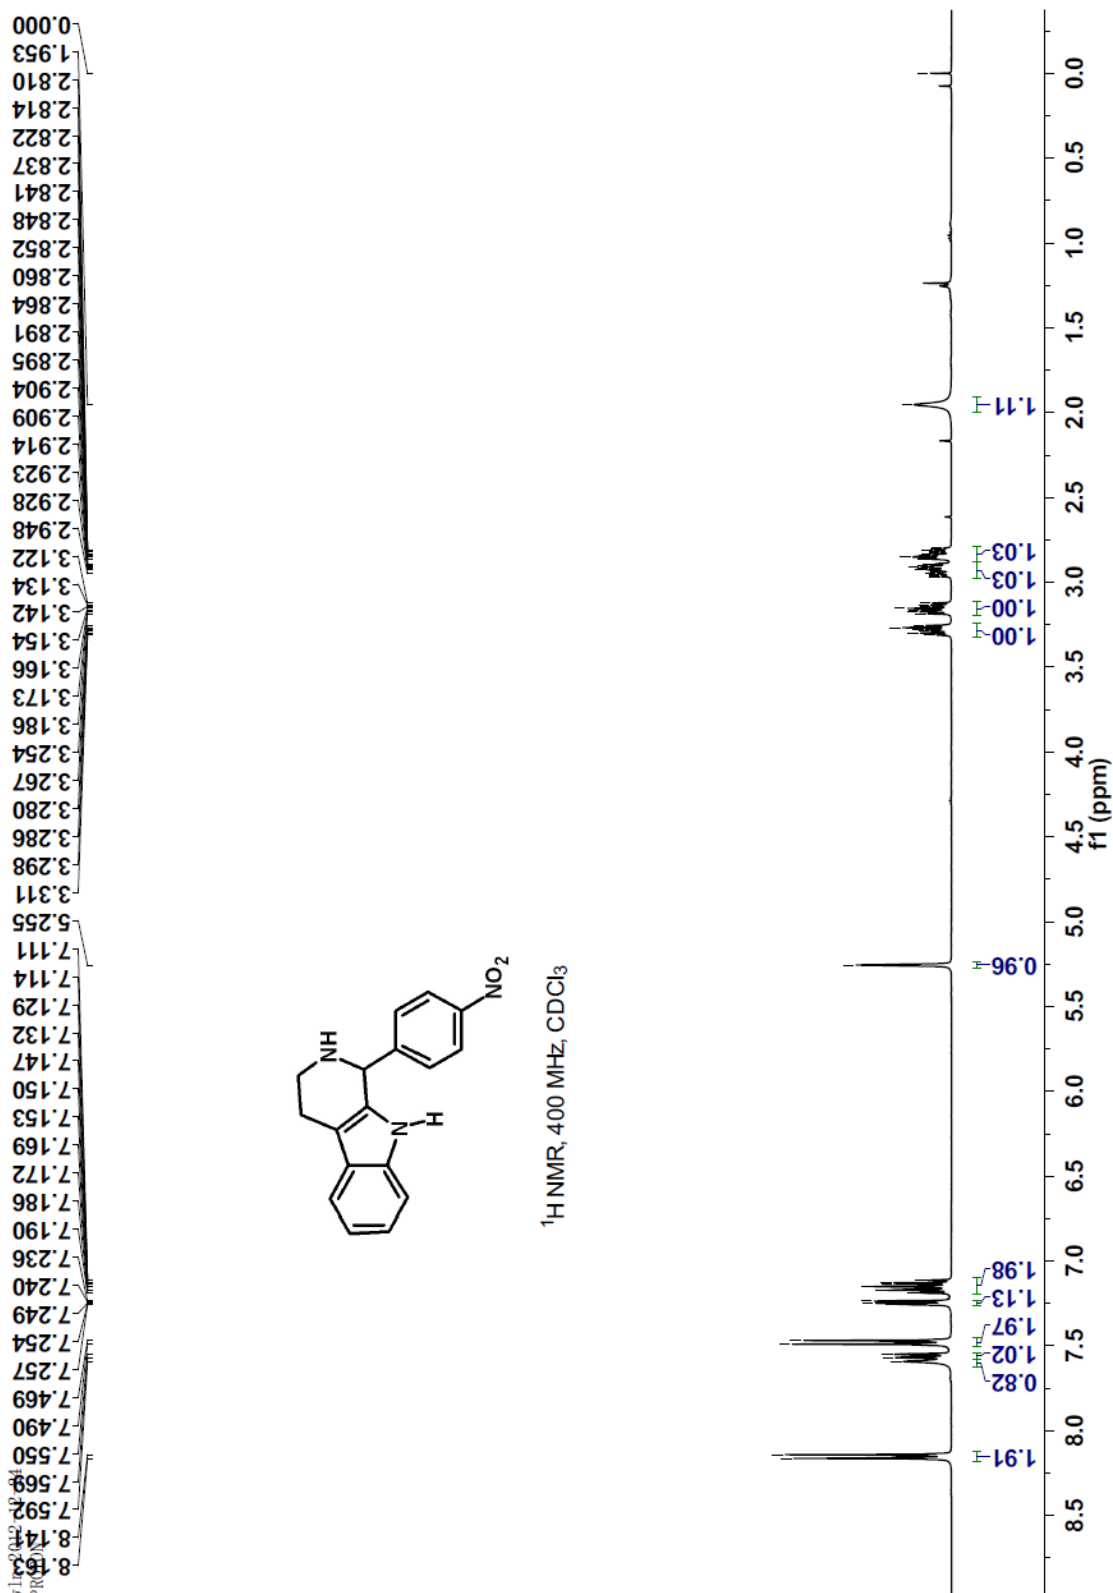

1-Methyl-1-(4-nitrophenyl)-1,2,3,4-tetrahydro-β-carboline (3m): <sup>13</sup>C NMR

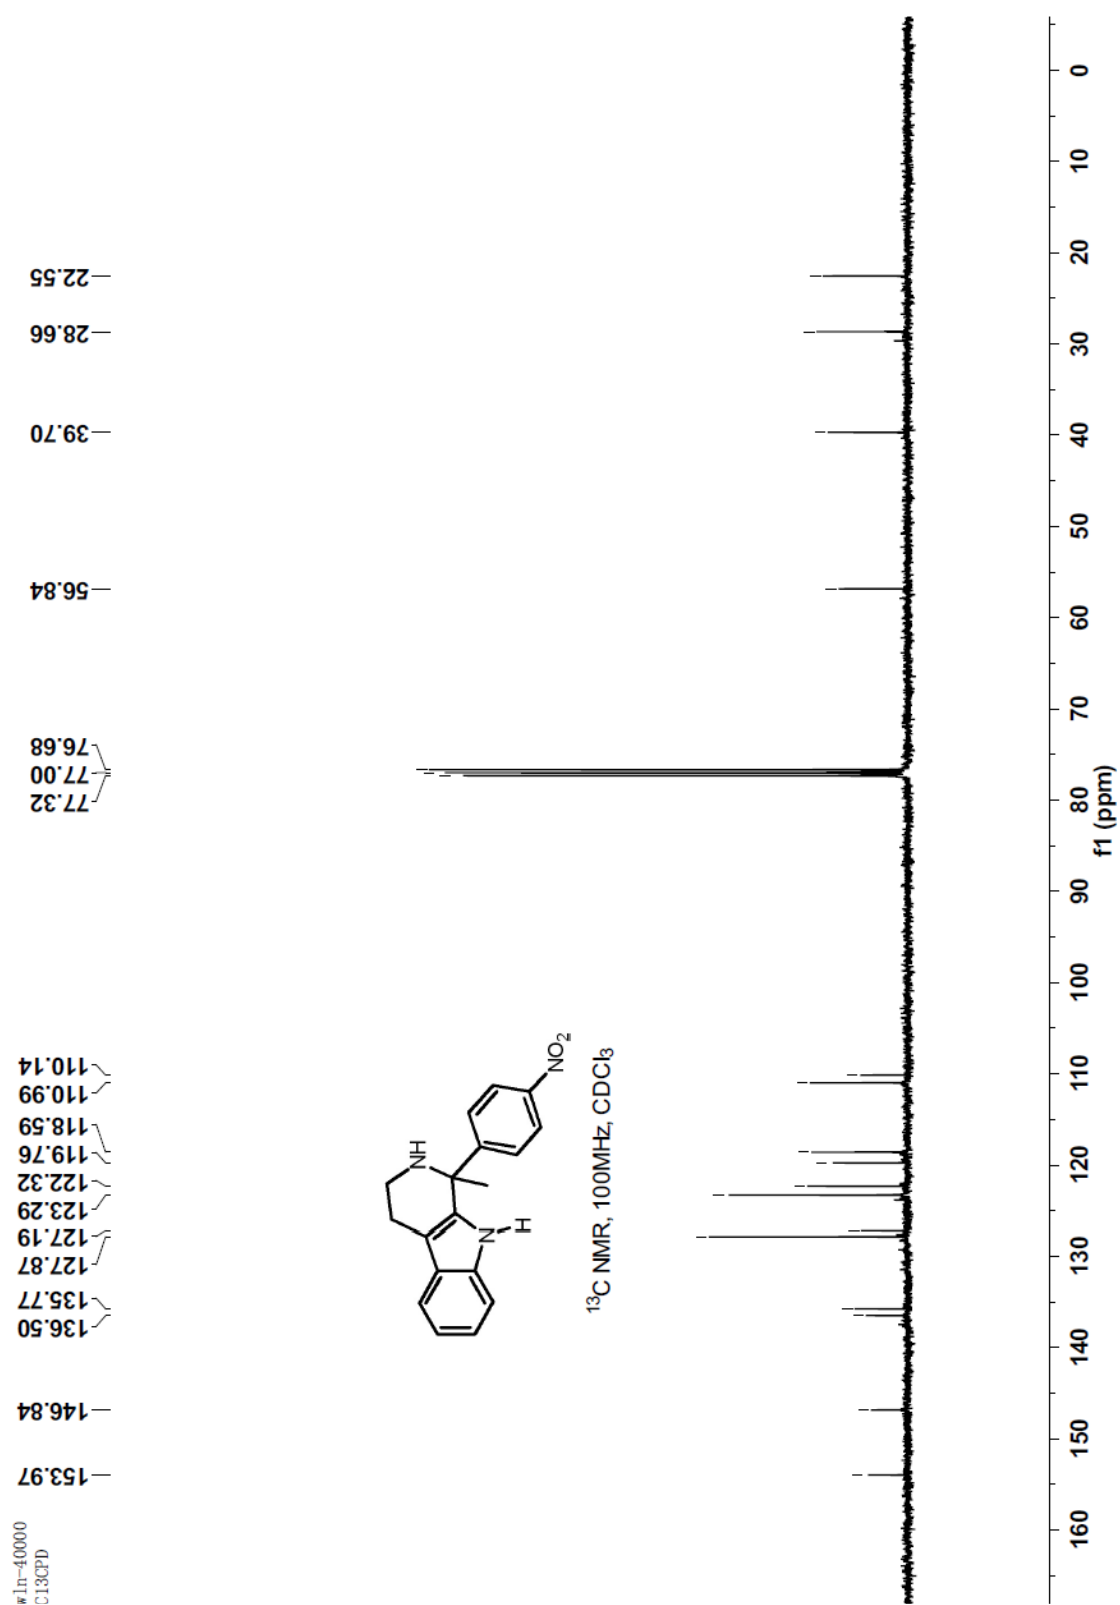

Ethyl-2-(1-methyl-1,2,3,4-tetrahydro-β-carboline-1-yl) acetate (3n): <sup>1</sup>H NMR

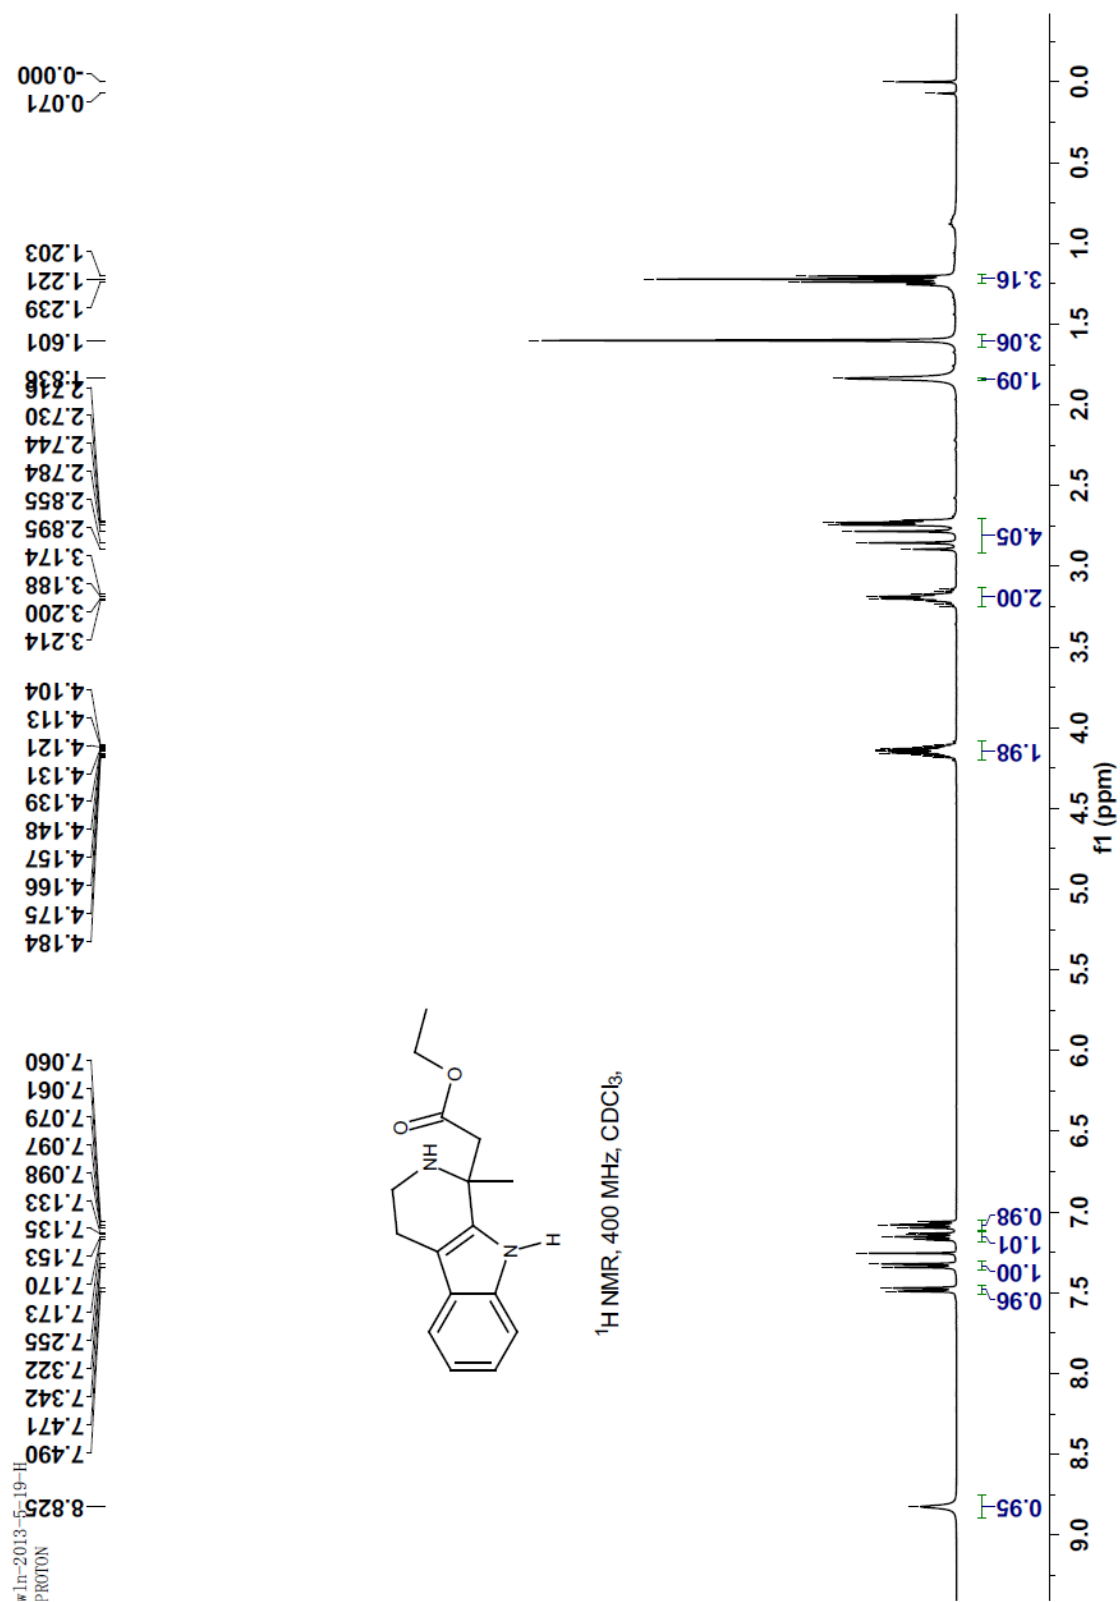

Ethyl-2-(1-methyl-1,2,3,4-tetrahydro-β-carboline-1-yl) acetate (3n): <sup>13</sup>C NMR

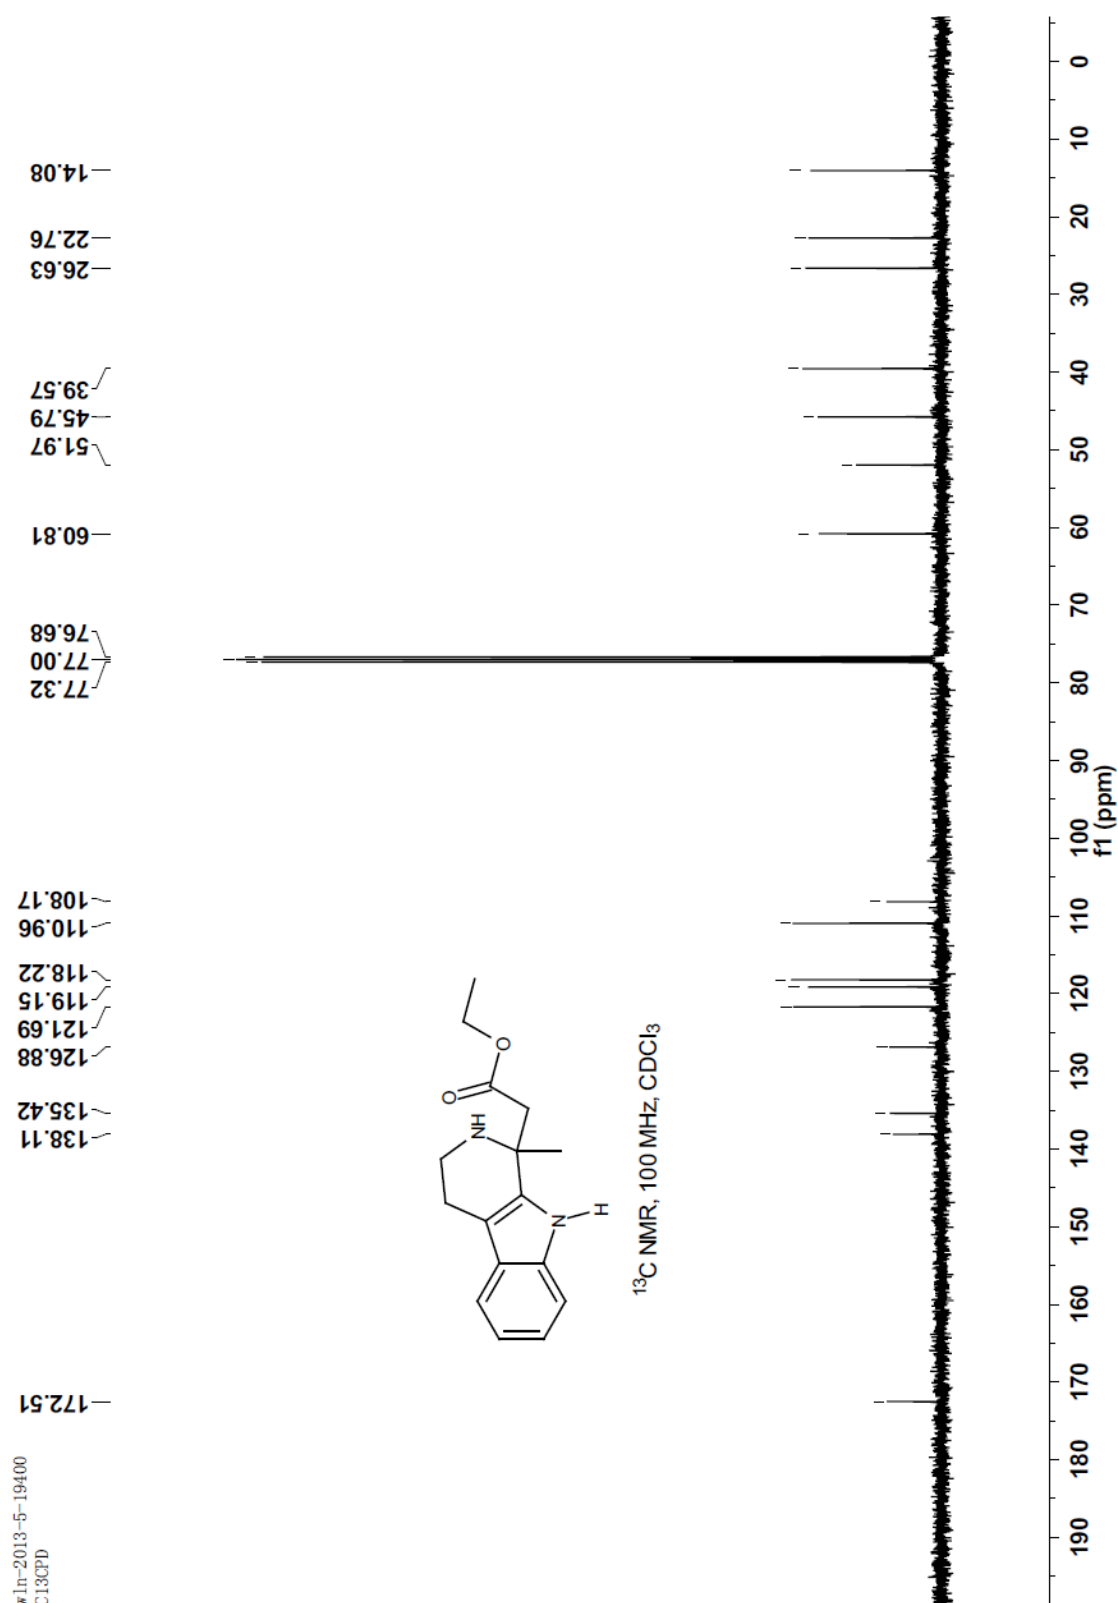

# 1-(4-Nitrophenyl)-1,2,3,4-tetrahydroisoquinoline-6,7-diol (3o): <sup>1</sup>H NMR

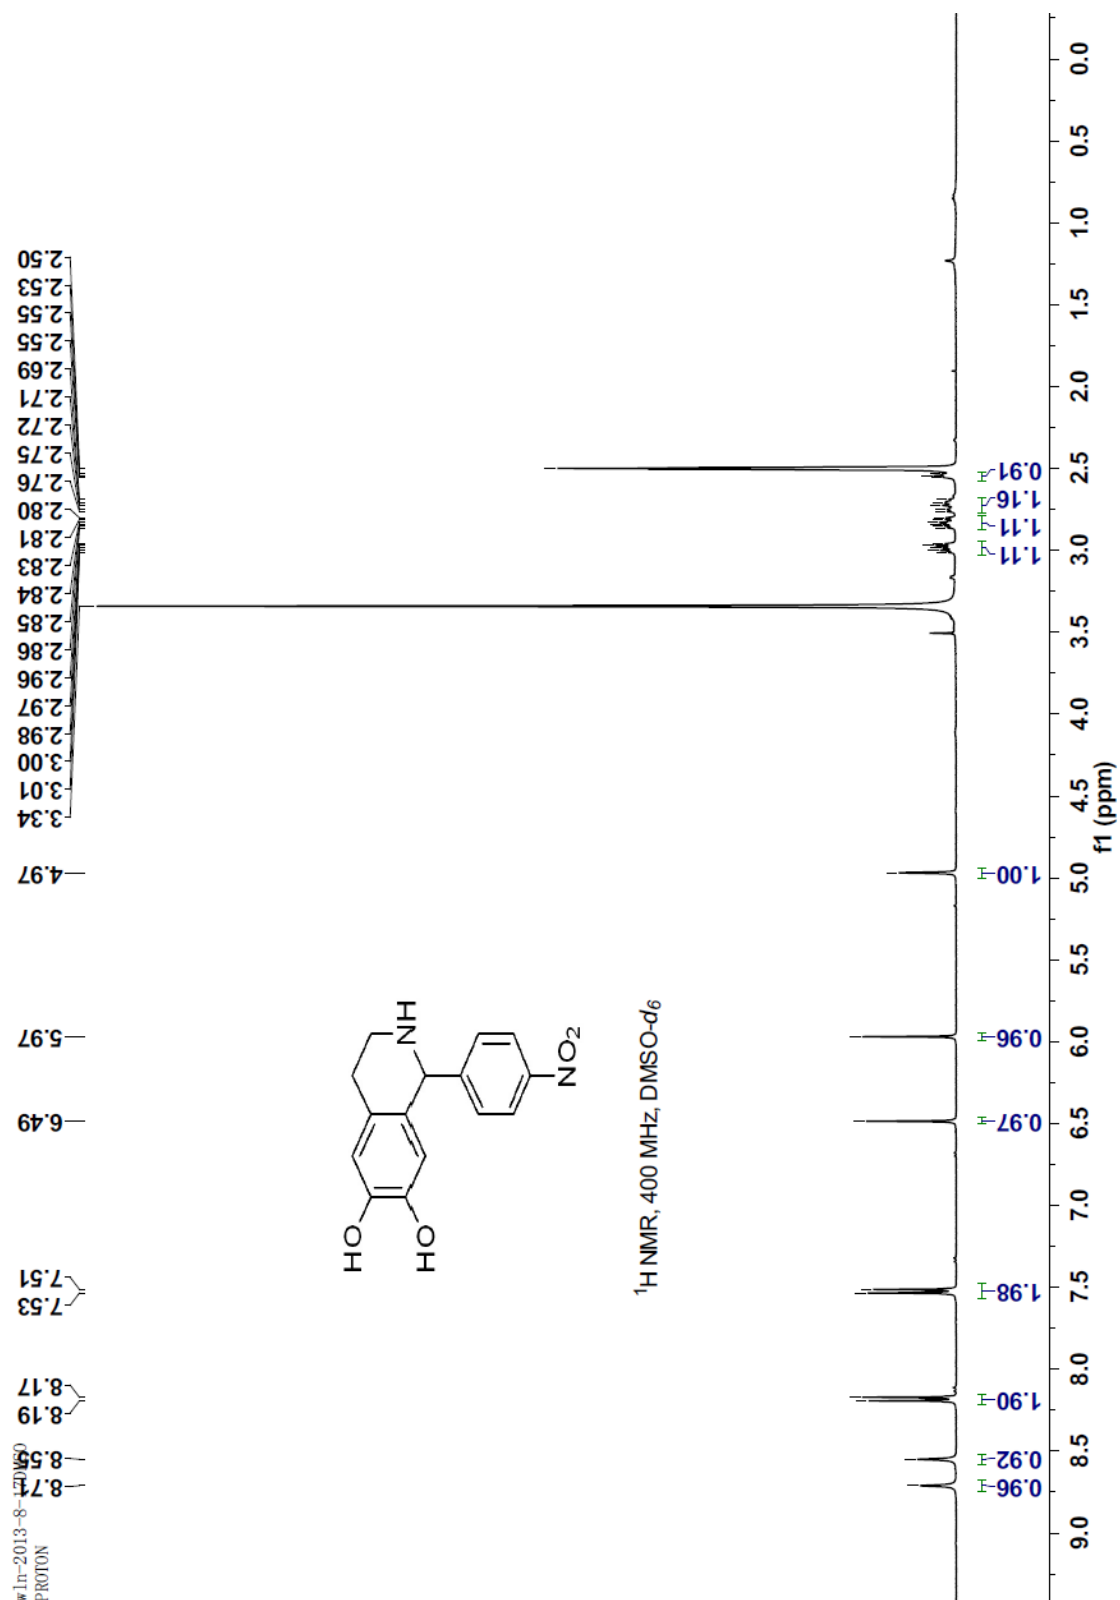

# 1-(4-Nitrophenyl)-1,2,3,4-tetrahydroisoquinoline-6,7-diol (3o) : $^{13}\text{C}$ NMR

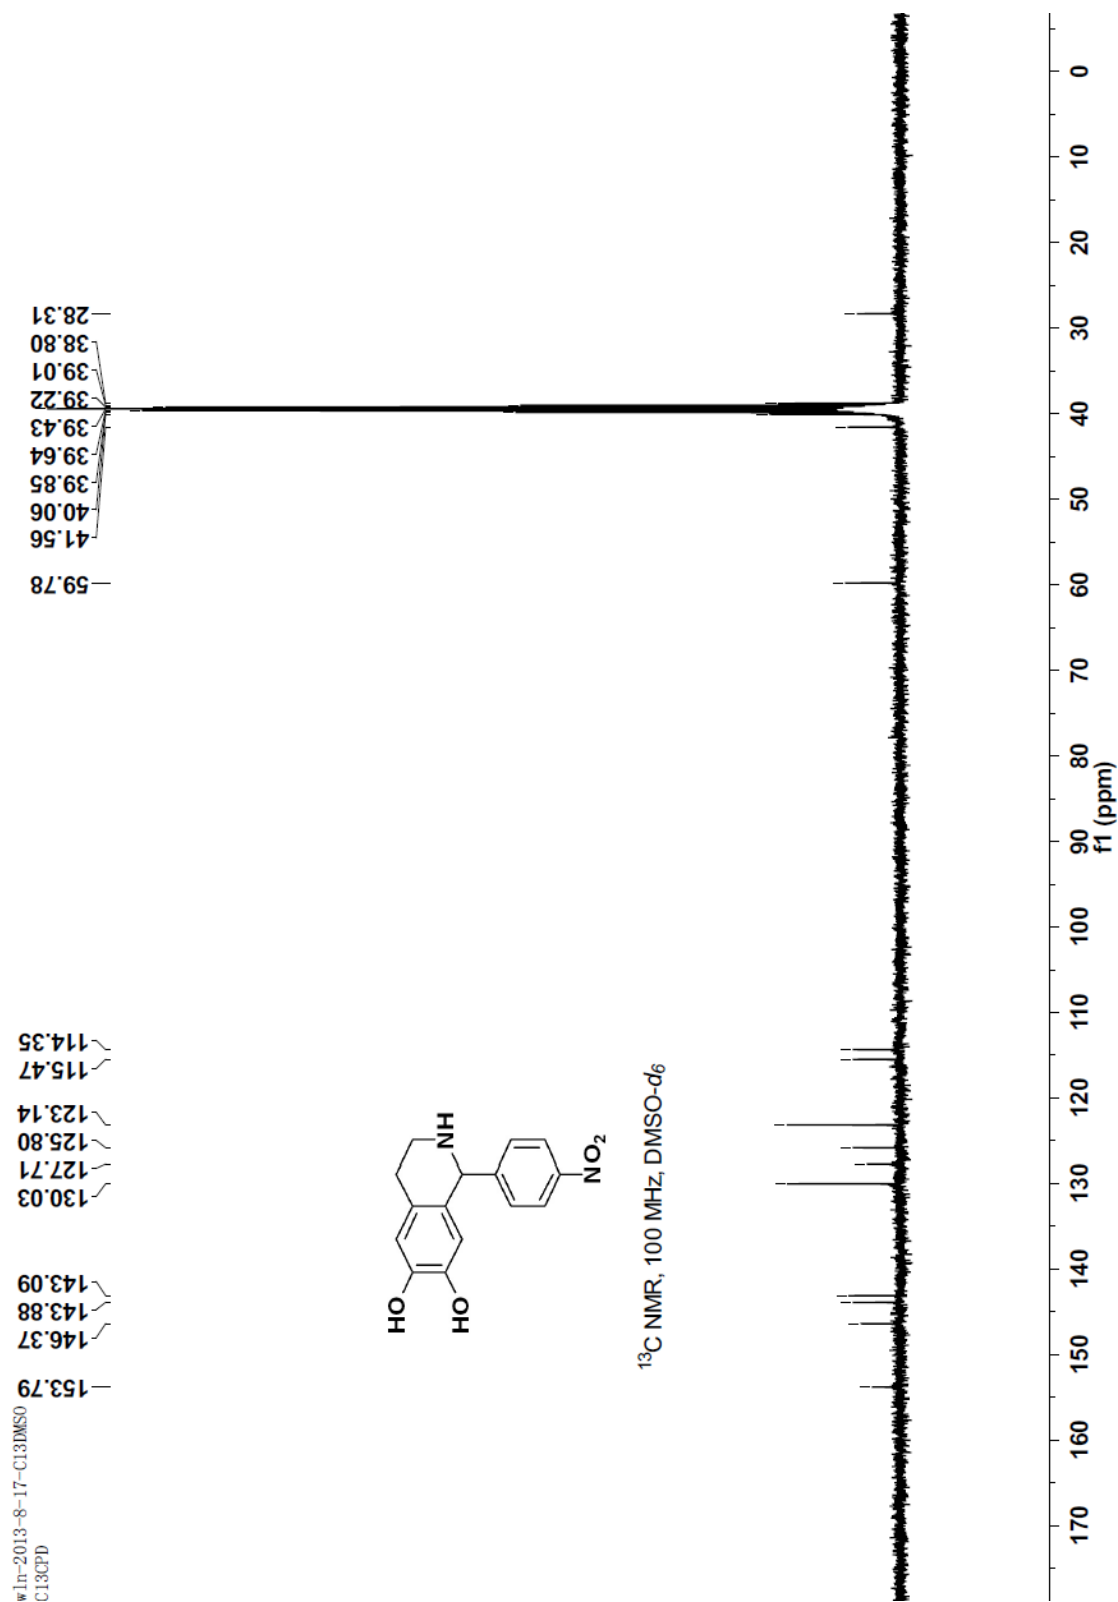



# 1-(4-Nitrophenyl)-6-hydroxy-7-methoxy-1,2,3,4-tetrahydroisoquinoline (3p): <sup>1</sup>H NMR

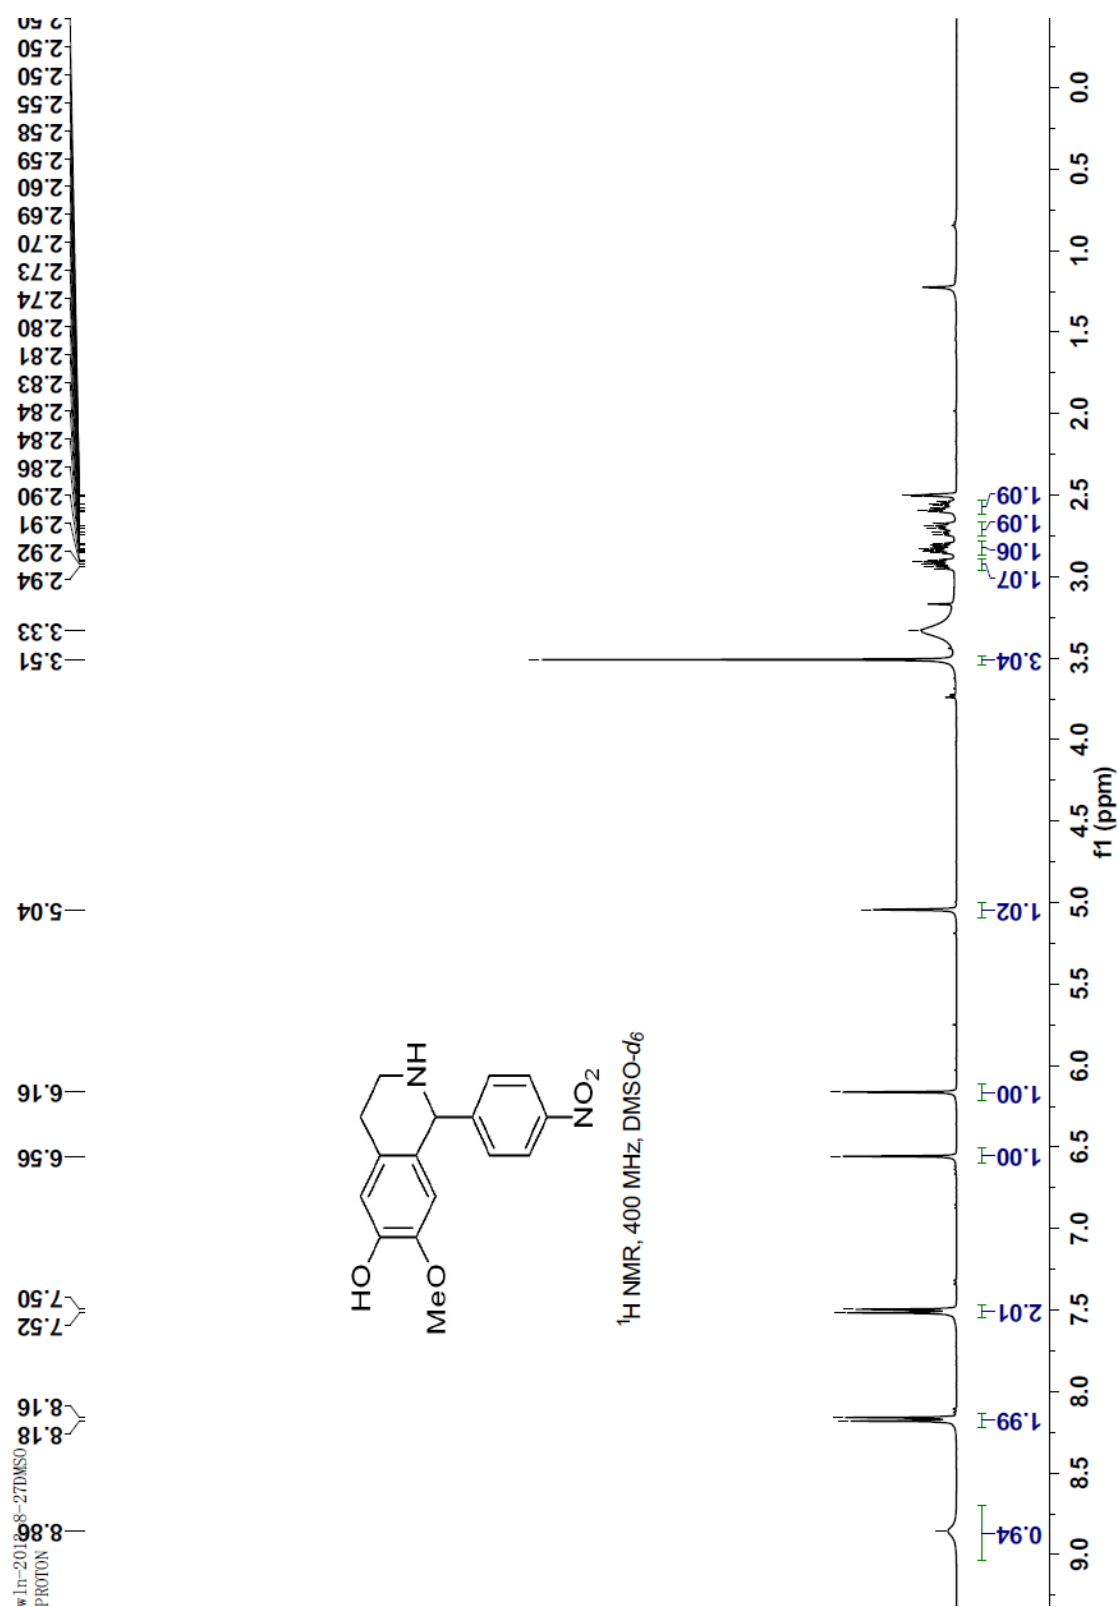

1-(4-Nitrophenyl)-6-hydroxy-7-methoxy-1,2,3,4-tetrahydroisoquinoline (3p):  $^{13}\text{C}$  NMR

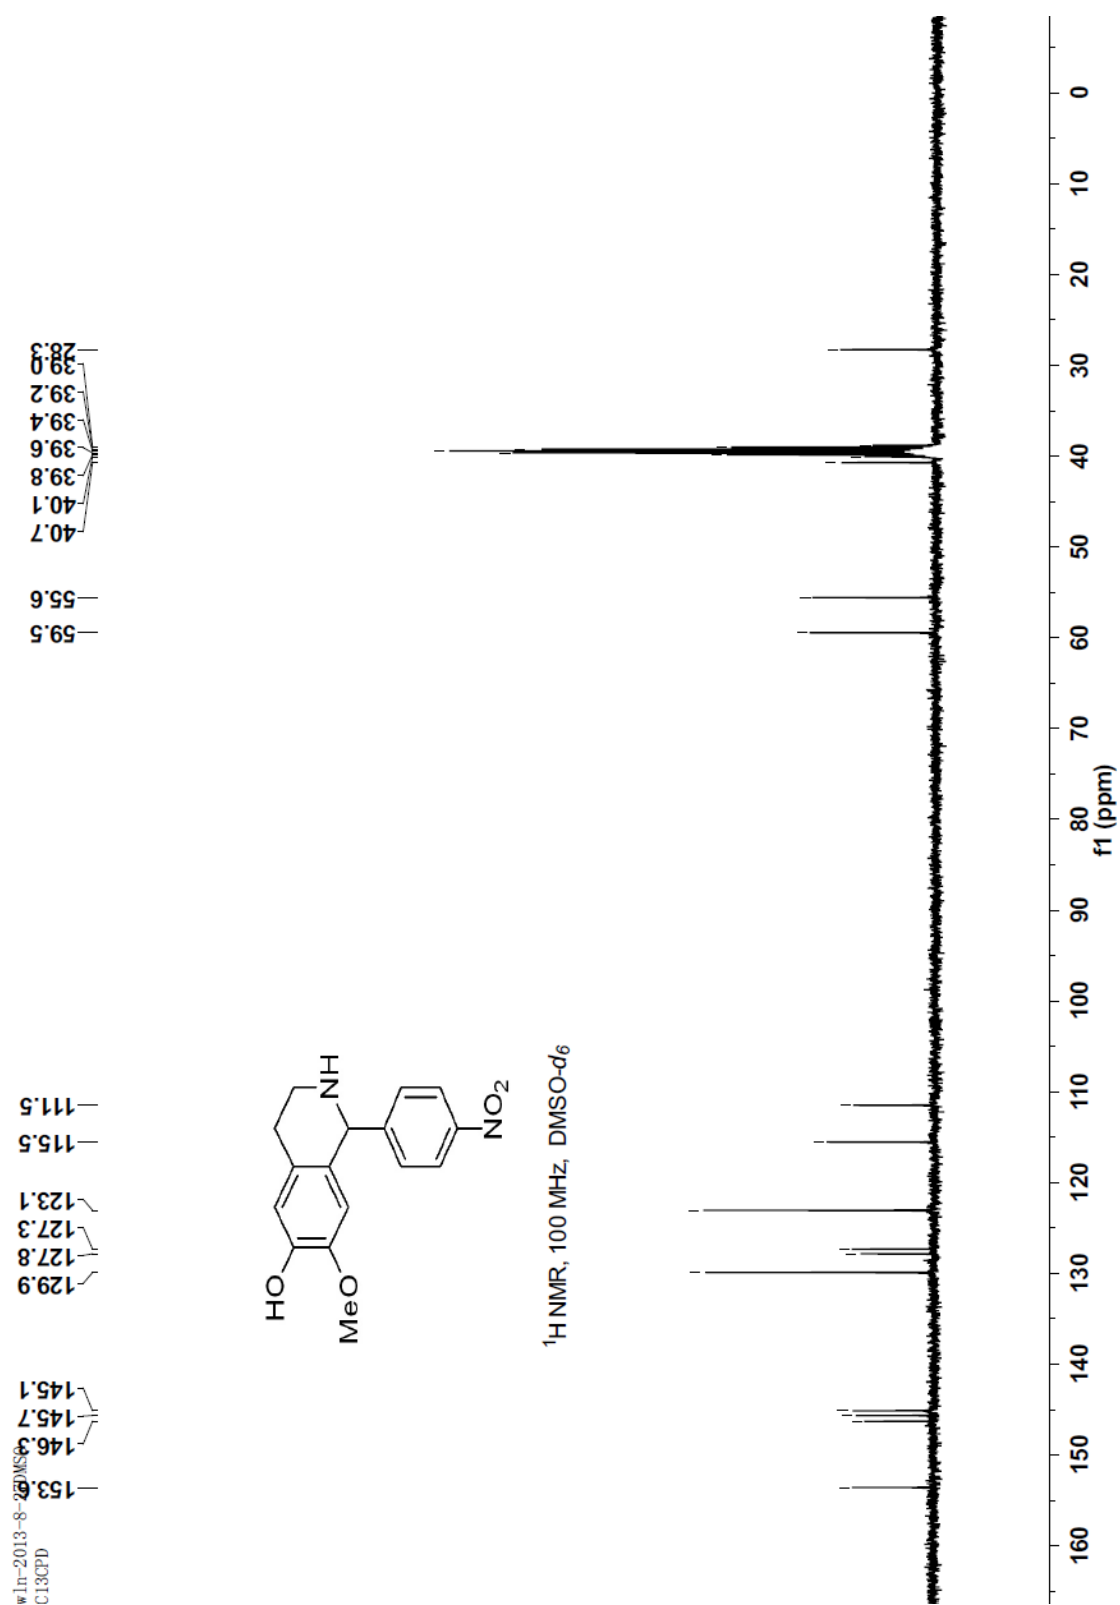

# 1-(*p*-Nitrophenyl)-3-methoxycarbonyl-1,2,3,4-tetrahydro- $\beta$ -carboline (3q):

*cis*-3q:  $^1\text{H}$  NMR

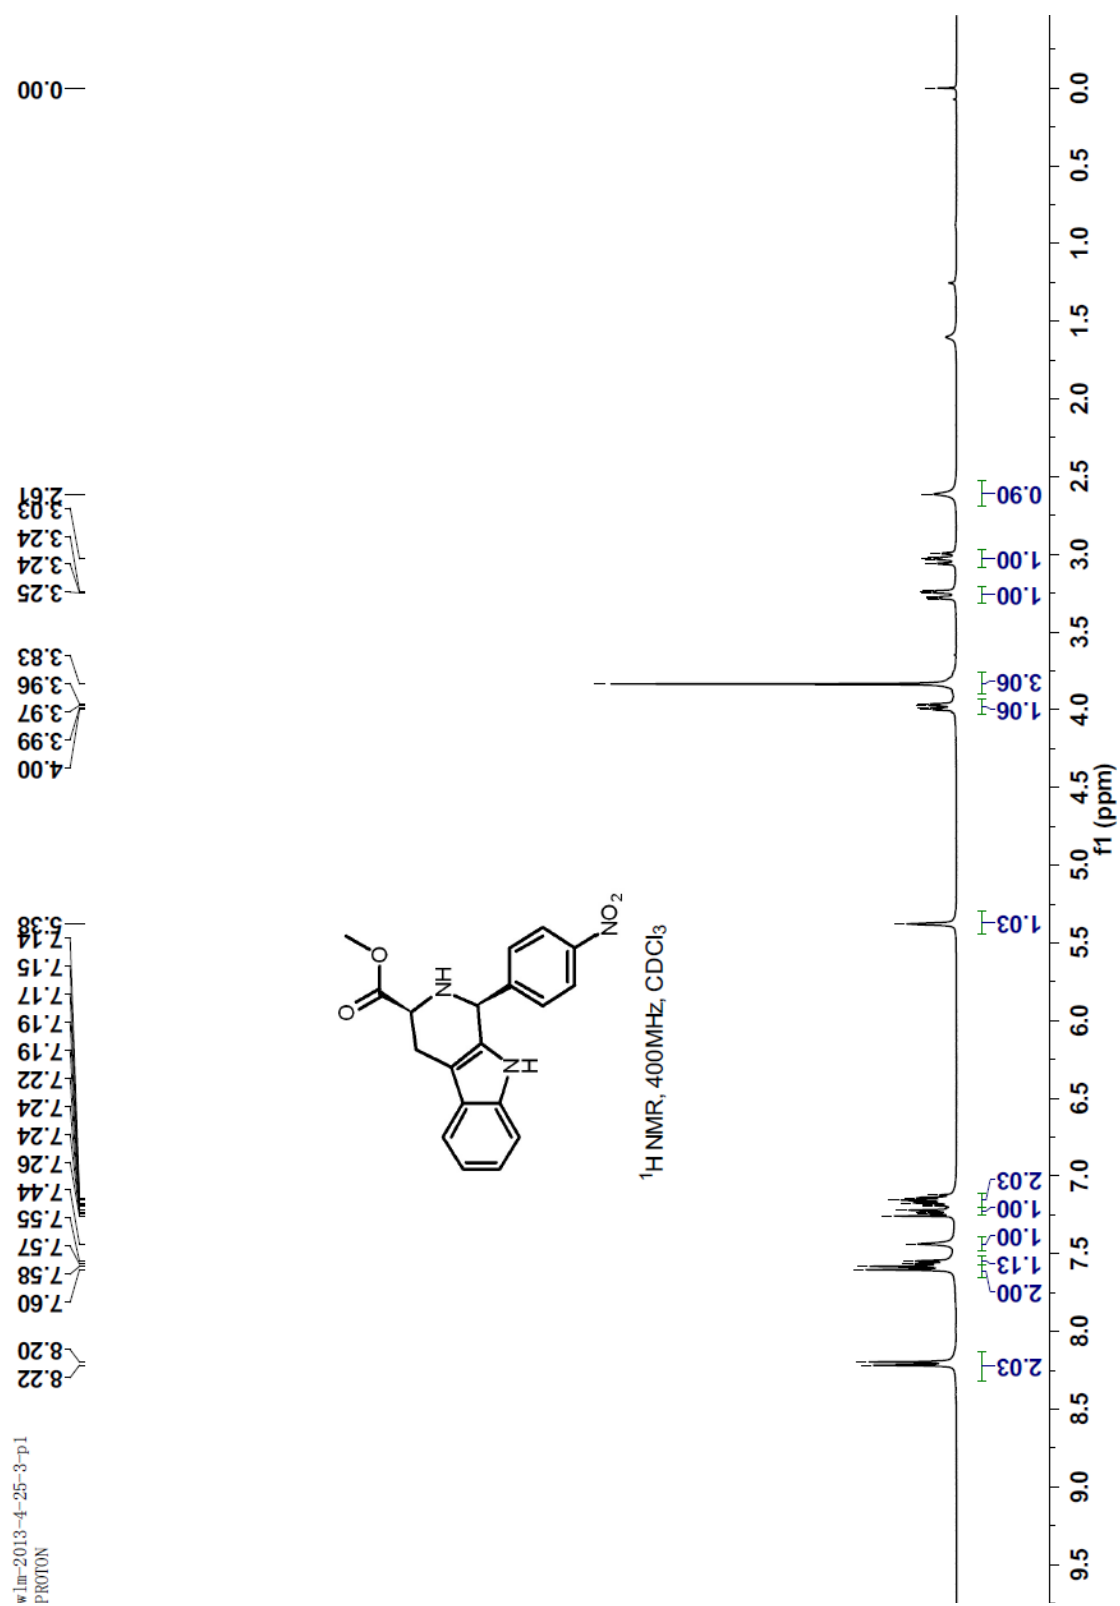

*cis*-3q:  $^{13}\text{C}$  NMR

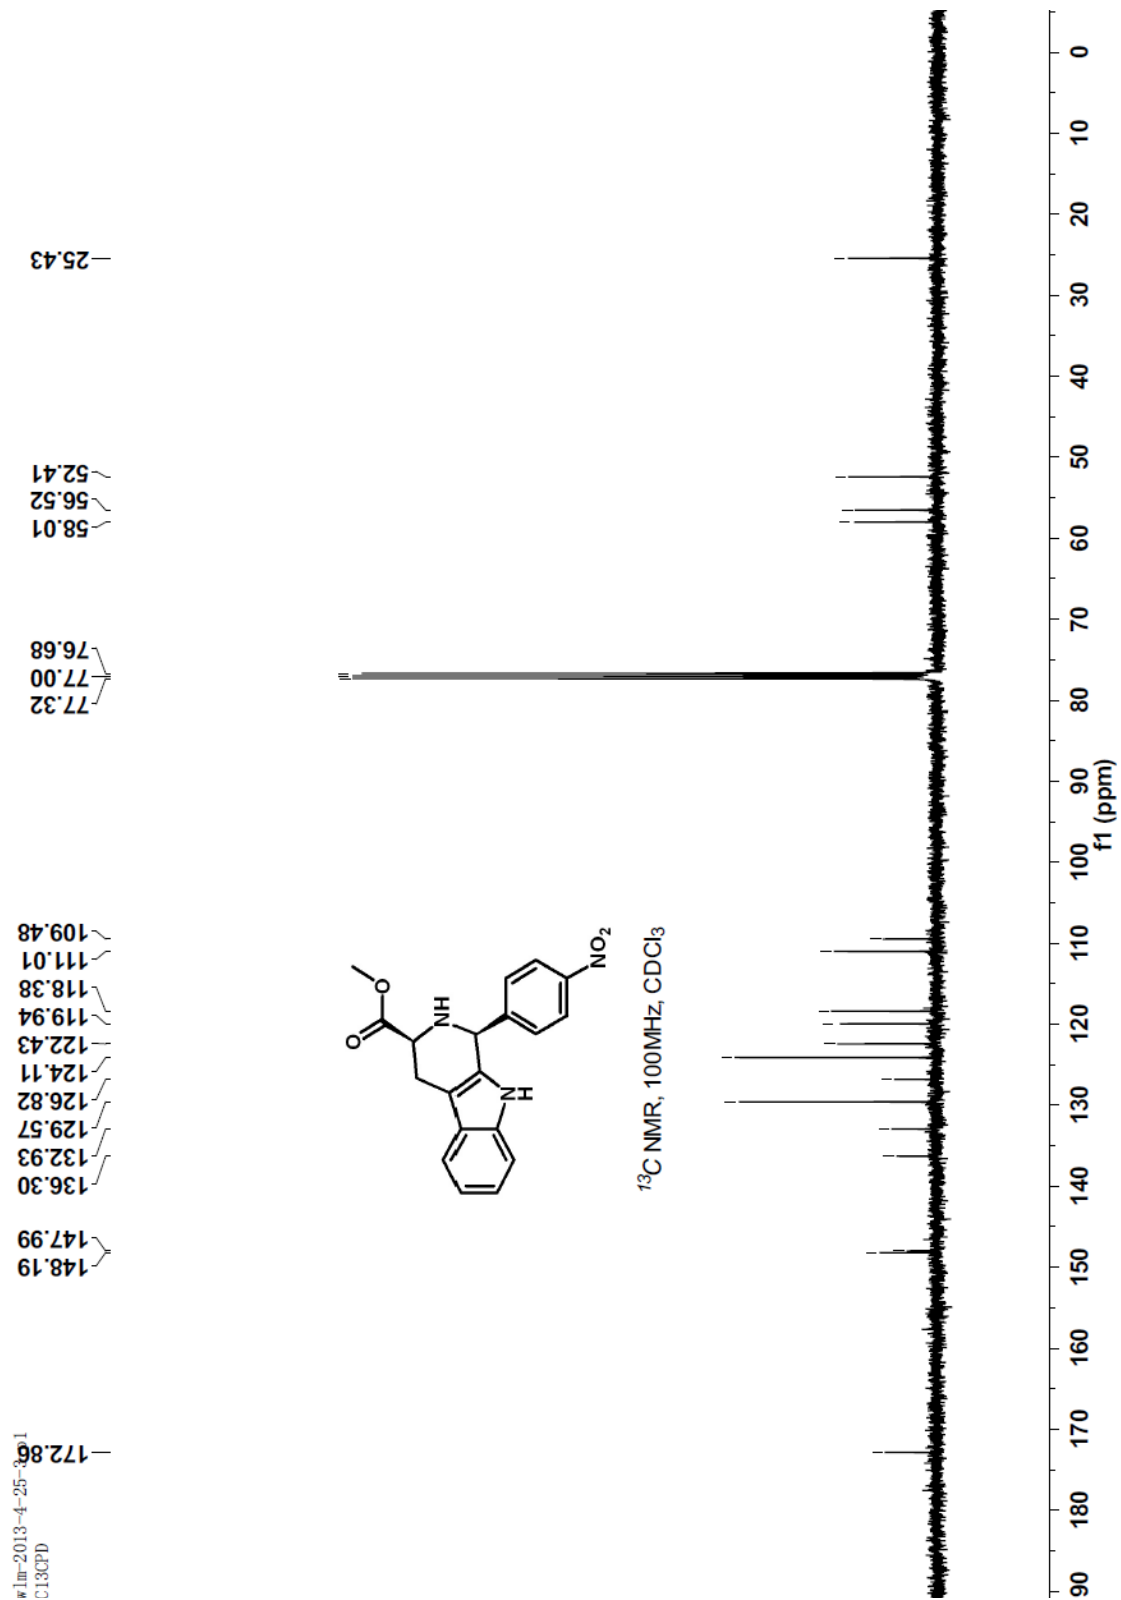

*trans*-3q: <sup>1</sup>H NMR

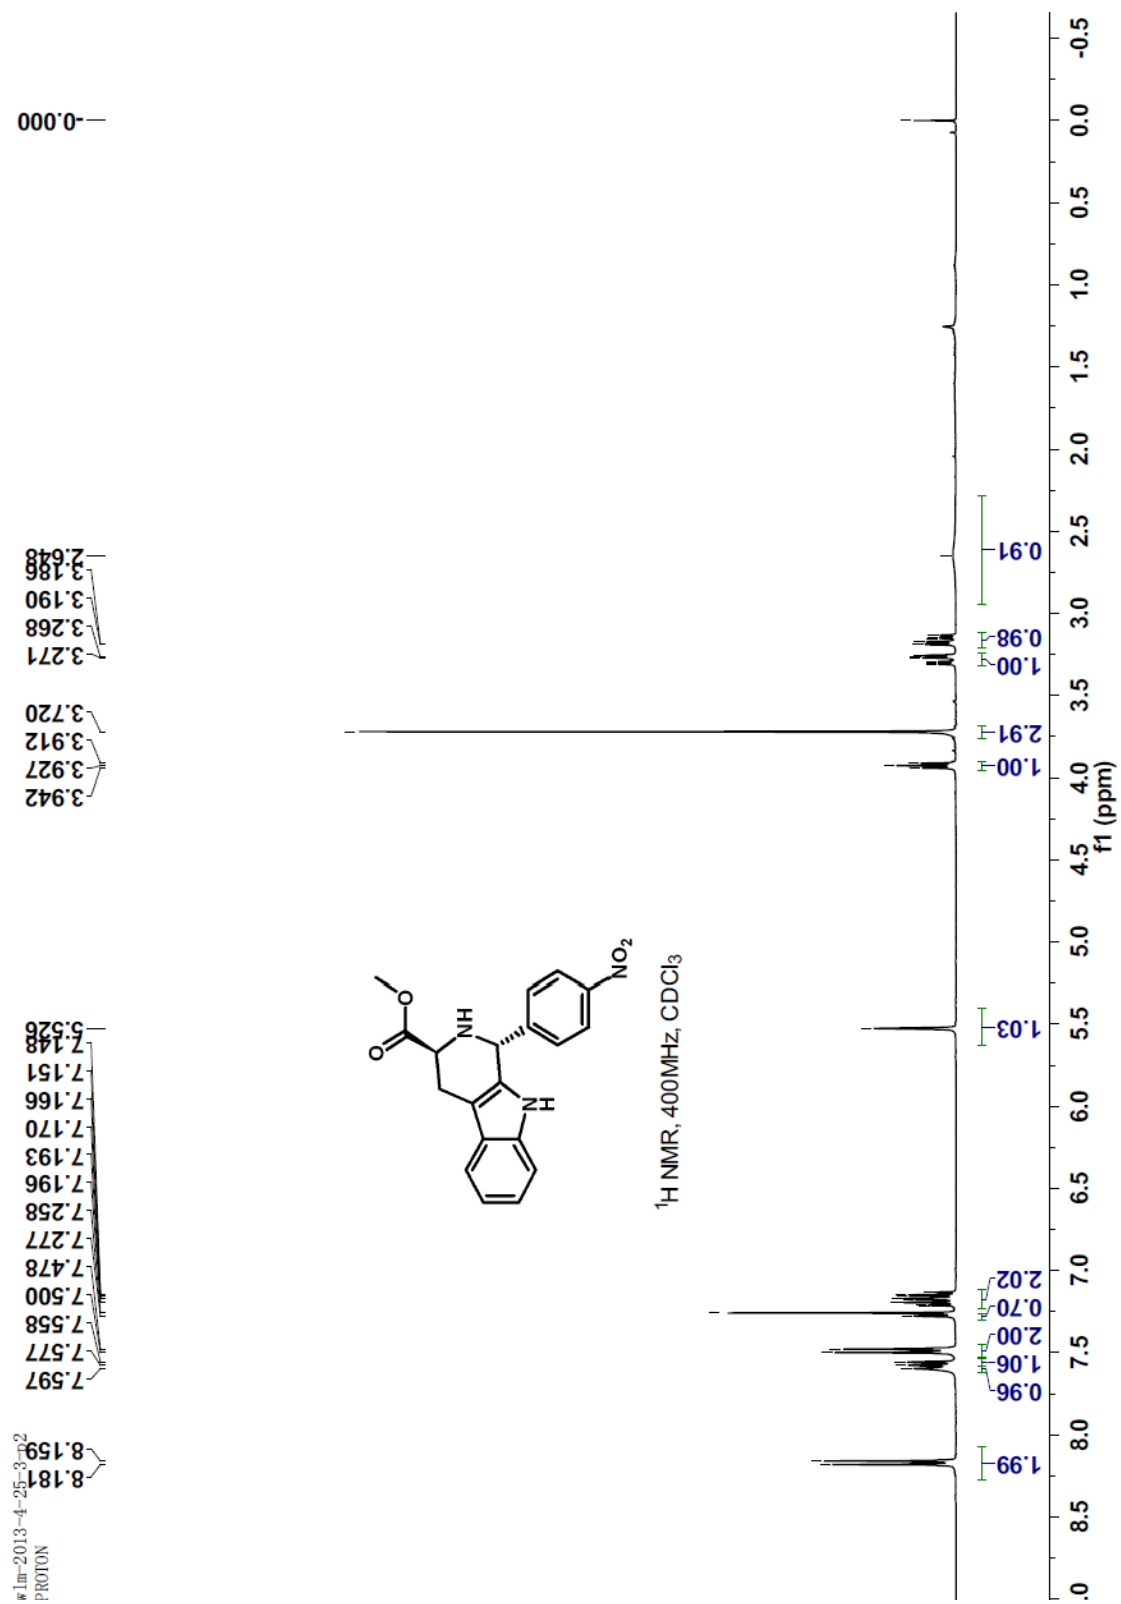

*trans*-3q:  $^{13}\text{C}$  NMR

#1n-2013-4-5p2e13  
C13CPD

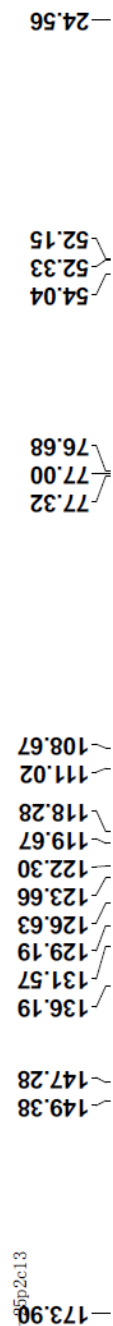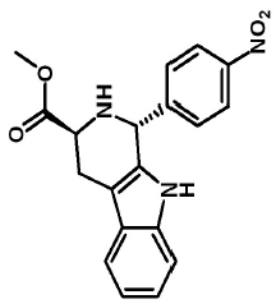

$^{13}\text{C}$  NMR, 400MHz,  $\text{CDCl}_3$

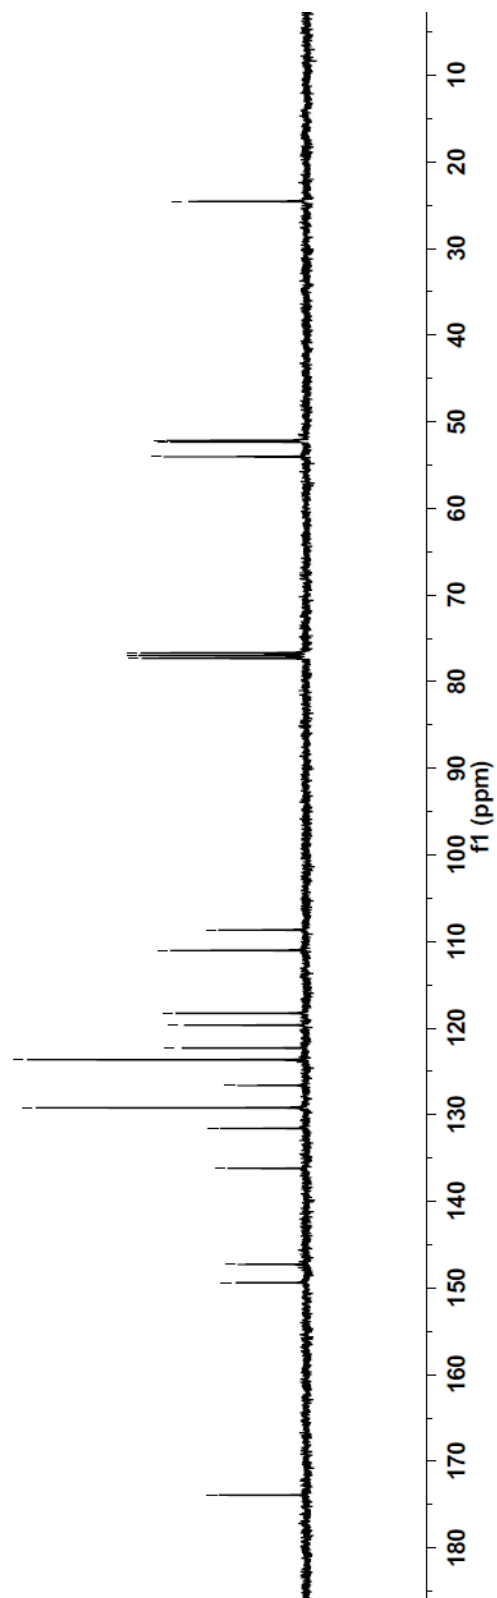

# 1-Phenyl-3-methoxycarbonyl-1,2,3,4-tetrahydro-β-carboline (3r):

*cis*-3r:  $^1\text{H}$  NMR

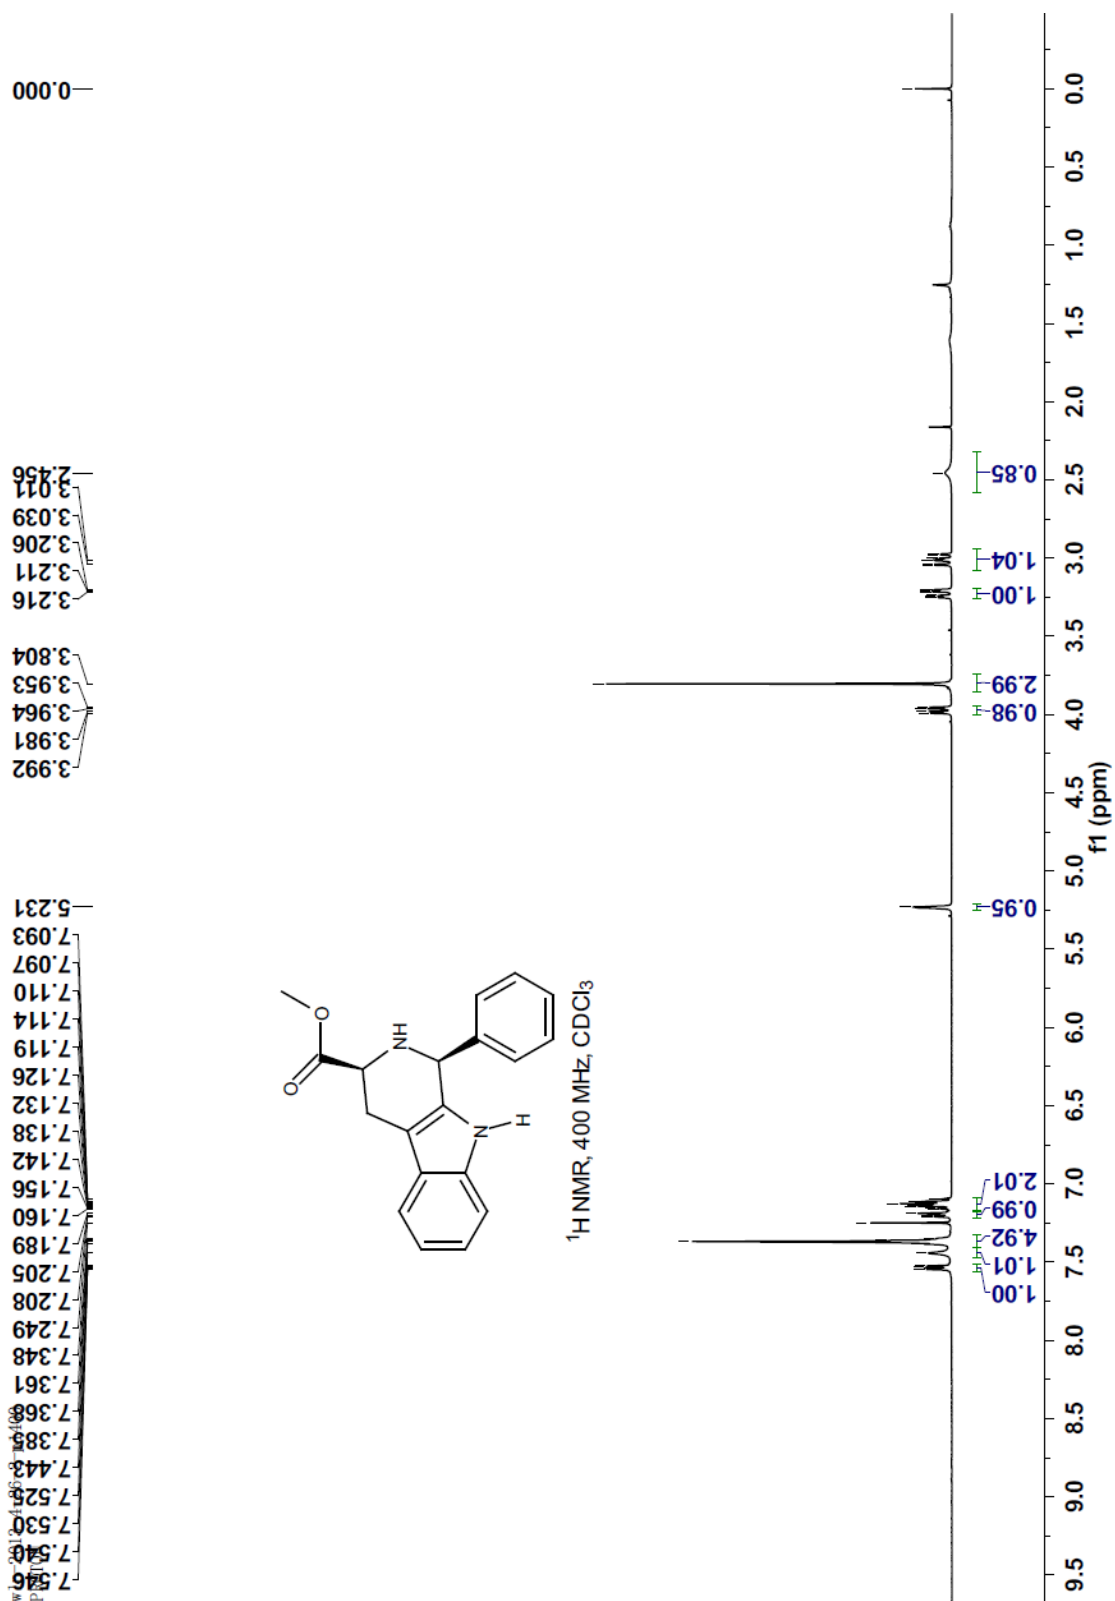

*cis*-3r:  $^{13}\text{C}$  NMR

#1n-2013-4-26pic  
C13CPD

173.16  
140.50  
136.07  
134.48  
128.94  
128.59  
126.99  
121.93  
119.59  
118.15  
110.90  
108.83  
77.32  
77.00  
76.68  
58.56  
56.77  
52.25  
25.63

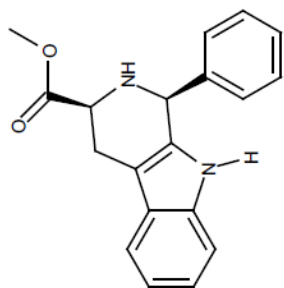

$^1\text{H}$  NMR, 100 MHz,  $\text{CDCl}_3$

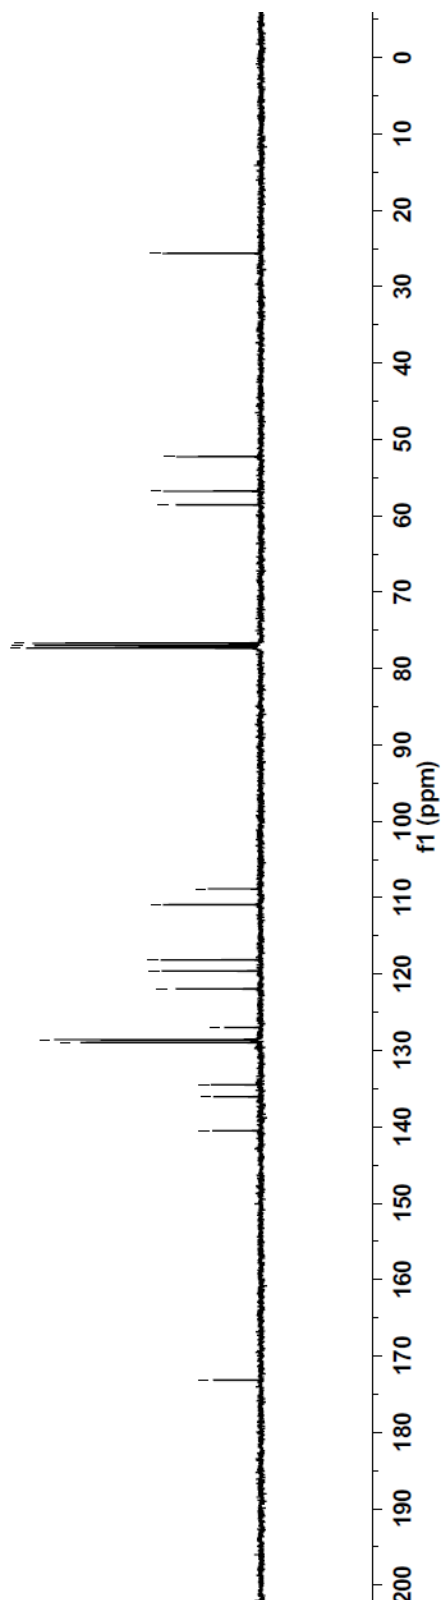



*trans*-**3r**:  $^{13}\text{C}$  NMR

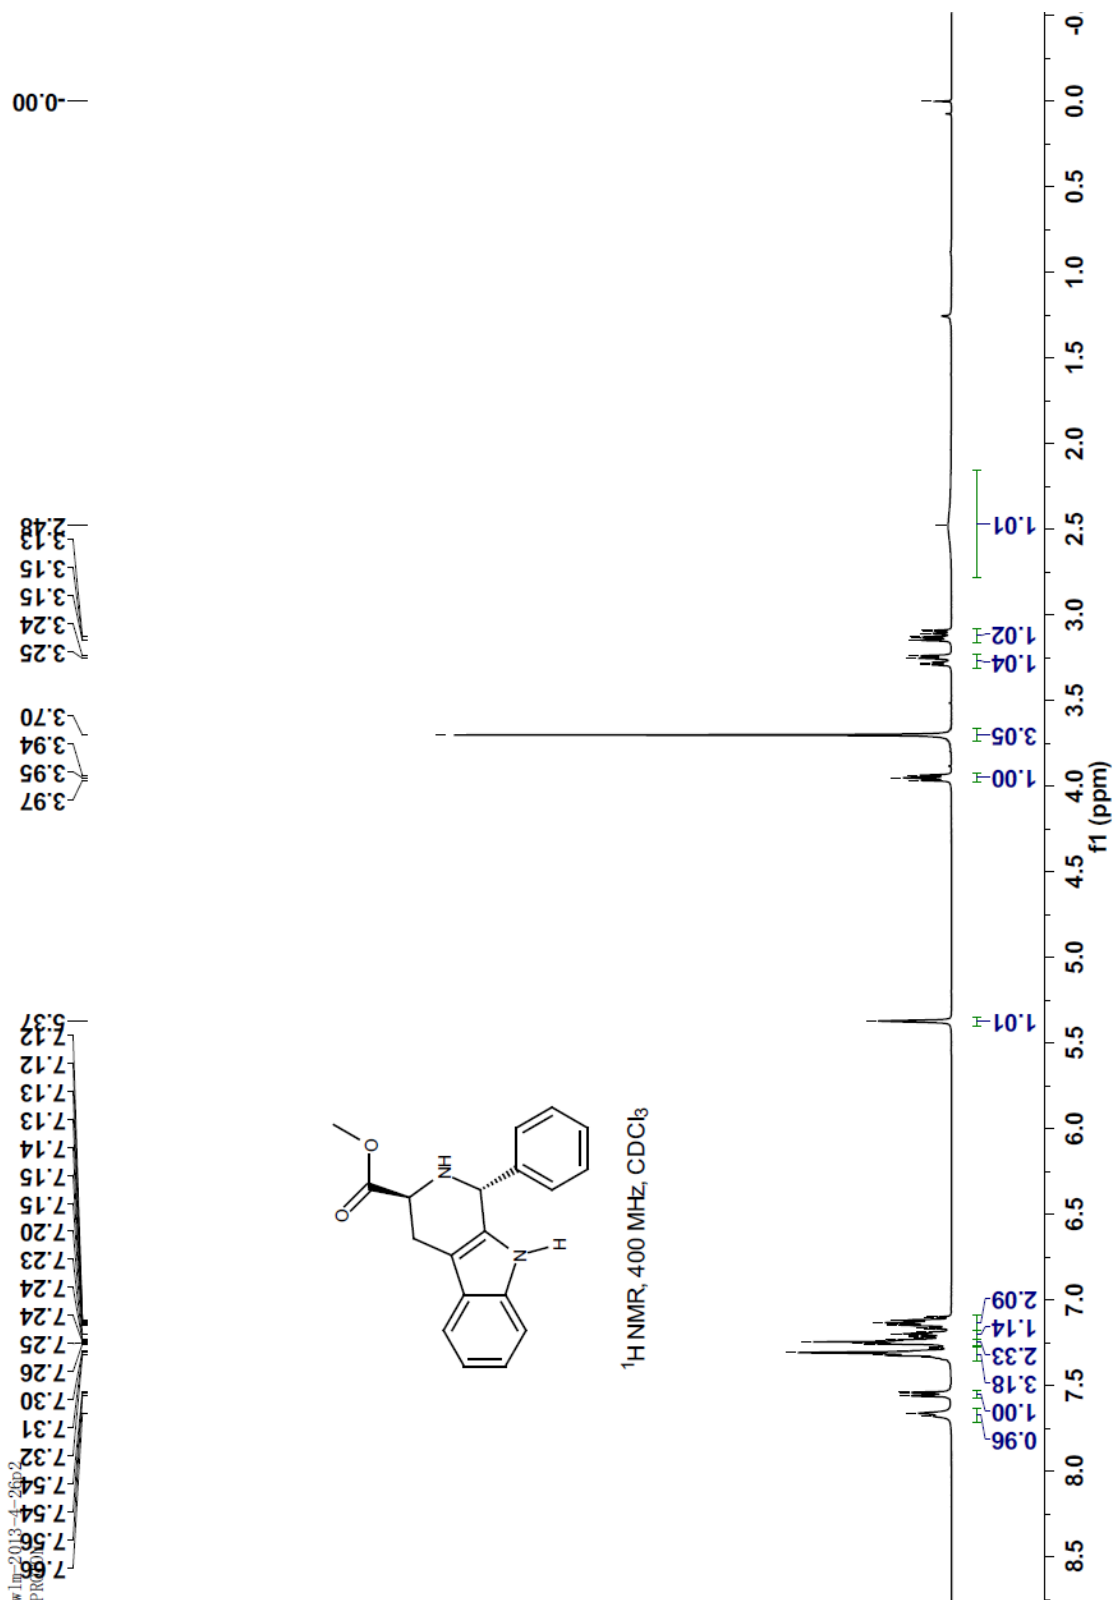

*trans*-3r:  $^{13}\text{C}$  NMR

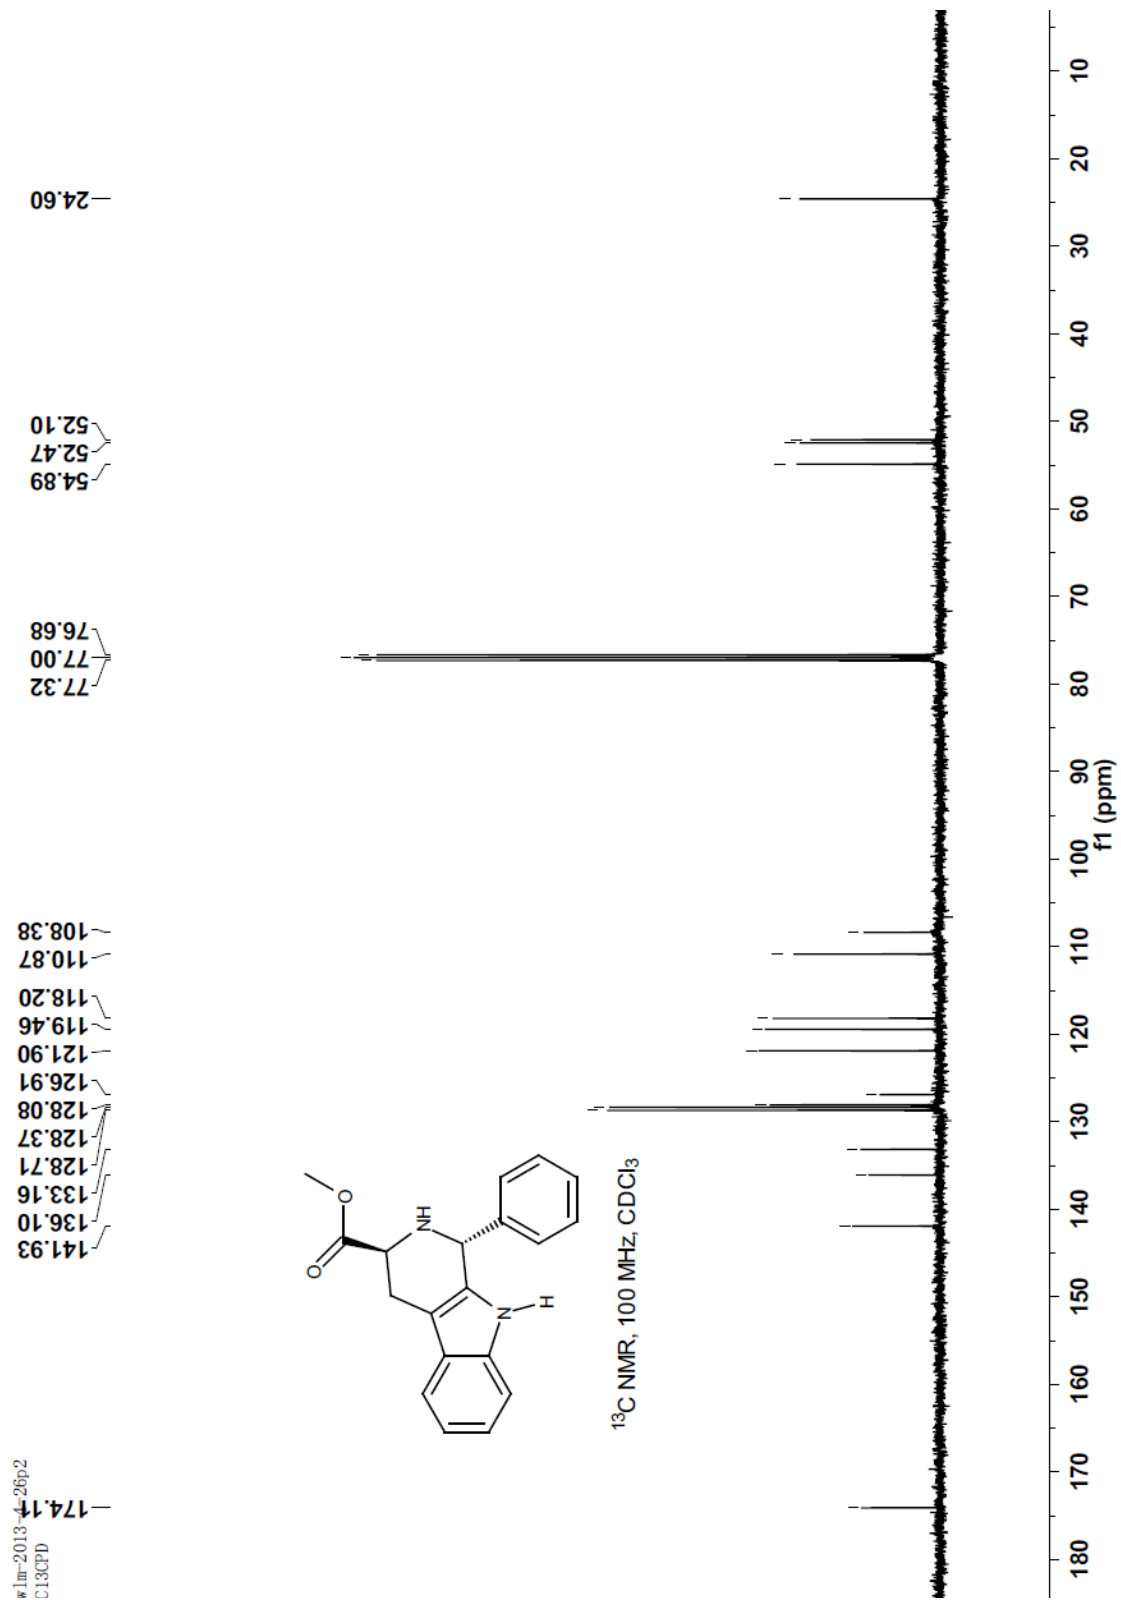

# 1-(*p*-Bromophenyl)-3-methoxycarbonyl-1,2,3,4-tetrahydro- $\beta$ -carboline (3s):

*cis*-3s:  $^1\text{H}$  NMR

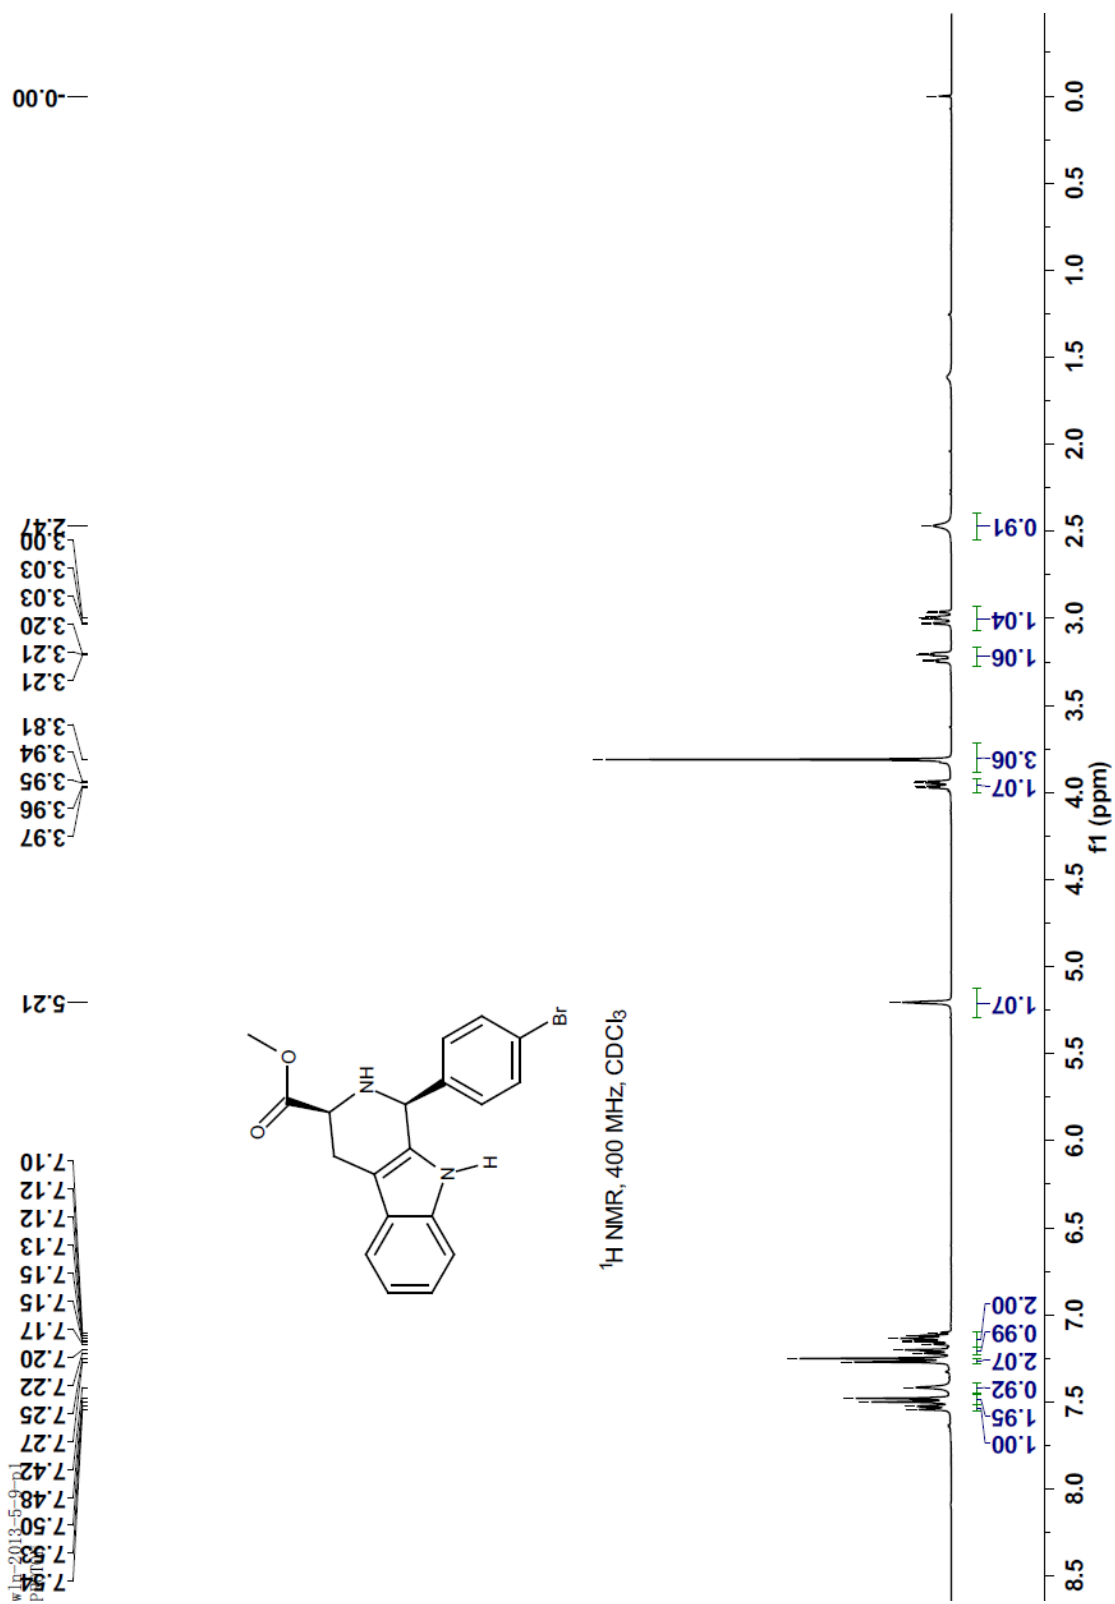

*cis-3s*:  $^{13}\text{C}$  NMR

#1n-2013-5-9-d1  
C13CPD

173.04

139.75  
136.13  
133.99  
132.06  
130.30  
126.96  
122.53  
122.12  
119.73  
118.25  
110.93  
109.08

77.32  
77.00  
76.68

58.07  
56.71  
52.31

25.55

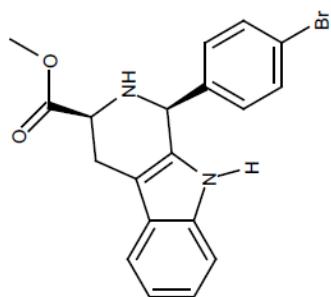

$^{13}\text{C}$  NMR, 100 MHz,  $\text{CDCl}_3$

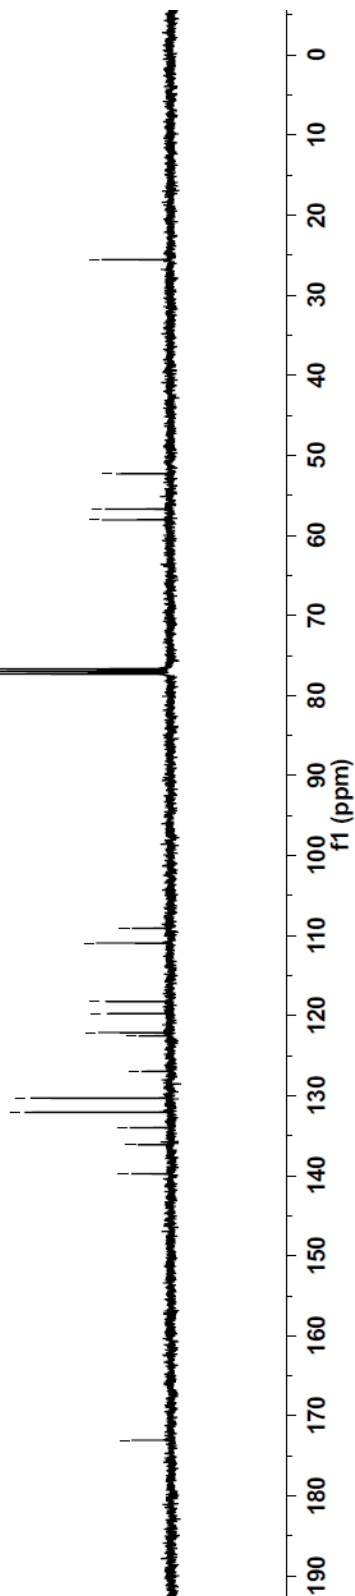

*trans*-3s:  $^1\text{H}$  NMR

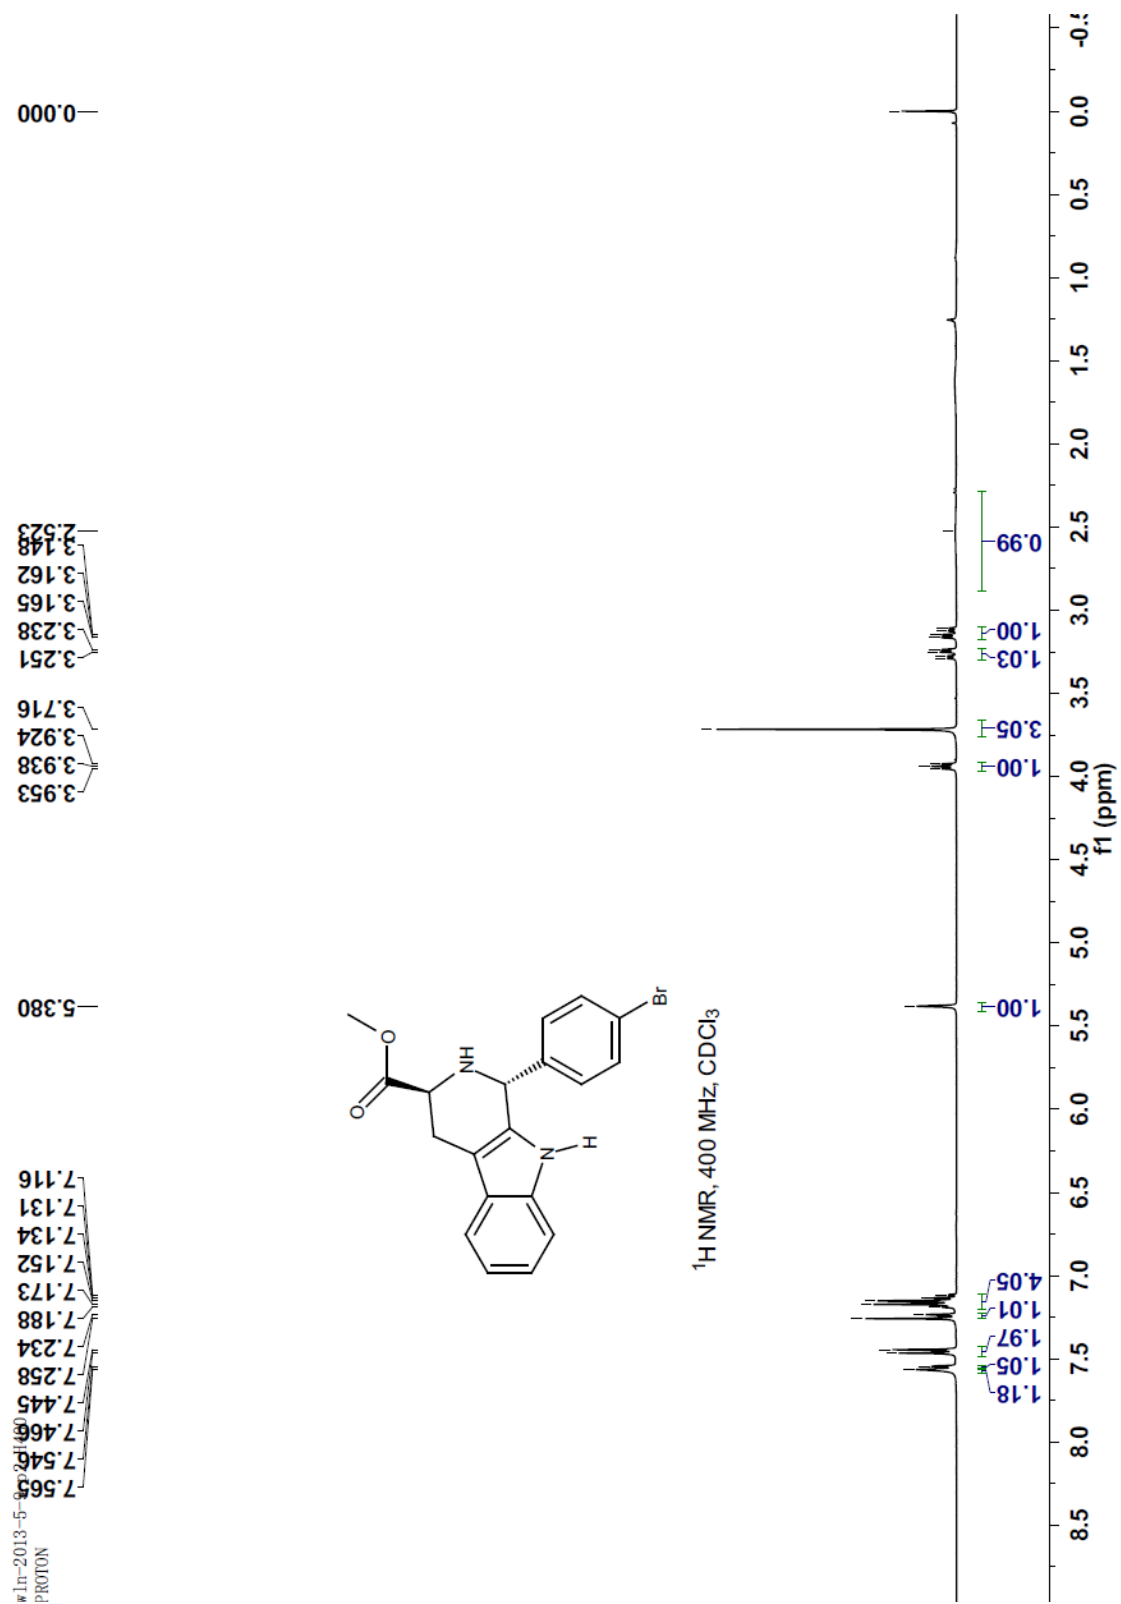

*trans*-3s:  $^{13}\text{C}$  NMR

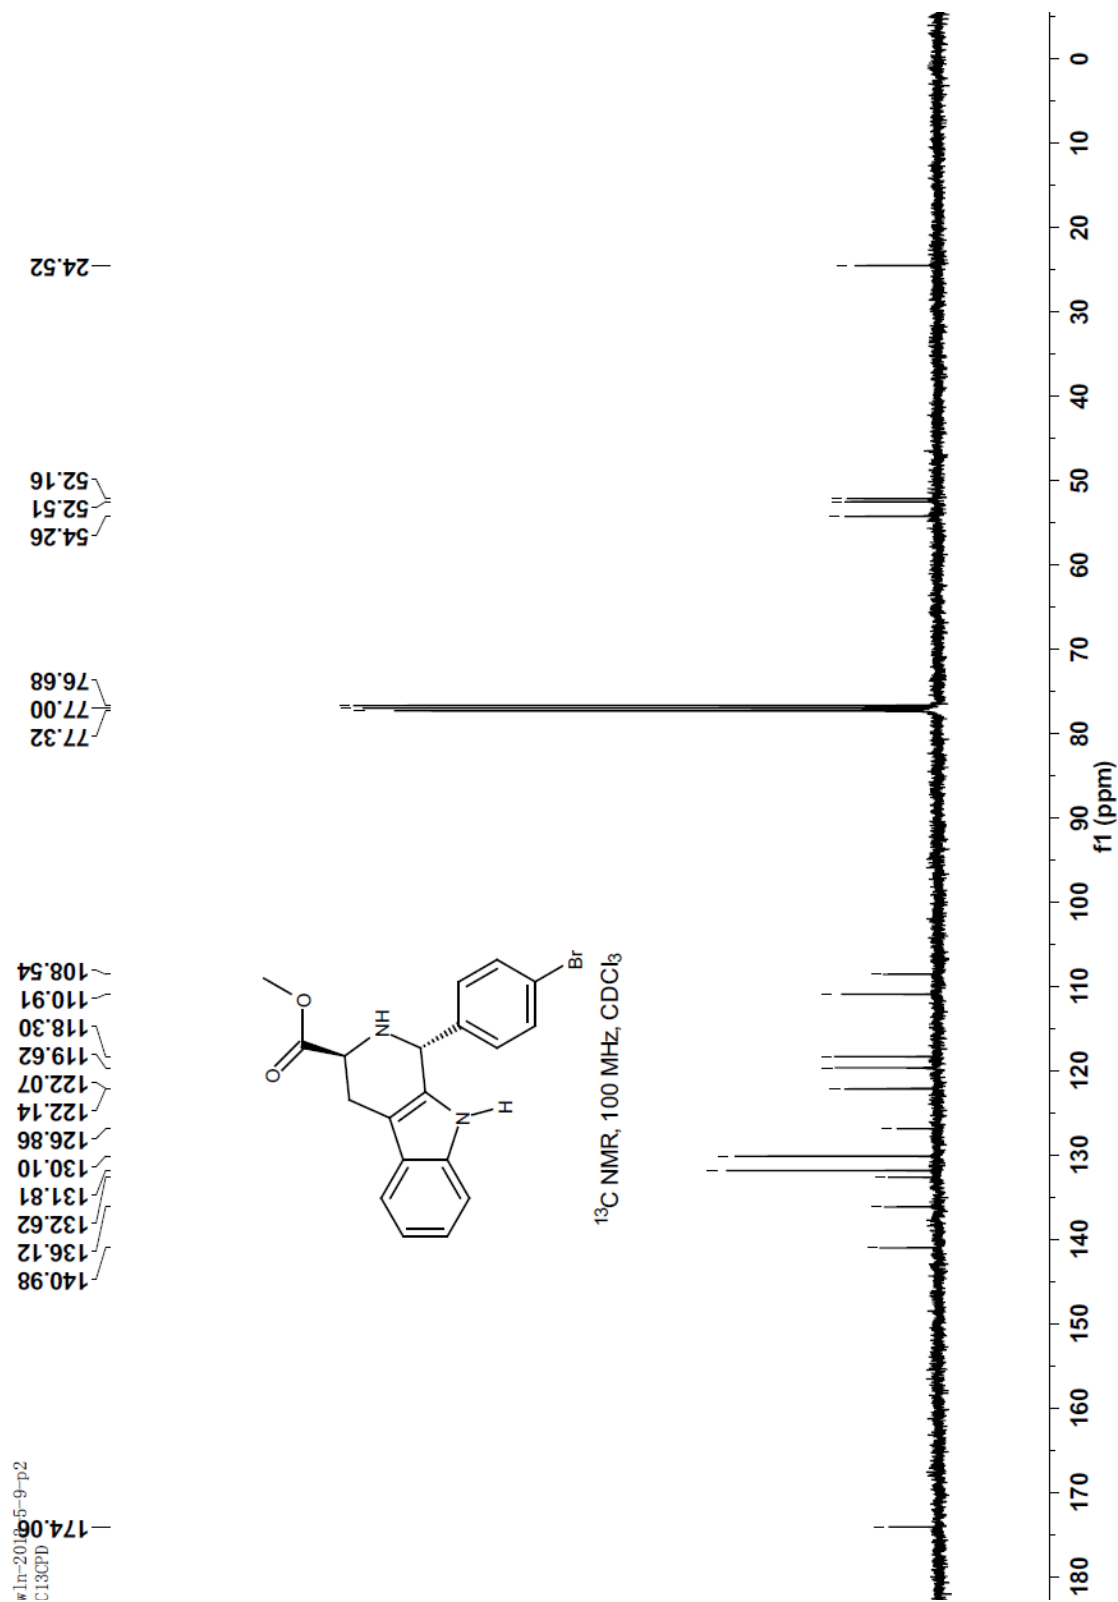

# 1-(2-Fluorophenyl)-3-methoxycarbonyl-1,2,3,4-tetrahydro-β-carboline (3t):

*cis*-3t:  $^1\text{H}$  NMR

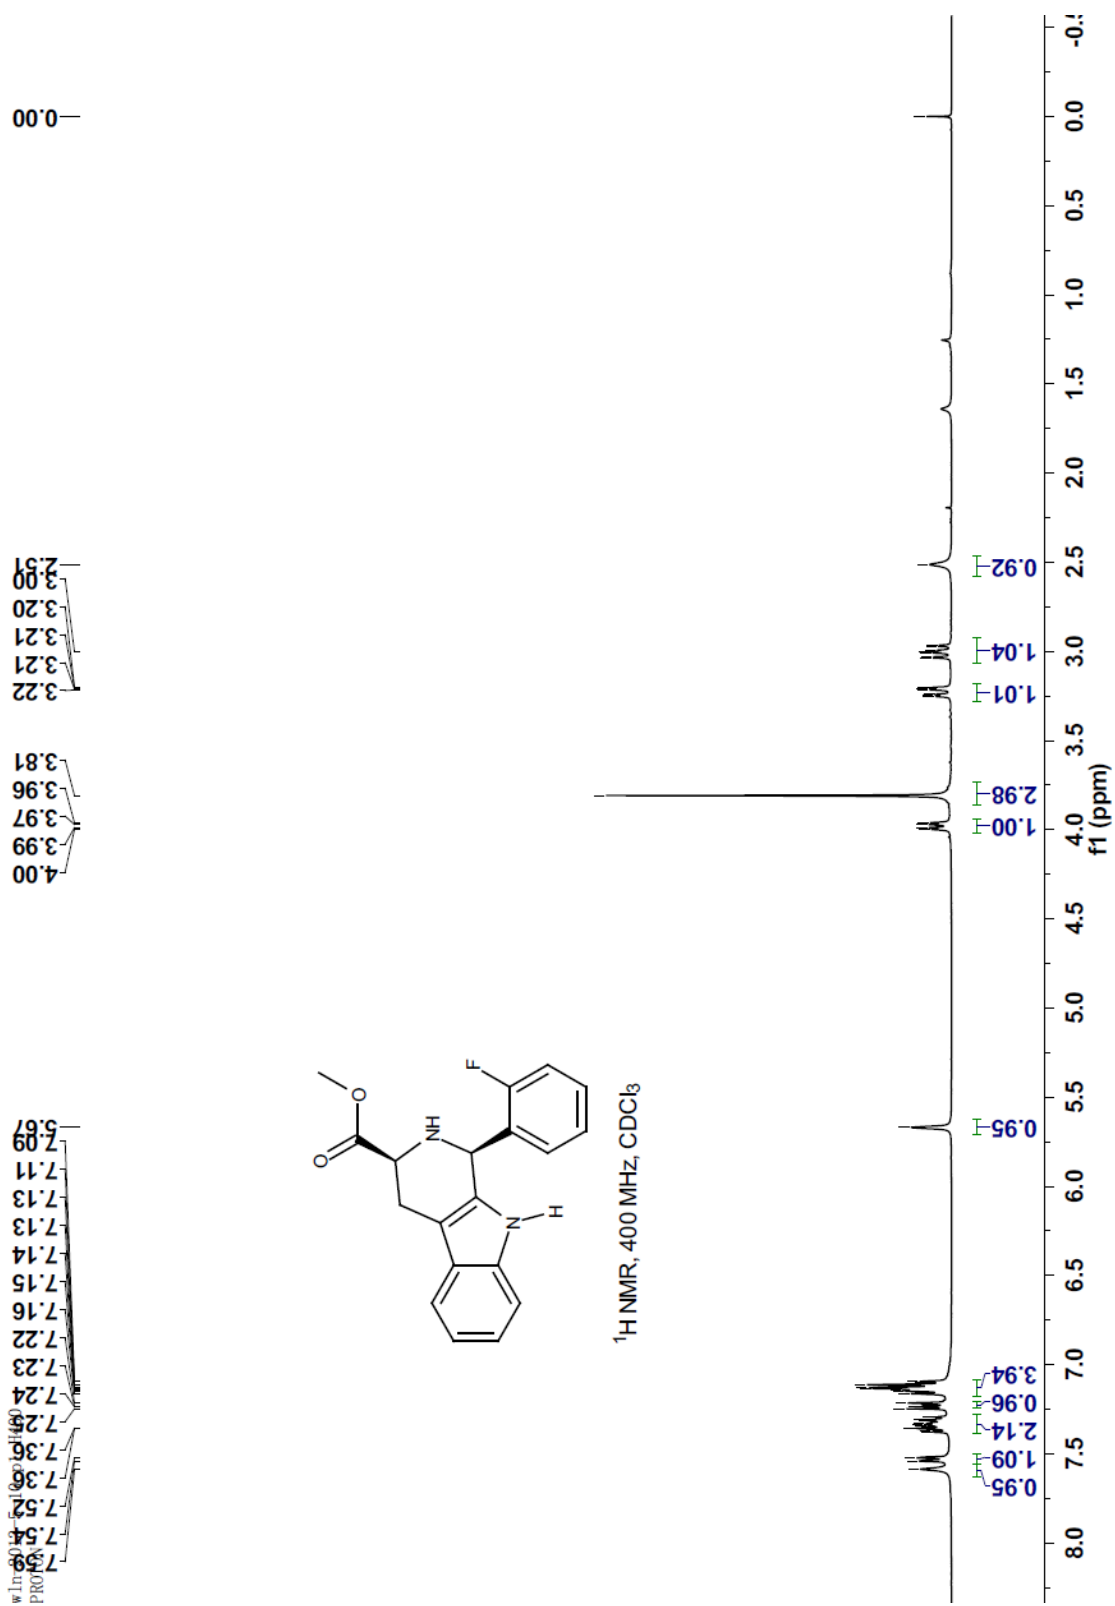

*cis*-3t:  $^{13}\text{C}$  NMR

#In-2013-5-10-pl-H-60  
C13CPD

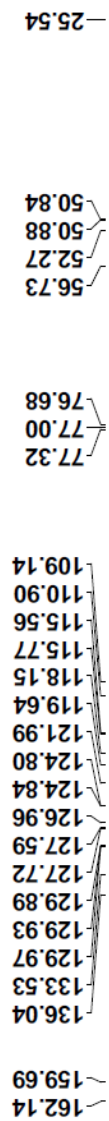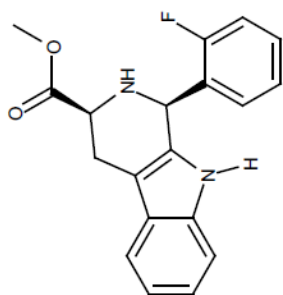

$^{13}\text{C}$  NMR, 100 MHz,  $\text{CDCl}_3$

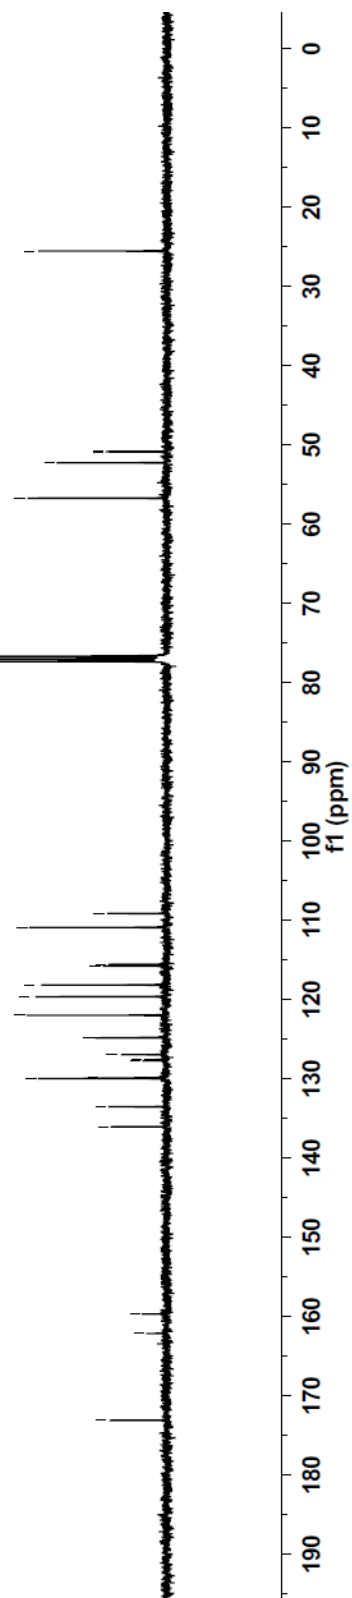



*trans*-3t:  $^1\text{H}$  NMR

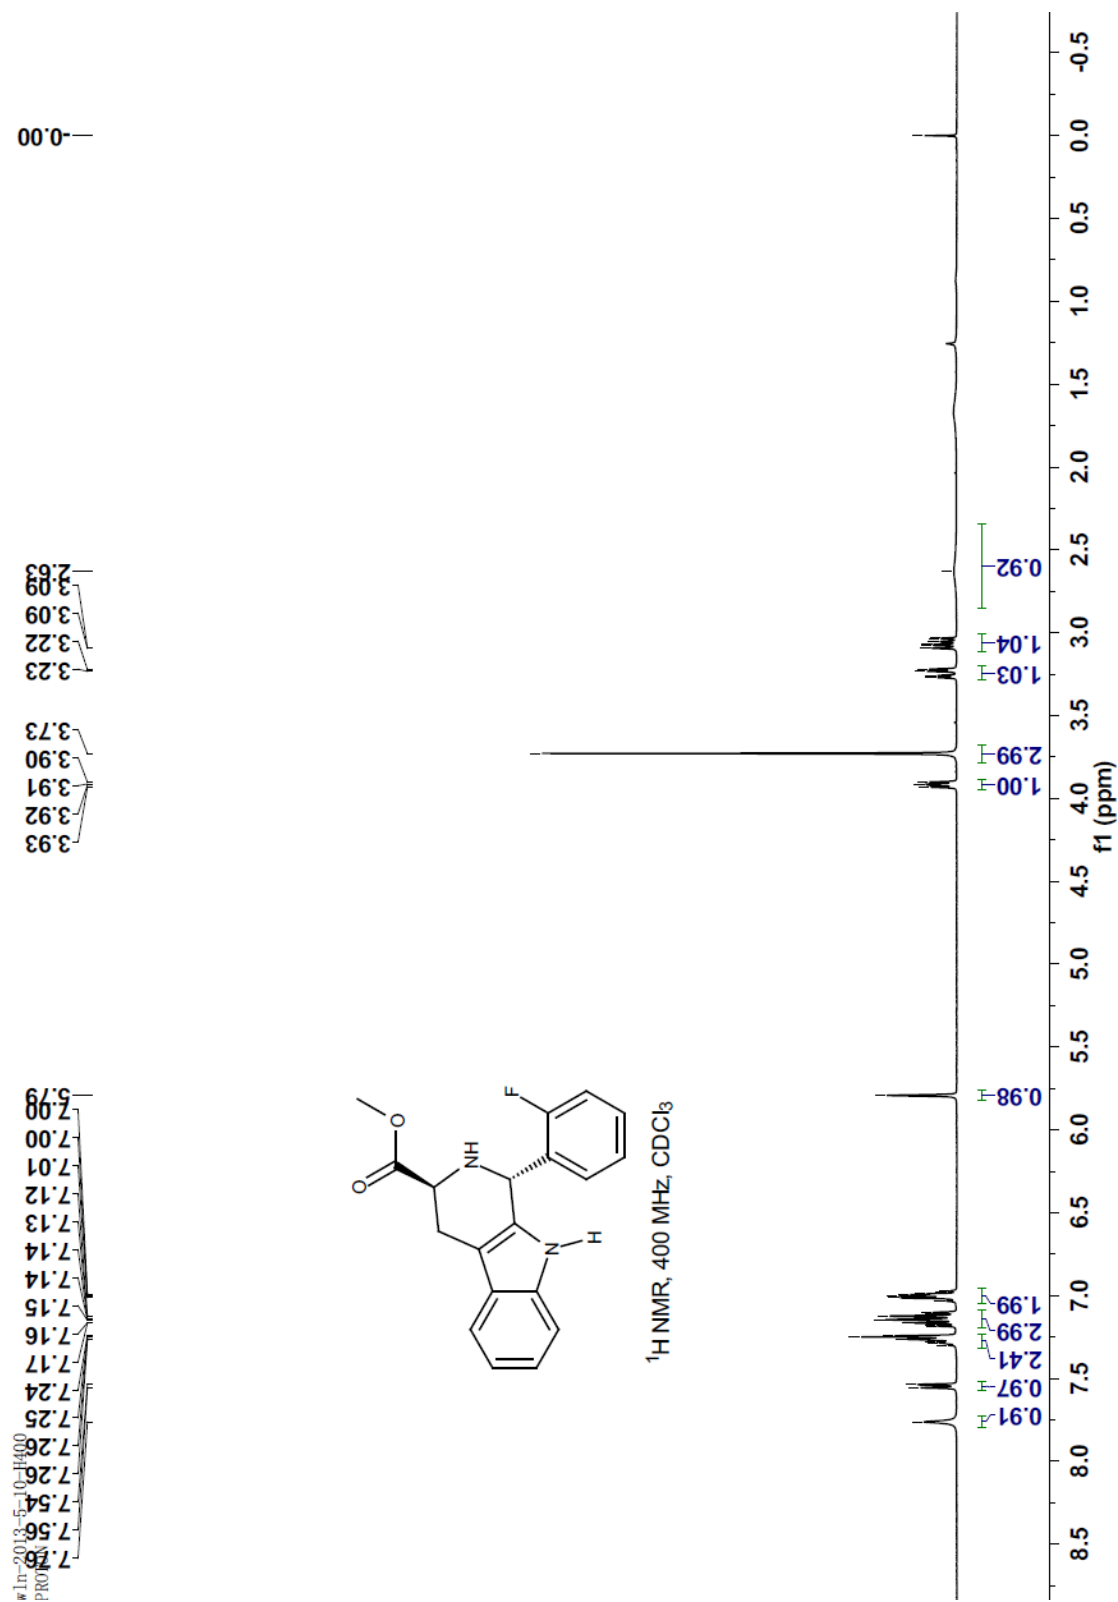

*trans*-3t: <sup>13</sup>C NMR

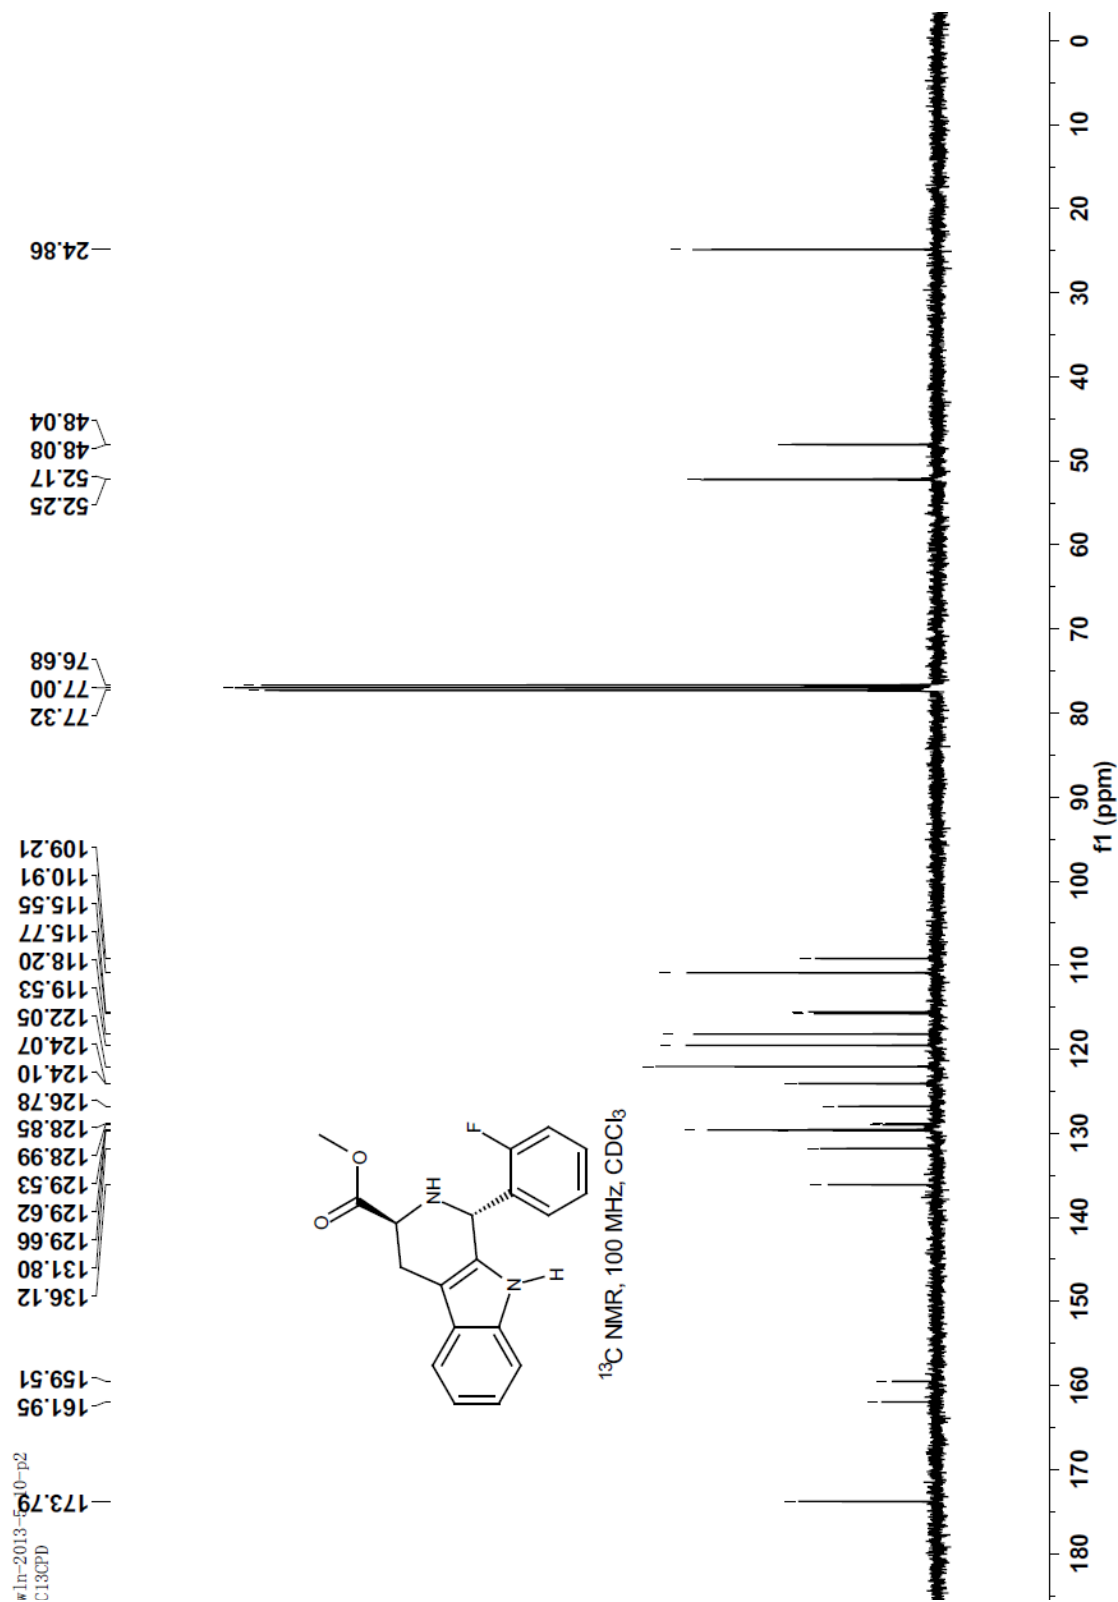

# 1-(2-Hydroxyphenyl)-3-methoxycarbonyl-1,2,3,4-tetrahydro-β-carboline (3u)

*cis*-3u: <sup>1</sup>H NMR

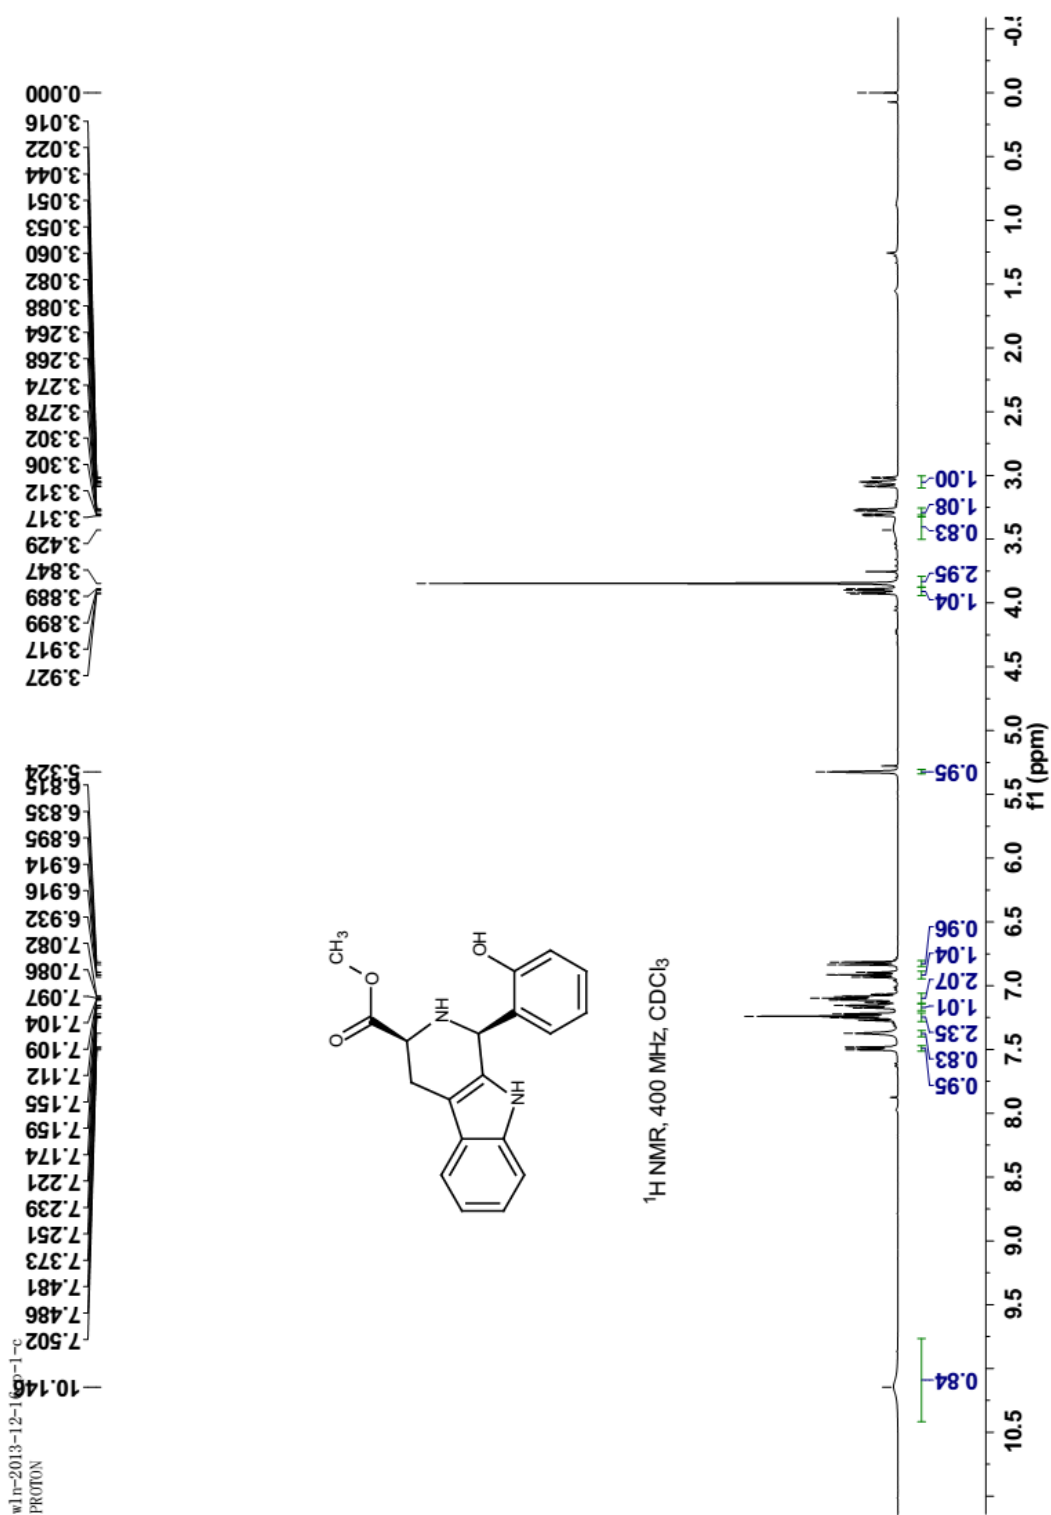

*cis*-3u:  $^{13}\text{C}$  NMR

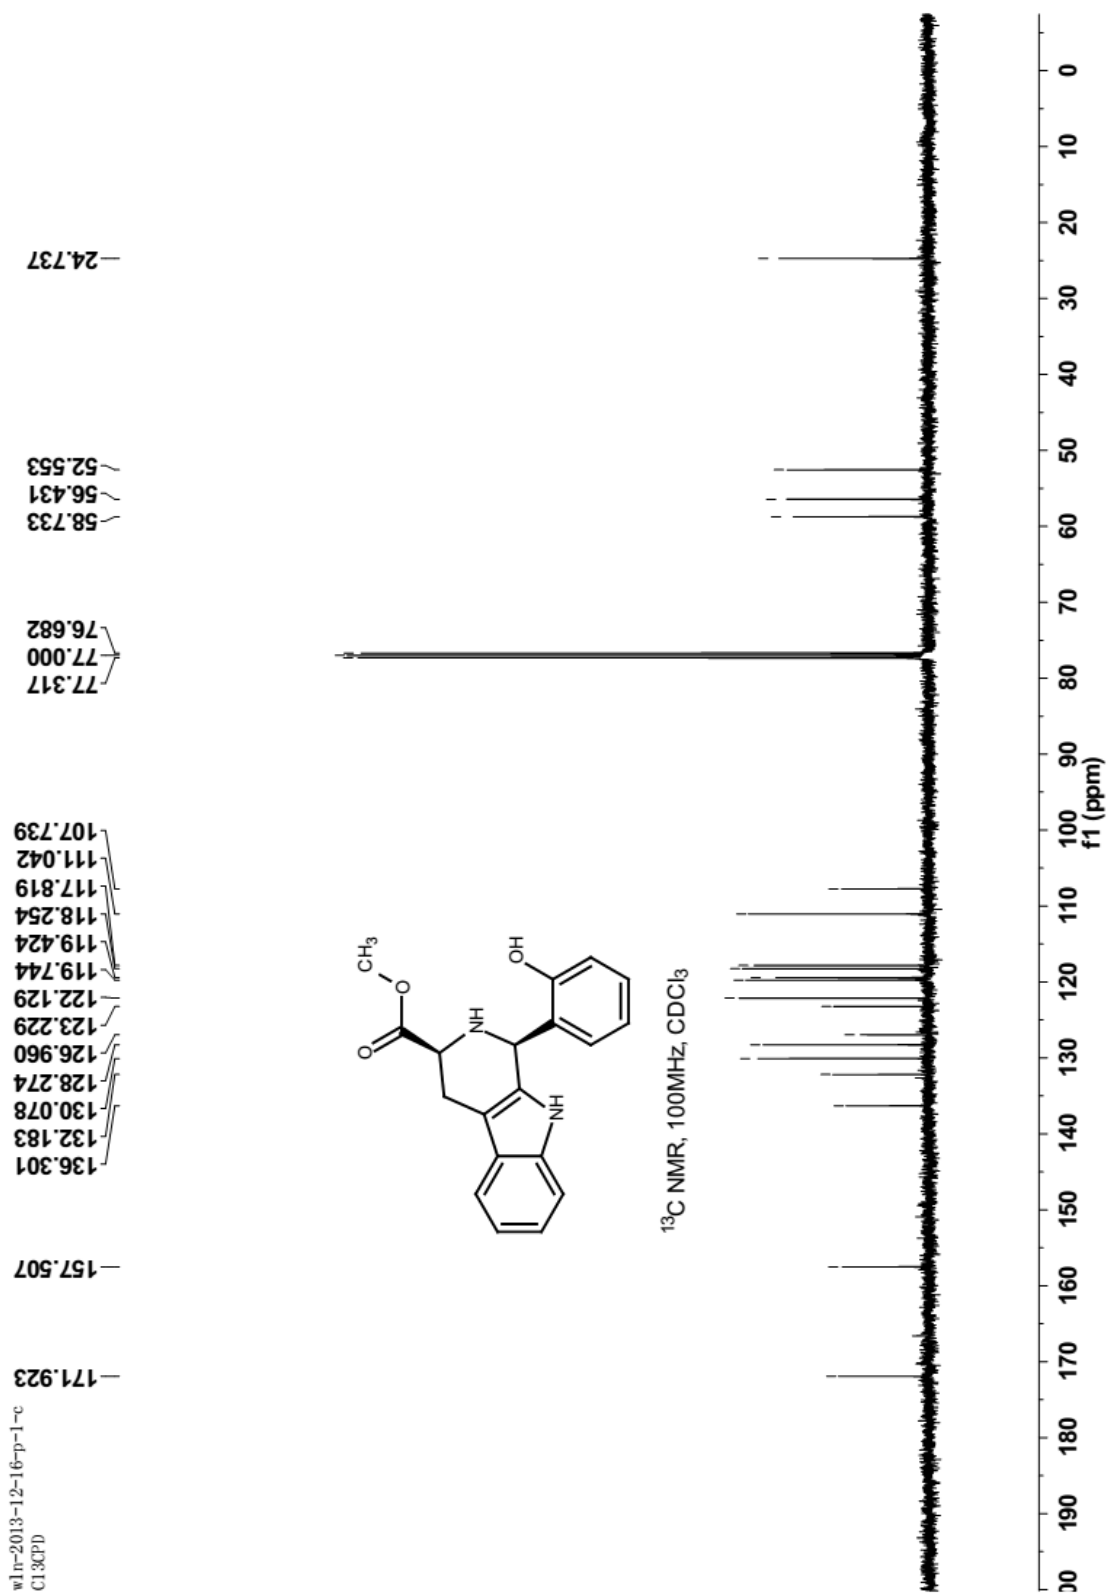

*trans*-3u:  $^1\text{H}$  NMR

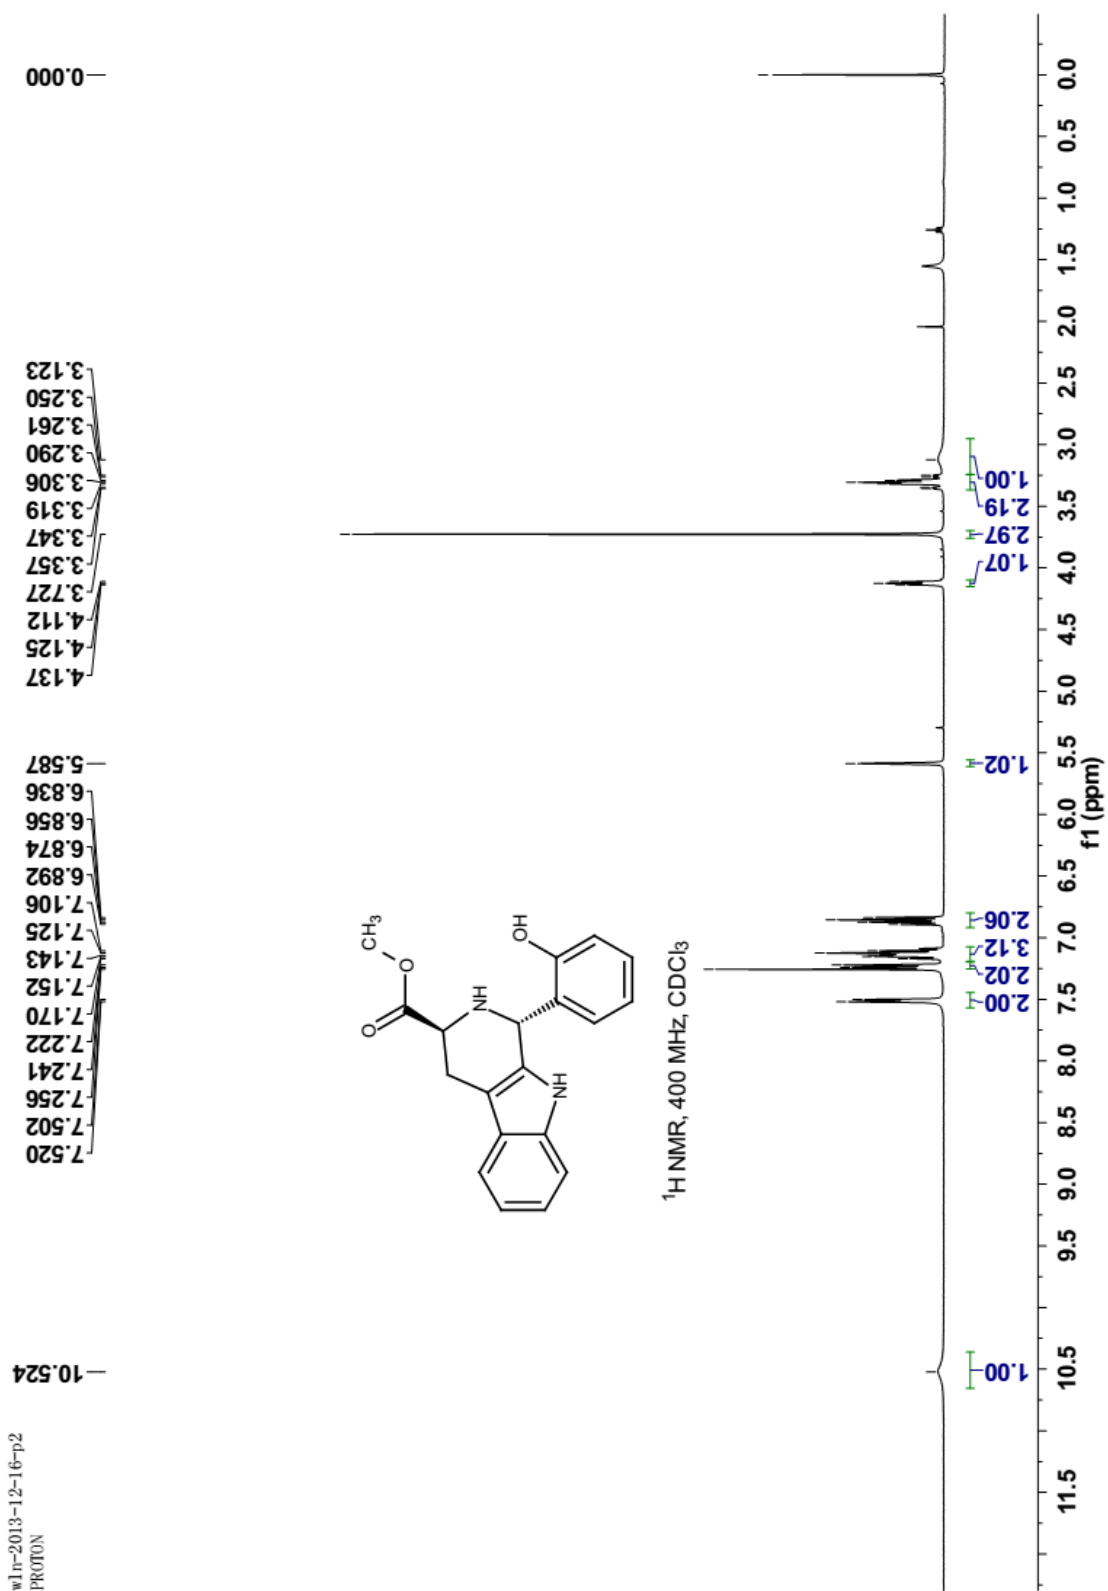

w1r-2013-12-16-p2  
PROTON

*trans*-3u:  $^{13}\text{C}$  NMR

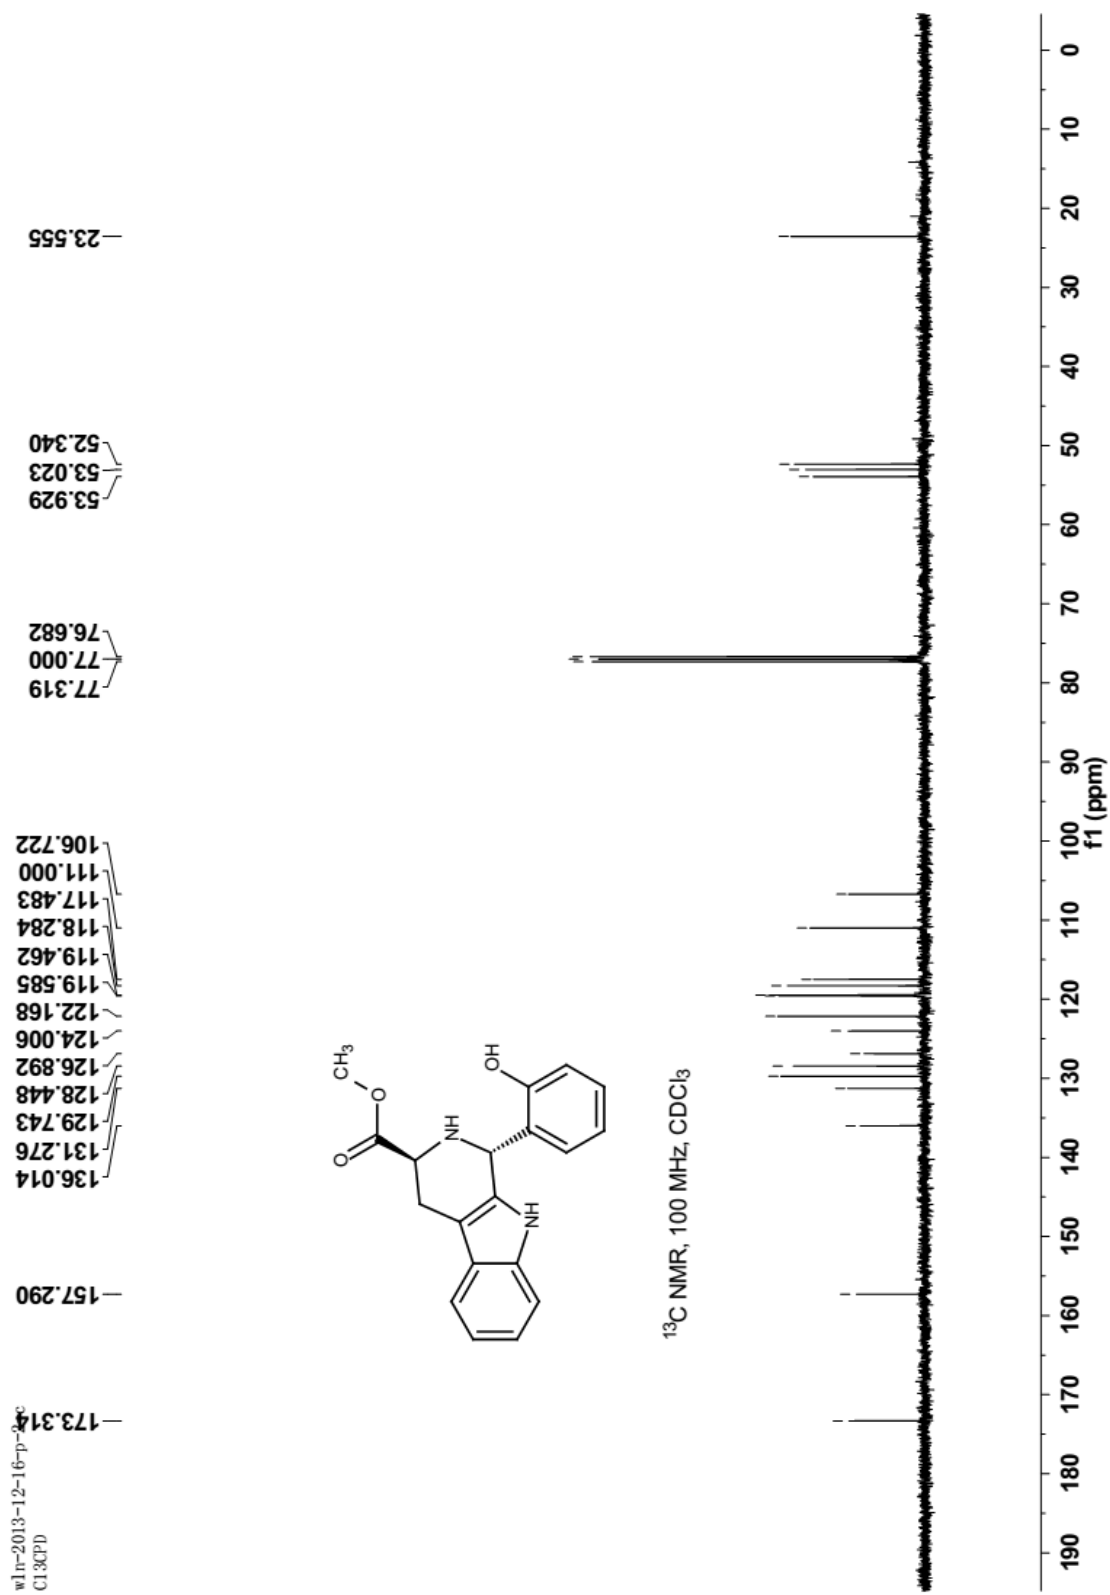

# 1-(4-Methoxyphenyl)-3-methoxycarbonyl-1,2,3,4-tetrahydro-β-carboline (3v):

*cis*-3v: <sup>1</sup>H NMR

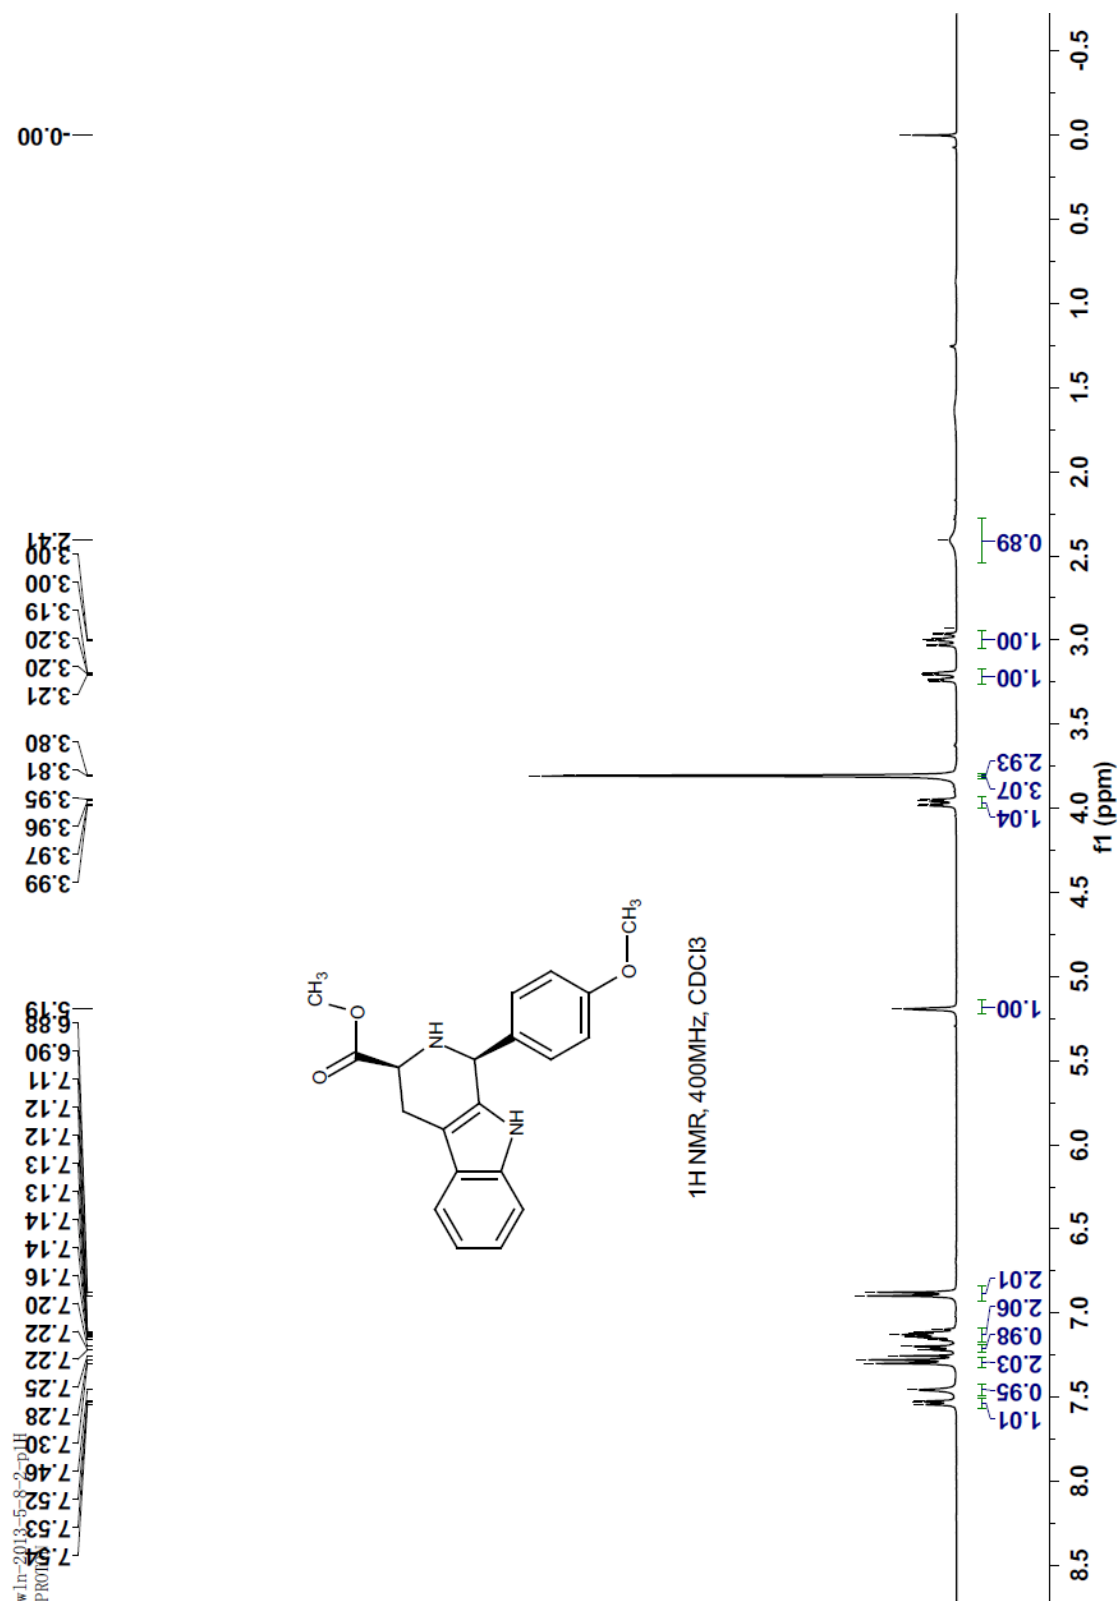

*cis-3v*:  $^{13}\text{C}$  NMR

#11-2013-5-8-2-p1  
C13CPD

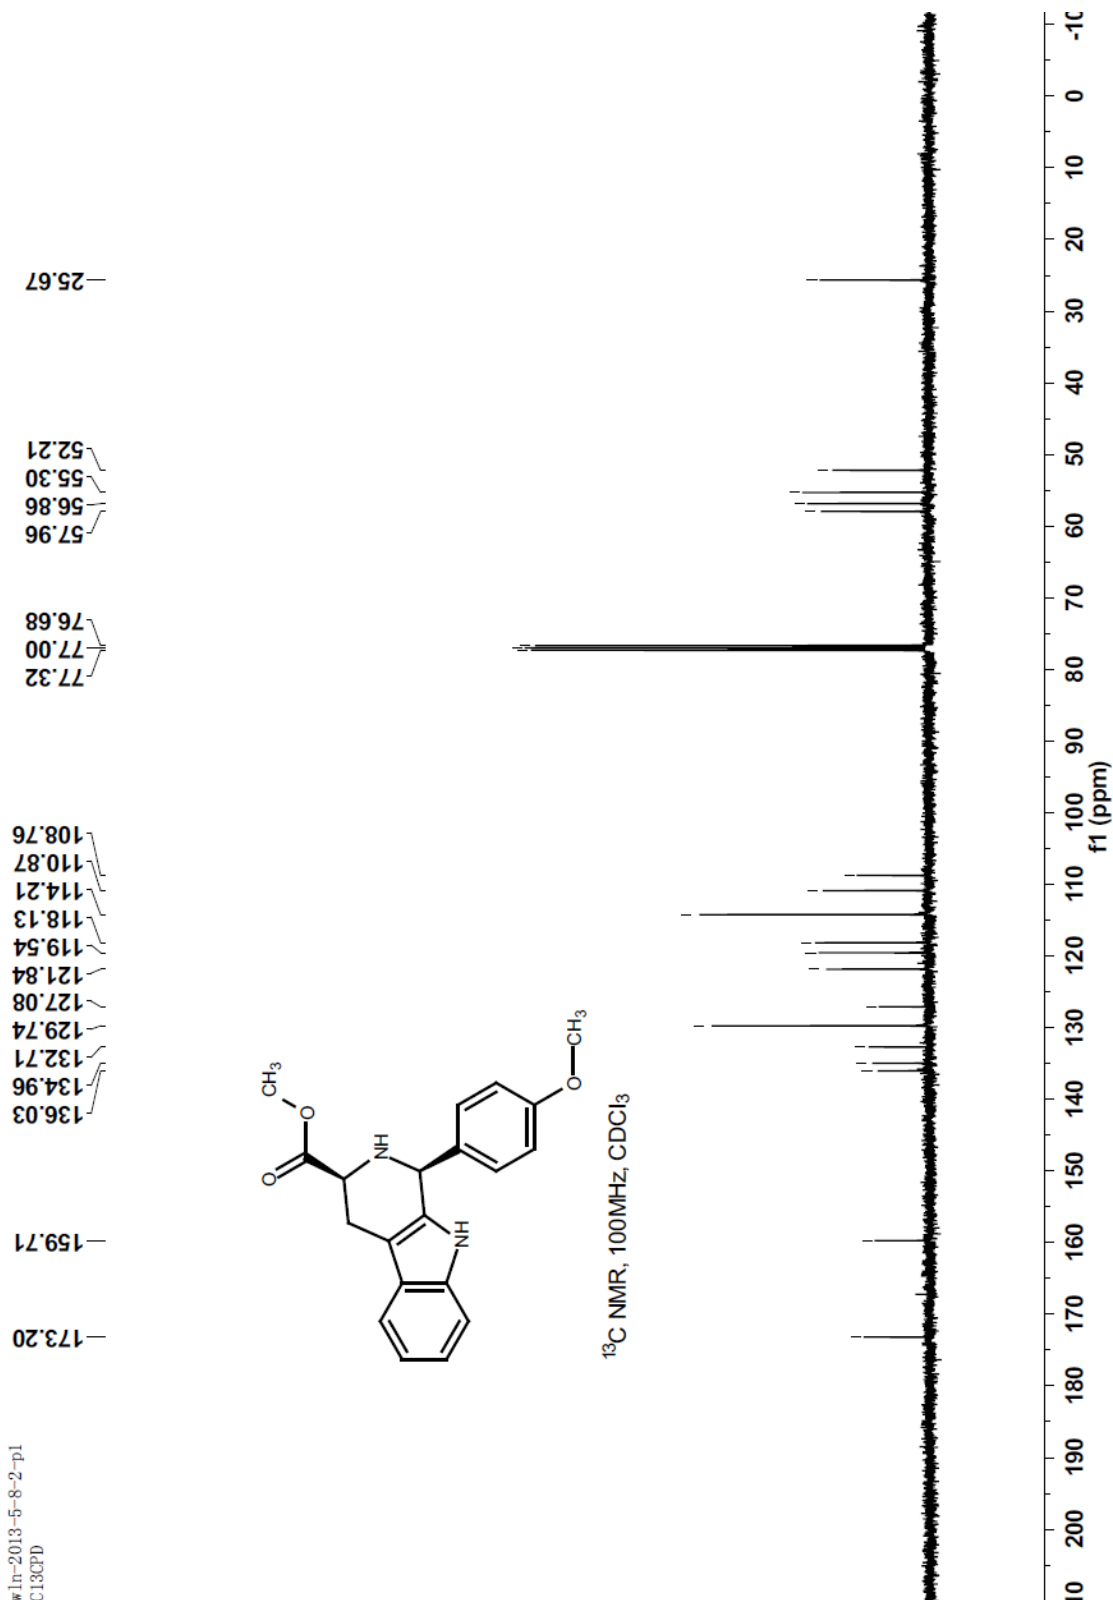



*trans*-3v:  $^1\text{H}$  NMR

#1n-2013-5-8-h-400  
PROTON

7.69  
7.56  
7.54  
7.25  
7.22  
7.20  
7.17  
7.15  
7.14  
7.13  
7.12  
7.10  
6.85  
6.83  
5.34  
3.96  
3.95  
3.93  
3.78  
3.70  
3.28  
3.24  
3.23  
3.14  
3.12  
2.28  
0.07  
0.00

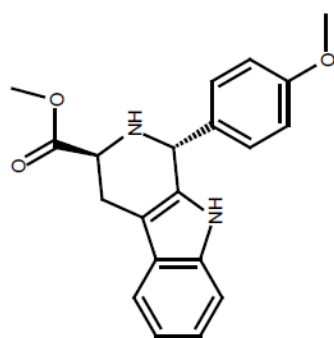

$^1\text{H}$  NMR, 400MHz,  $\text{CDCl}_3$

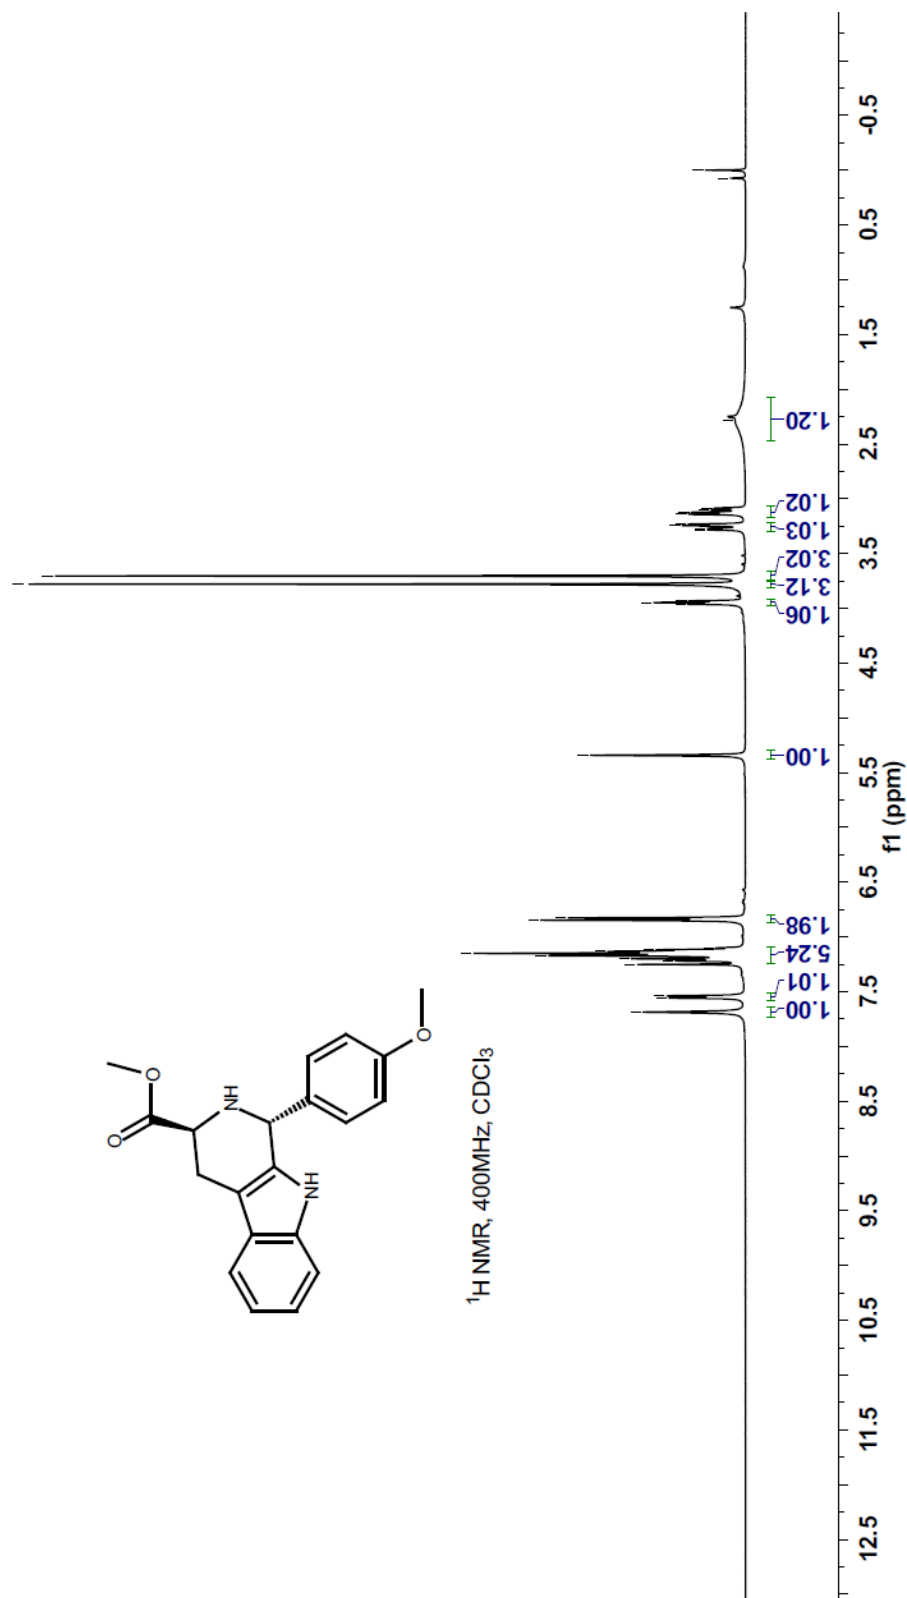

*trans*-3v:  $^{13}\text{C}$  NMR

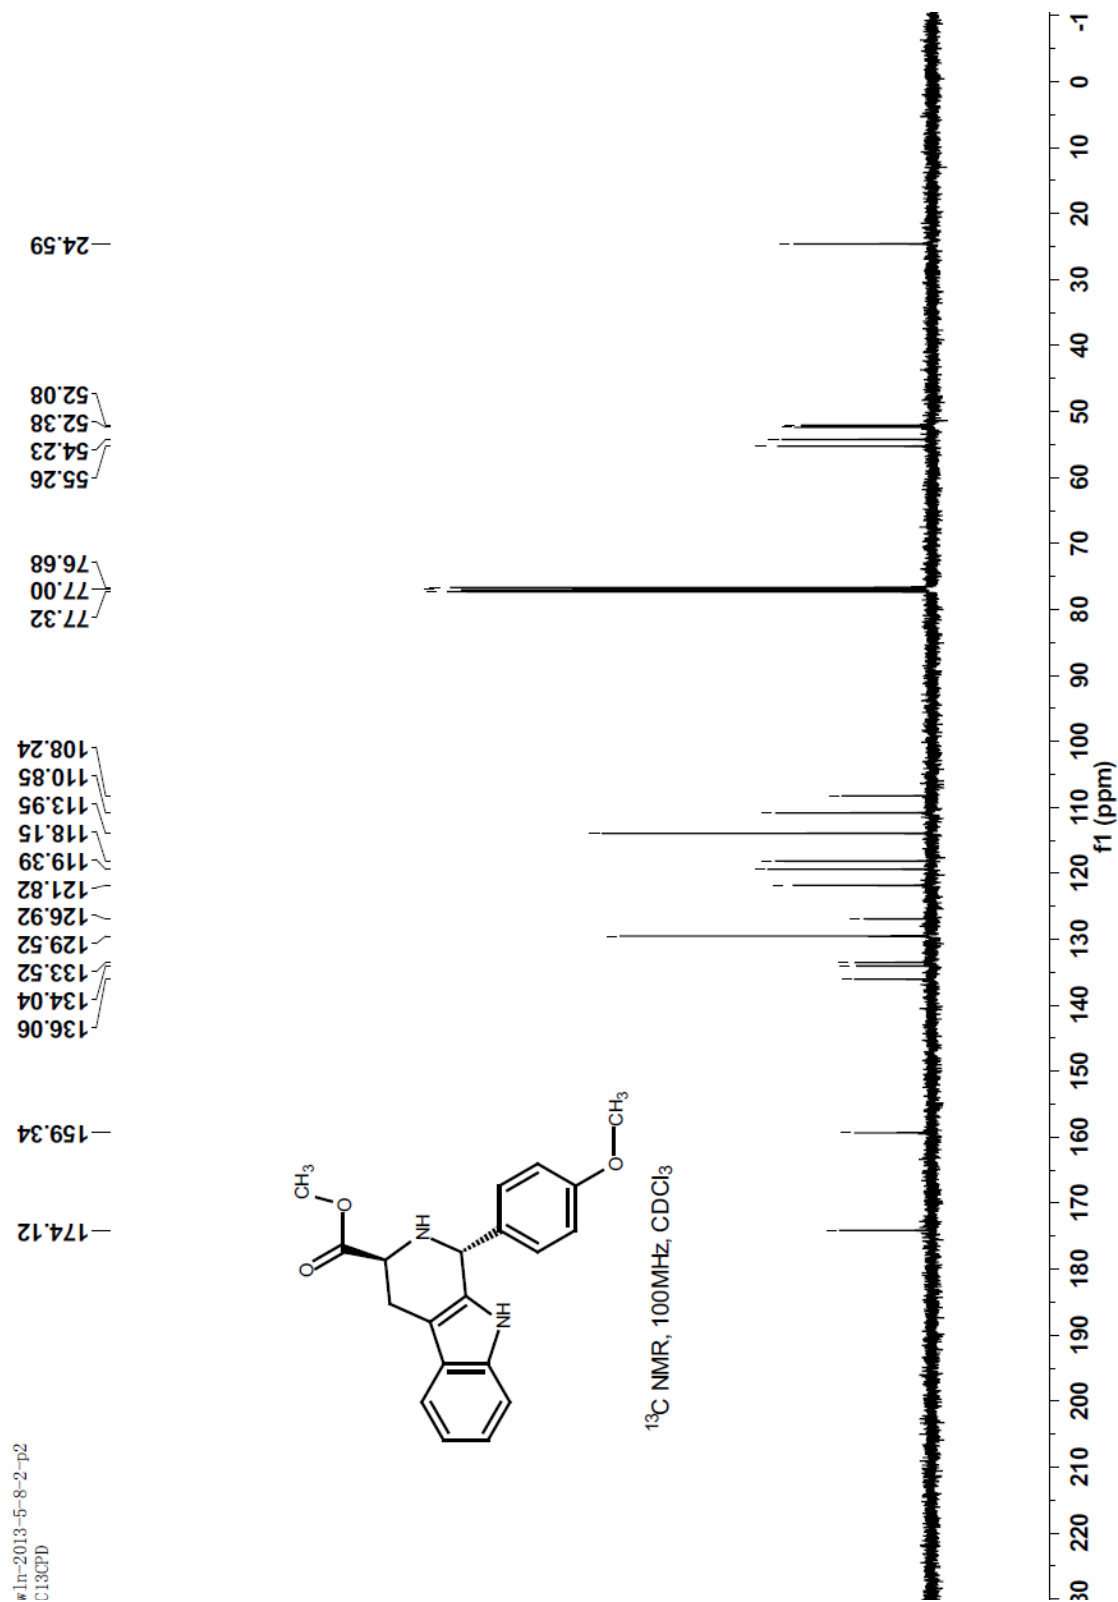

1-Pentyl-3-methoxycarbonyl-1,2,3,4-tetrahydro- $\beta$ -carboline (3w):

*cis-3w*: <sup>1</sup>H NMR

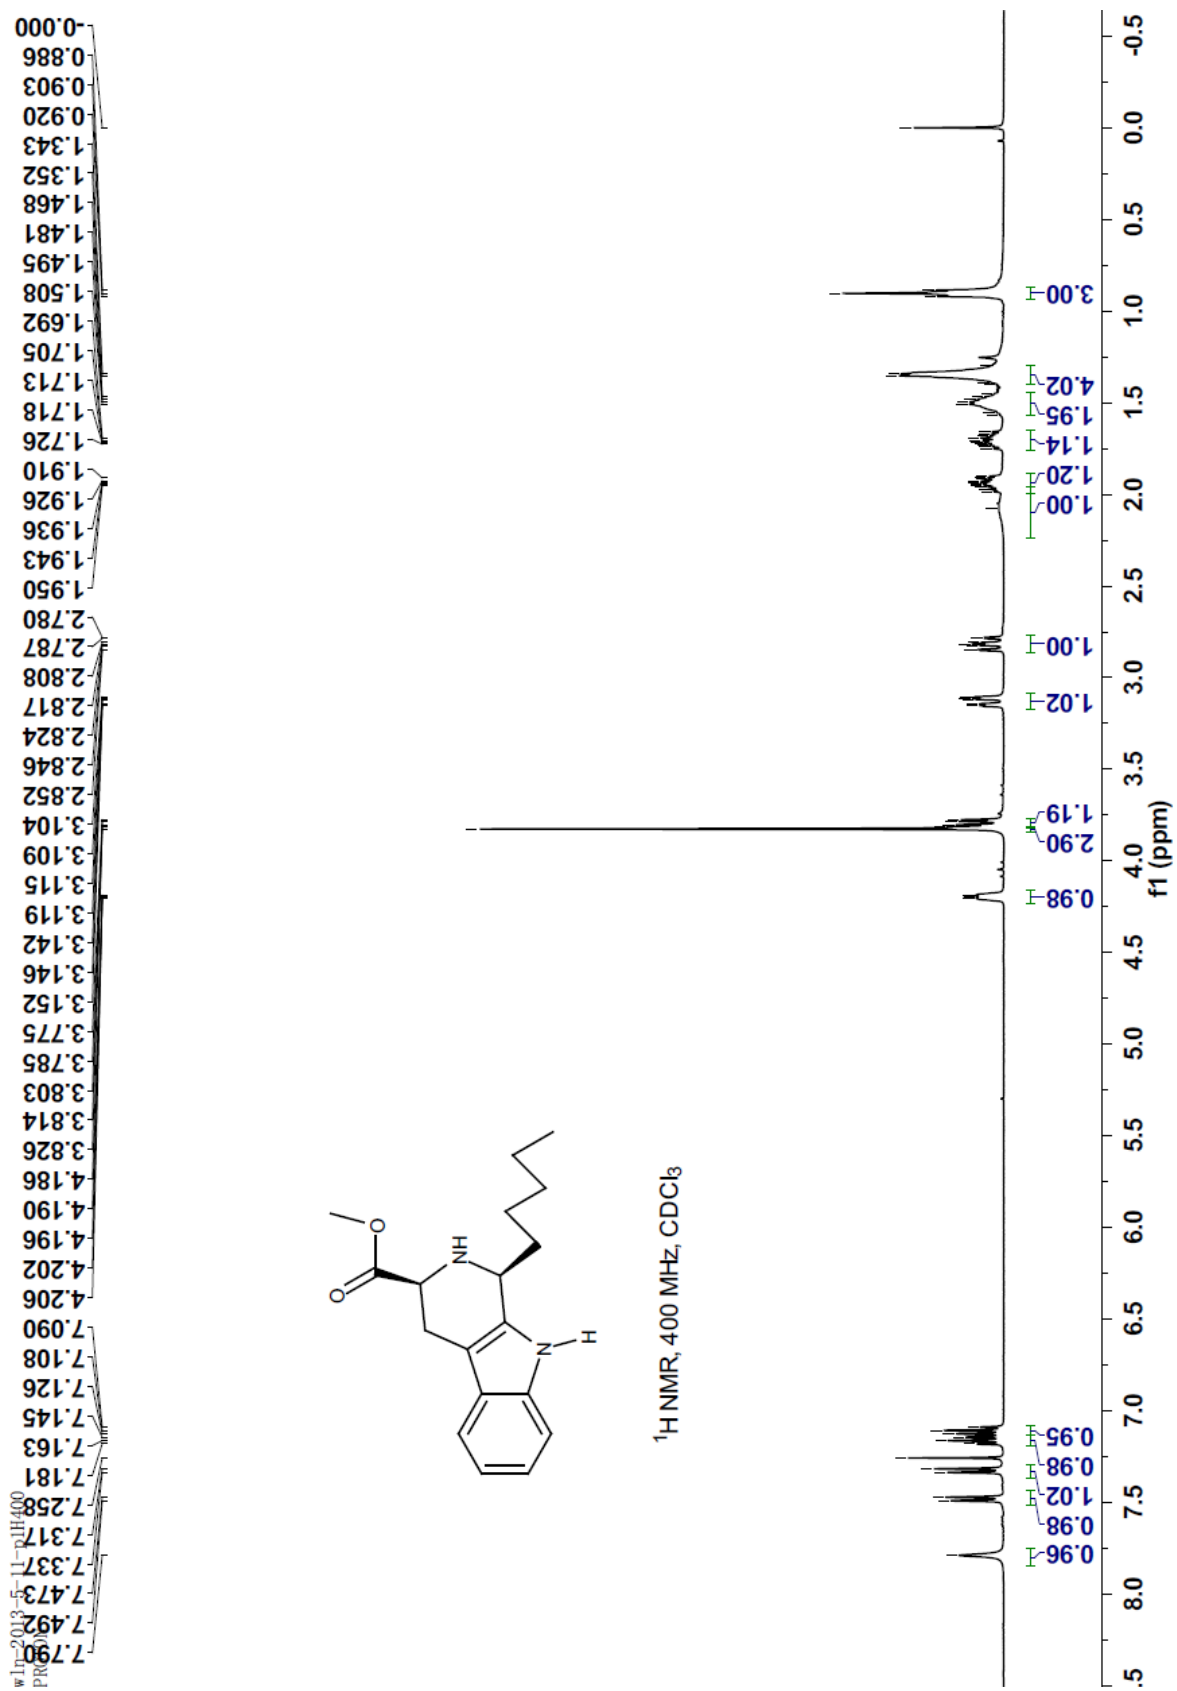

*cis*-3w:  $^{13}\text{C}$  NMR

wIn-2013-5-14.d1  
C13CPD

173.74  
135.87  
135.66  
127.21  
121.69  
119.56  
117.97  
110.77  
108.07

77.32  
77.00  
76.68

56.48  
52.73  
52.18

34.85  
32.08  
25.96  
25.04  
22.55  
14.06

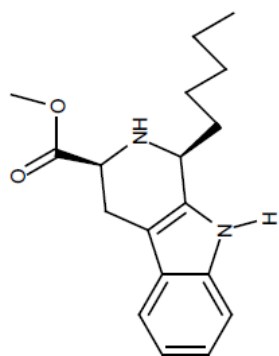

$^{13}\text{C}$  NMR, 100 MHz,  $\text{CDCl}_3$

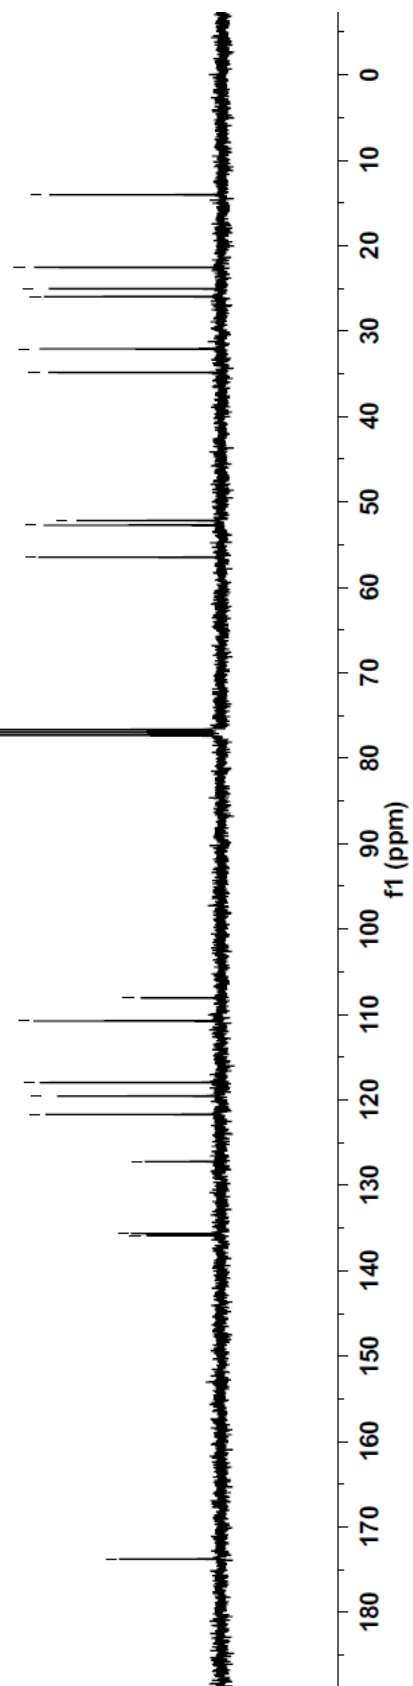

*trans*-3w:  $^1\text{H}$  NMR

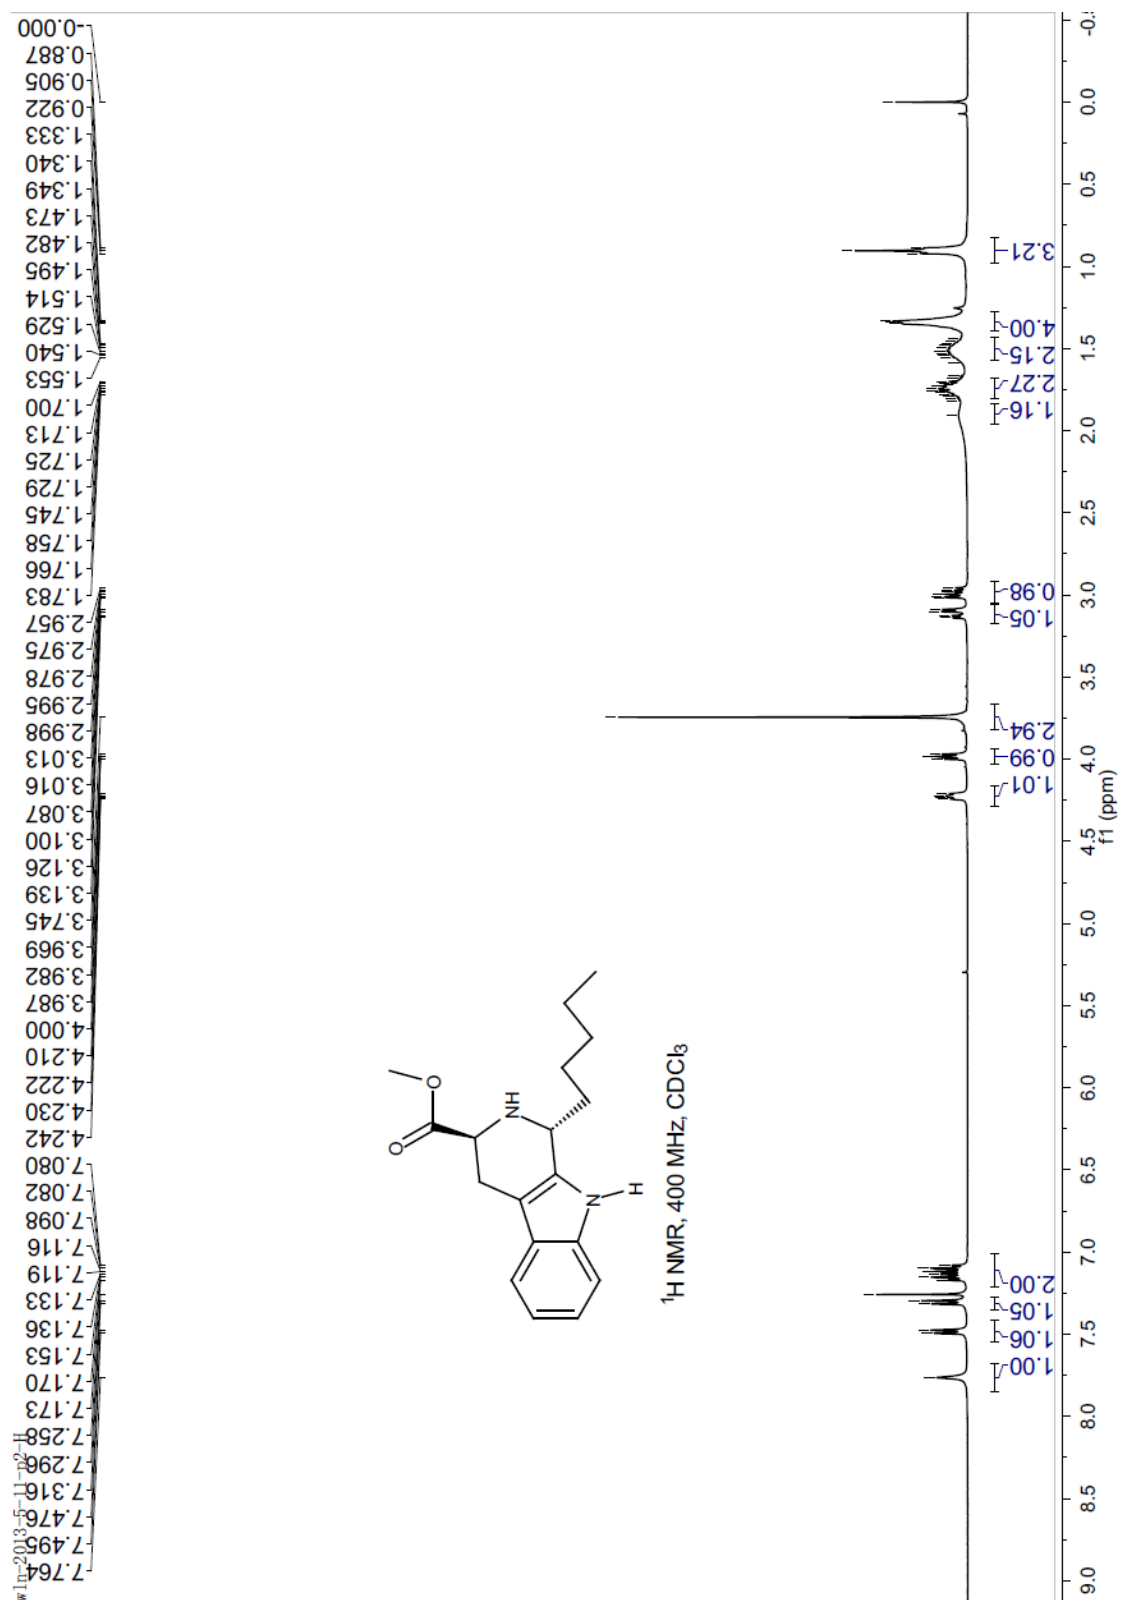

*trans*-3w:  $^{13}\text{C}$  NMR

#11n-2013-5-11-12  
C13CPD

- 174.30
- 135.78
- 135.66
- 127.06
- 121.61
- 119.39
- 117.99
- 110.68
- 106.88
- 77.32
- 77.00
- 76.68
- 52.57
- 52.10
- 50.30
- 35.65
- 31.90
- 25.90
- 24.99
- 22.59
- 14.07

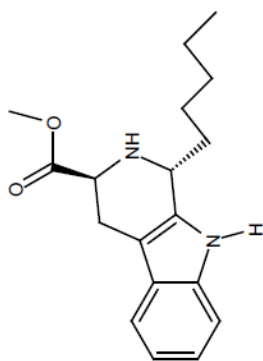

$^{13}\text{C}$  NMR, 100 MHz,  $\text{CDCl}_3$

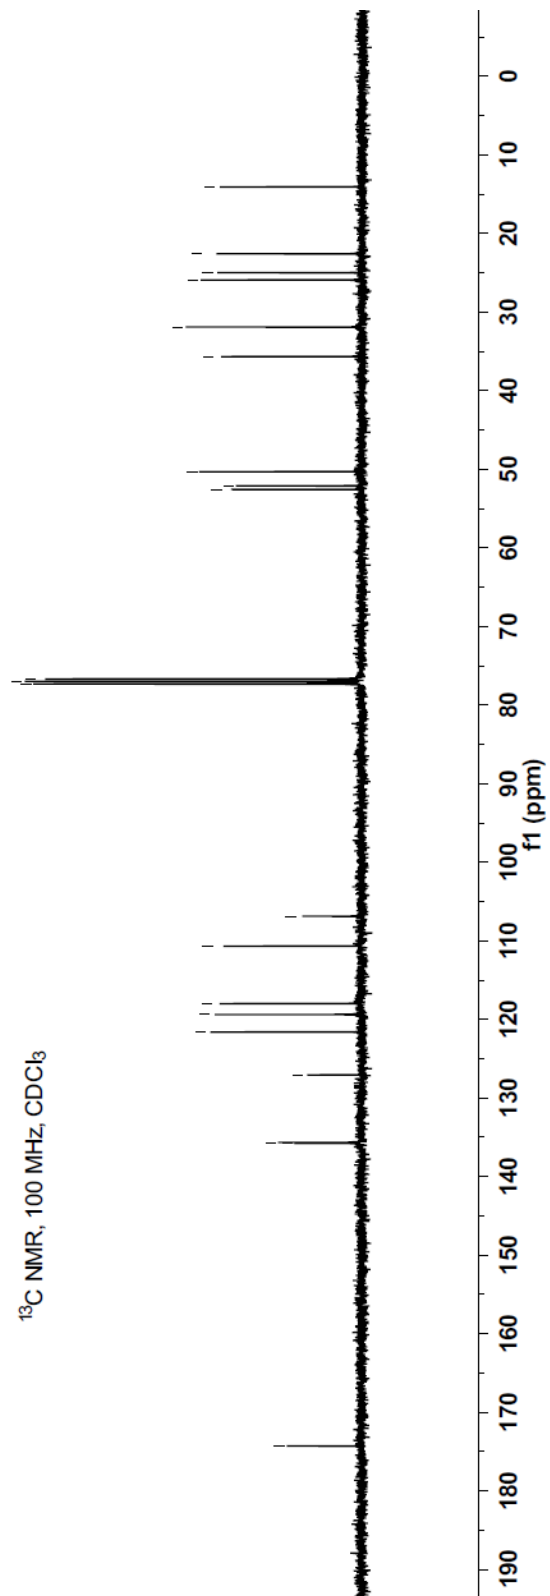

# 1-Isopropyl-3-methoxycarbonyl-1,2,3,4-tetrahydro-β-carboline (3x):

*cis*-3x:  $^1\text{H}$  NMR

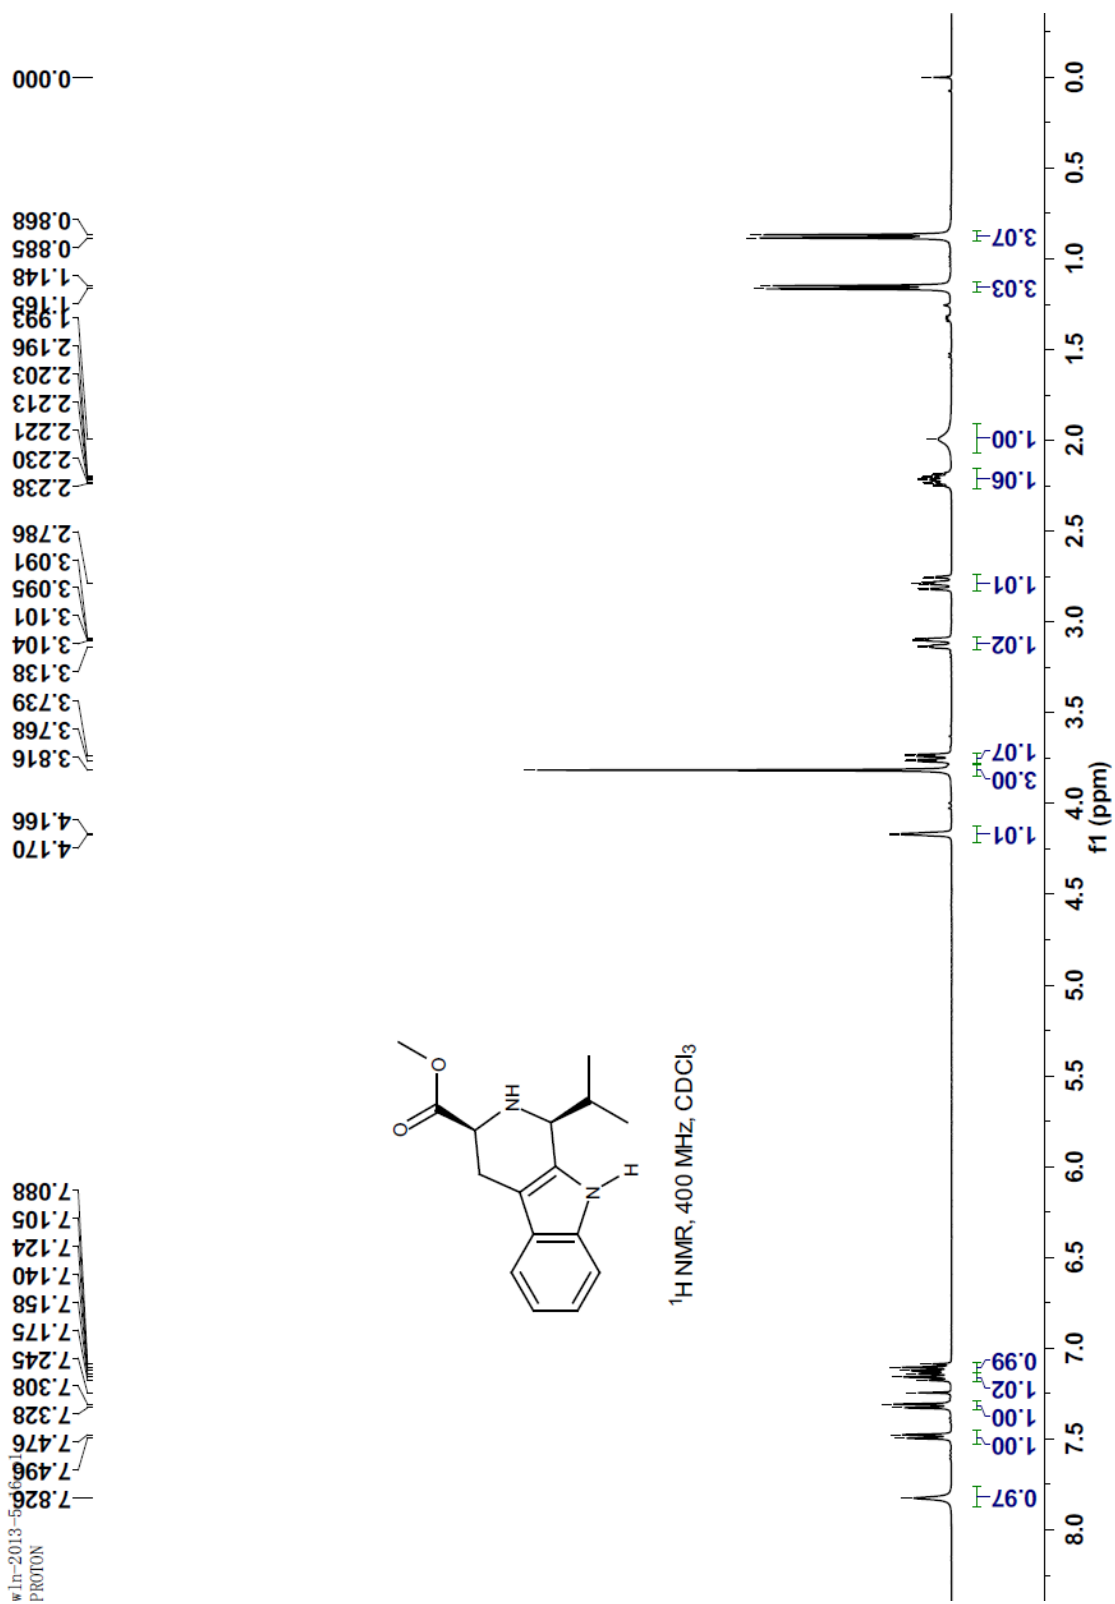

*cis-3x*:  $^{13}\text{C}$  NMR

#In-2013-5-16-pl  
C13CPD

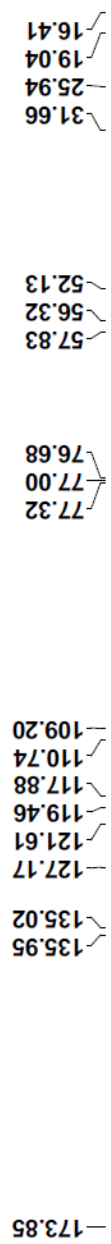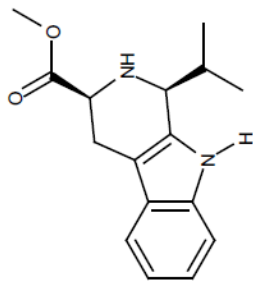

$^{13}\text{C}$  NMR, 100 MHz,  $\text{CDCl}_3$

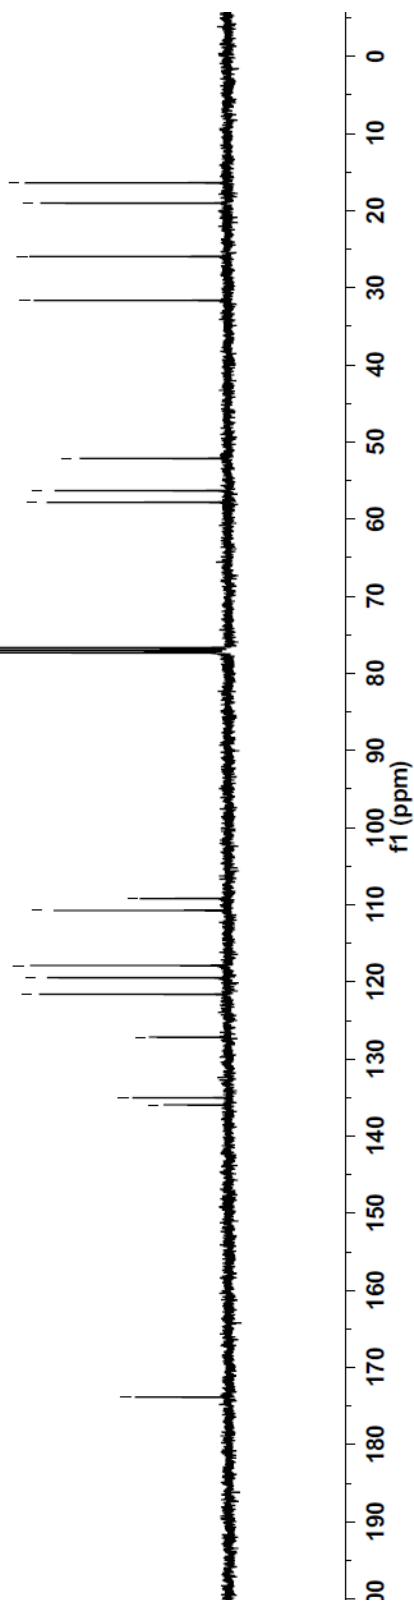



*trans*-3x:  $^1\text{H}$  NMR

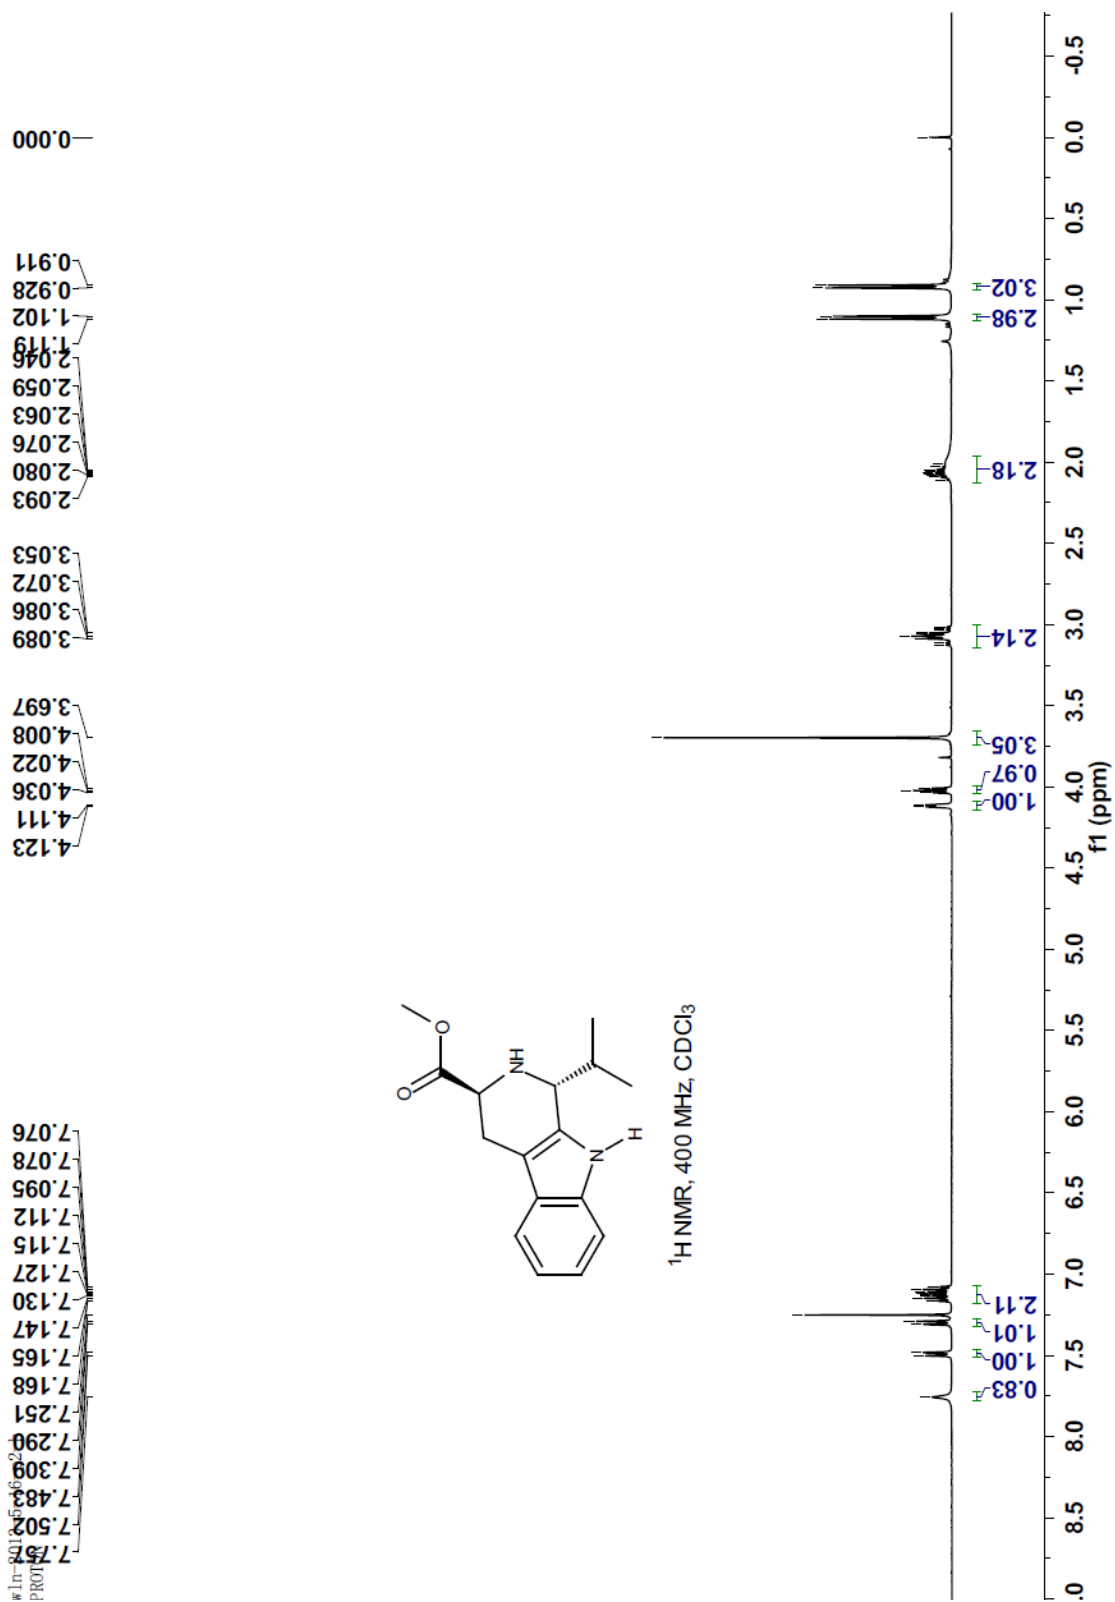

*trans*-3x:  $^{13}\text{C}$  NMR

#111-2013-5-16-12  
C13CPD

174.63

135.81

134.58

127.06

121.53

119.29

117.96

110.61

107.86

77.32  
77.00  
76.68

55.26  
53.52  
52.02

32.90

24.64

19.54

17.75

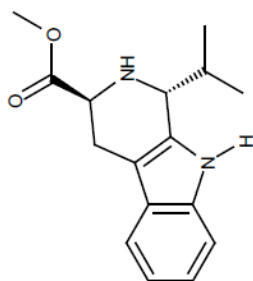

$^{13}\text{C}$  NMR, 100 MHz,  $\text{CDCl}_3$

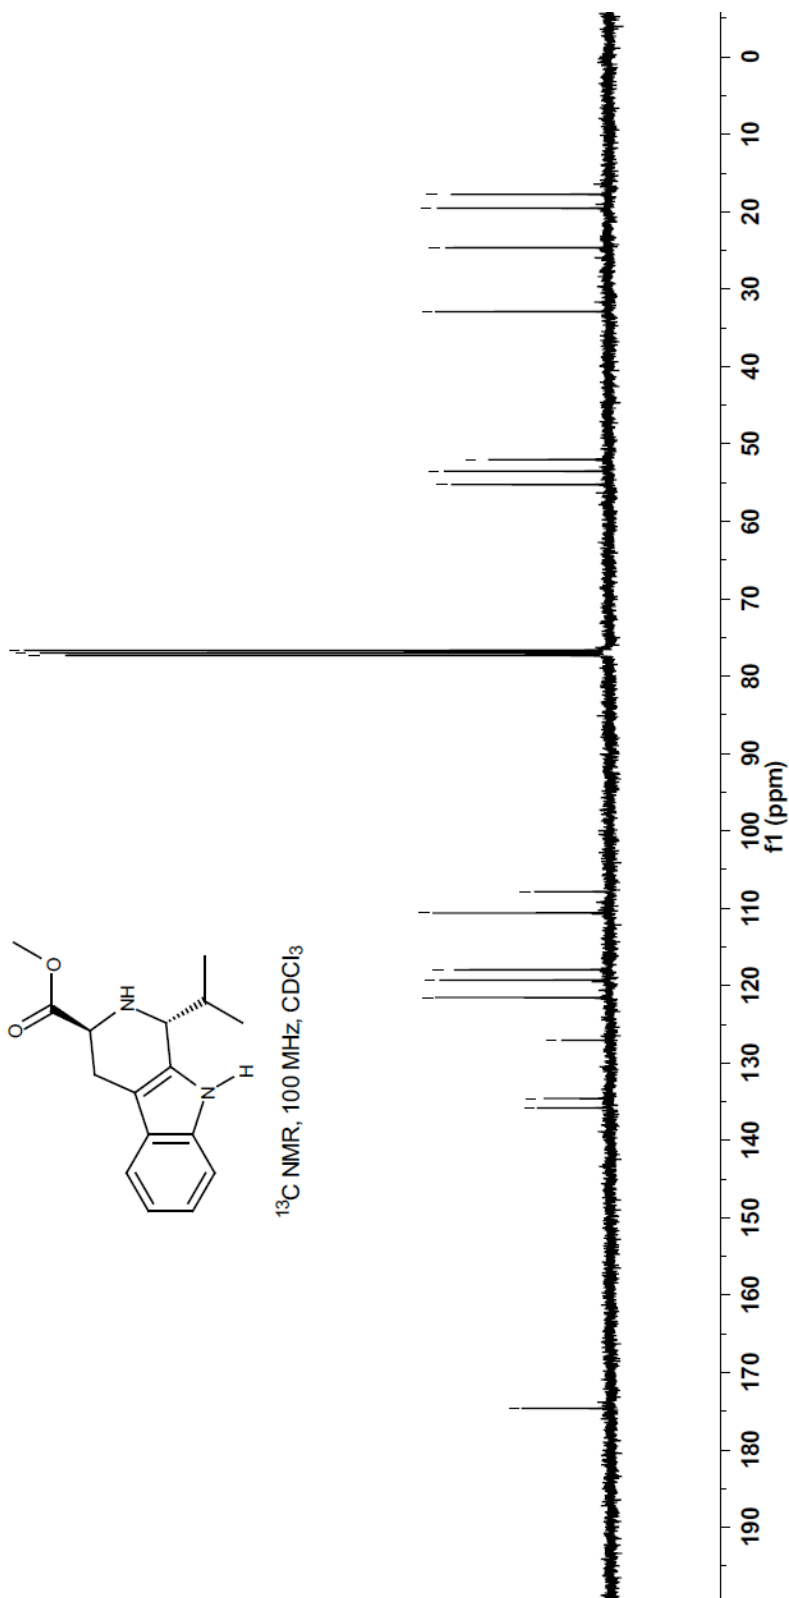

# 1-(2-Fluorophenyl)-1,2,3,4-tetrahydro-β-carboline (3d): HRMS

Z-6 / 12 | 2

Sample Name: IC/ms  
 Inj Vol: 1  
 Data Filename: WLN-266.d  
 Position: InjPosition  
 ACQ Method: chen-ms.m  
 Instrument Name: Instrument 1  
 Sample Type: Sample  
 Comment:  
 User Name:  
 IRM Calibration Status:  
 Acquired Time: 7/9/2013 9:36:29 AM  
 Some Ions Missed

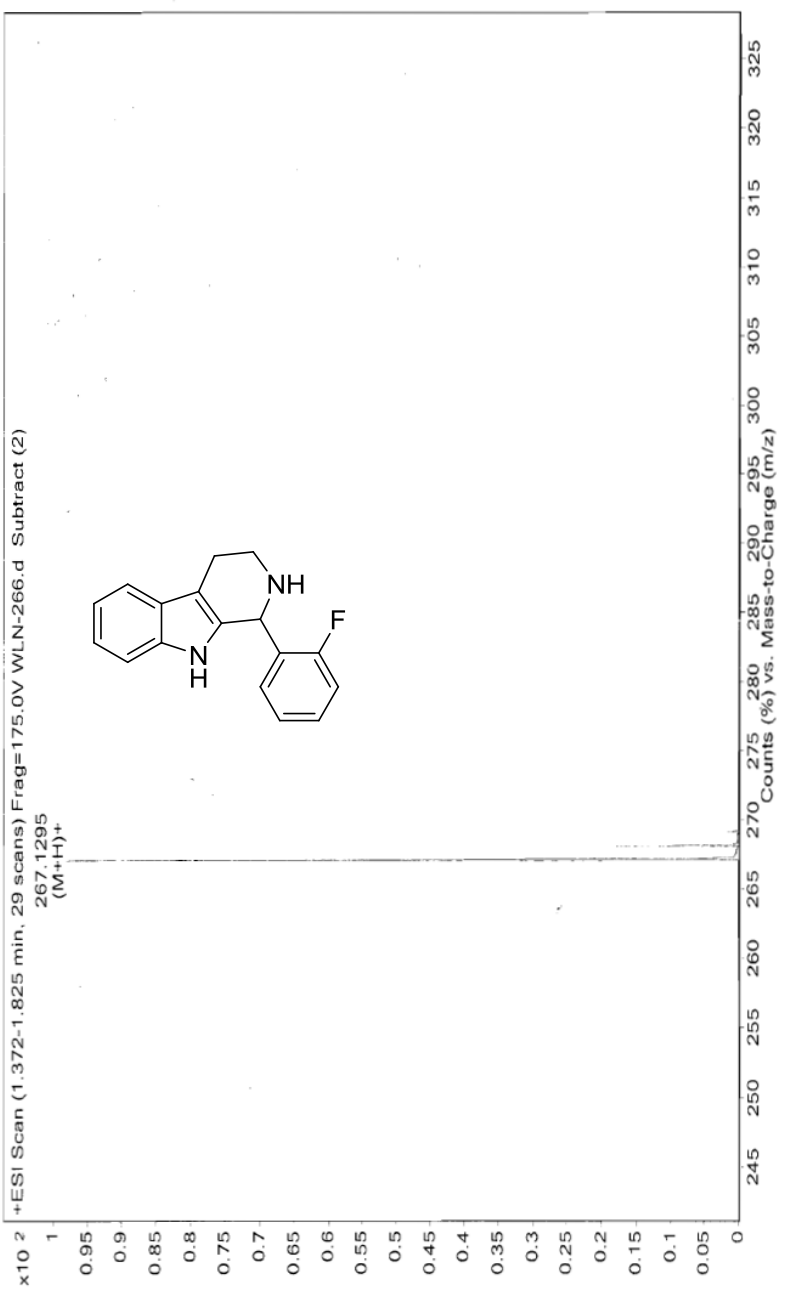

1-(Naphthyl)-1,2,3,4-tetrahydro-β-carboline (3f): HRMS

297.1343

Sample Name: Iq/ms  
 Inj Vol: 1  
 Data Filename: WLN-298.d  
 Position: P1-A2  
 InjPosition: chen-ms.m  
 ACQ Method:  
 Instrument Name: P1-A2  
 SampleType: chen-ms.m  
 Instrument 1: Sample  
 User Name: IRM Calibration Status  
 Acquired Time: 7/9/2013 9:40:11 AM  
 Some Ions Missed

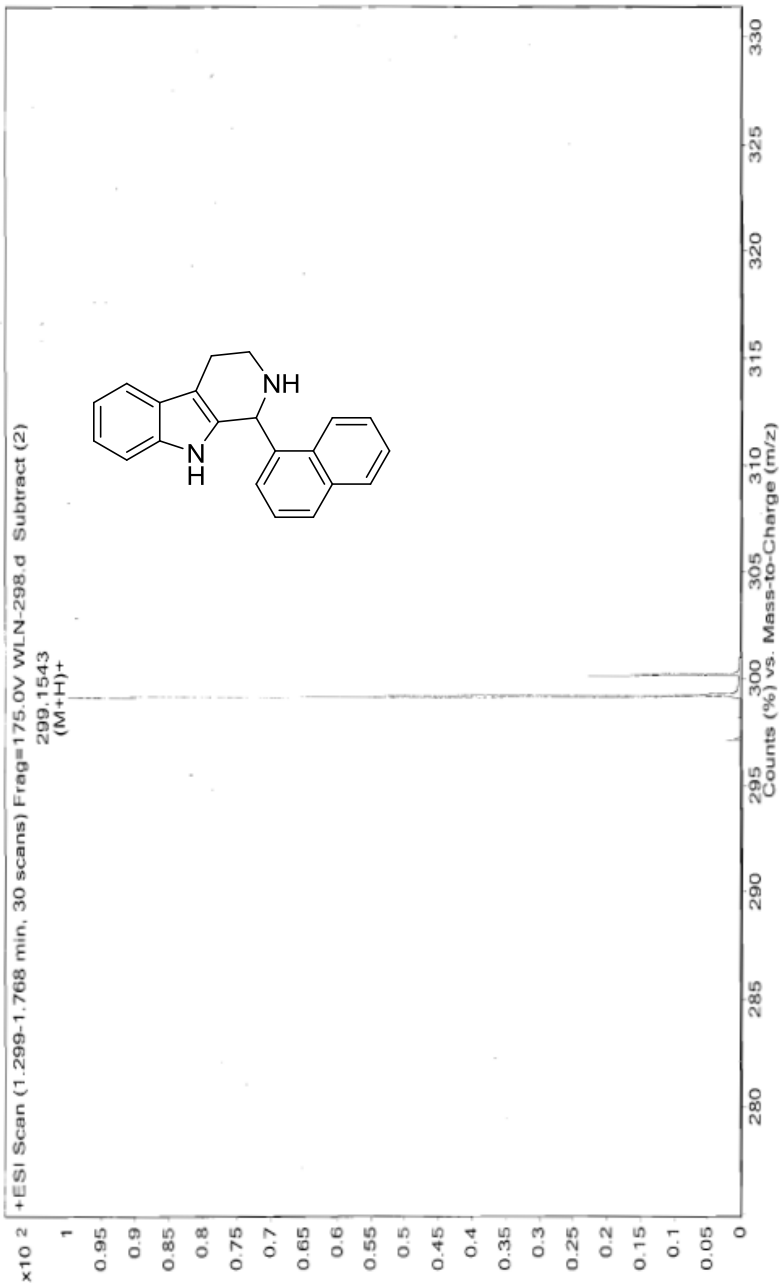

## 1-Phenyl-1-trifluoromethyl-1,2,3,4-tetrahydro-β-carboline (3k): HRMS

|               |               |             |        |                 |             |                        |                     |
|---------------|---------------|-------------|--------|-----------------|-------------|------------------------|---------------------|
| Sample Name   | LC/MS         | Position    | Vial 3 | Instrument Name | QTOF        | User Name              |                     |
| Inj Vol       | -1            | InjPosition |        | SampleType      | Sample      | IRM Calibration Status | Some Ions Missed    |
| Data Filename | CJL-7PS-CF3.d | ACQ Method  |        | Comment         | No:20110414 | Acquired Time          | 4/19/2011 3:04:52 F |

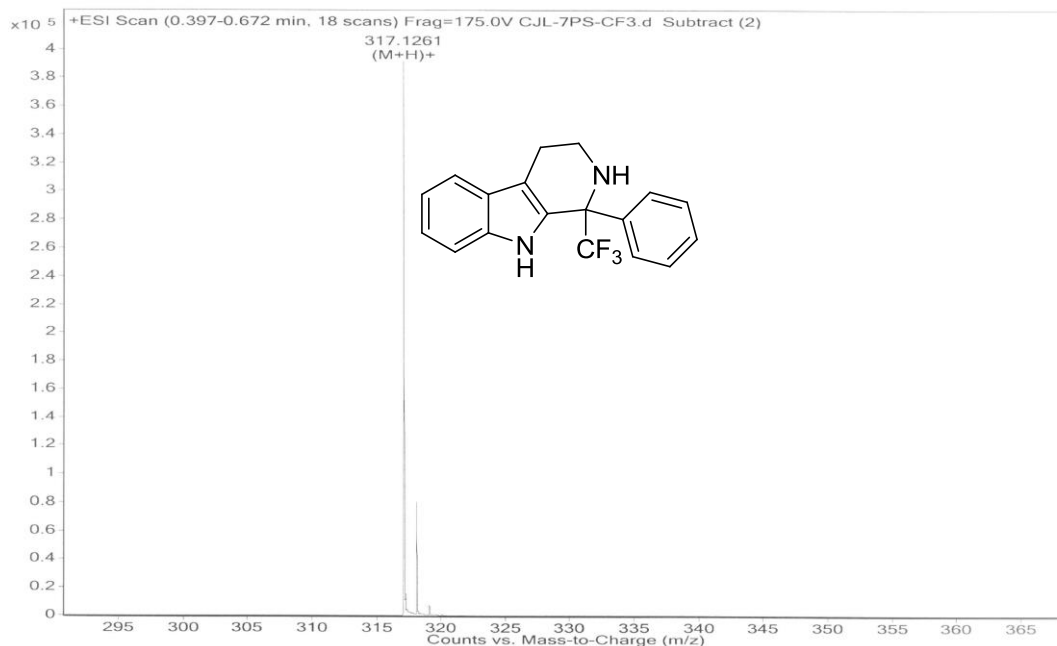

## 1-Methyl-1-(4-nitrophenyl)-1,2,3,4-tetrahydro-β-carboline (3m): HRMS

|               |                     |             |        |                 |             |                        |                     |
|---------------|---------------------|-------------|--------|-----------------|-------------|------------------------|---------------------|
| Sample Name   | LC/MS               | Position    | Vial 3 | Instrument Name | QTOF        | User Name              |                     |
| Inj Vol       | -1                  | InjPosition |        | SampleType      | Sample      | IRM Calibration Status | Some Ions Missed    |
| Data Filename | CJL-7PS-NO2KETONE.d | ACQ Method  |        | Comment         | No:20110414 | Acquired Time          | 4/19/2011 3:00:38 F |

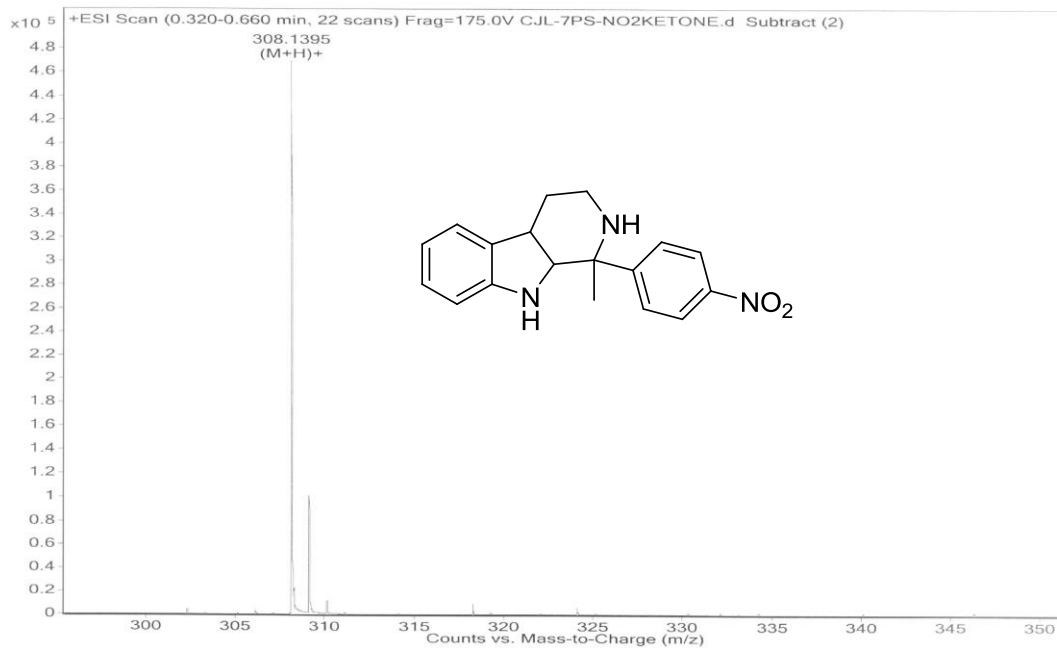

# Ethyl-2-(1-methyl-1,2,3,4-tetrahydro- $\beta$ -carboline-1-yl) acetate (3n): HRMS

|               |                     |             |        |                 |        |                        |                     |
|---------------|---------------------|-------------|--------|-----------------|--------|------------------------|---------------------|
| Sample Name   | LC/MS               | Position    | Vial 3 | Instrument Name | QTOF   | User Name              |                     |
| Inj Vol       | -1                  | InjPosition |        | SampleType      | Sample | IRM Calibration Status | Some Ions Missed    |
| Data Filename | CJL-7-PS-CH2CO2ET.d | ACQ Method  |        | Comment         |        | Acquired Time          | 4/19/2011 3:13:48 P |

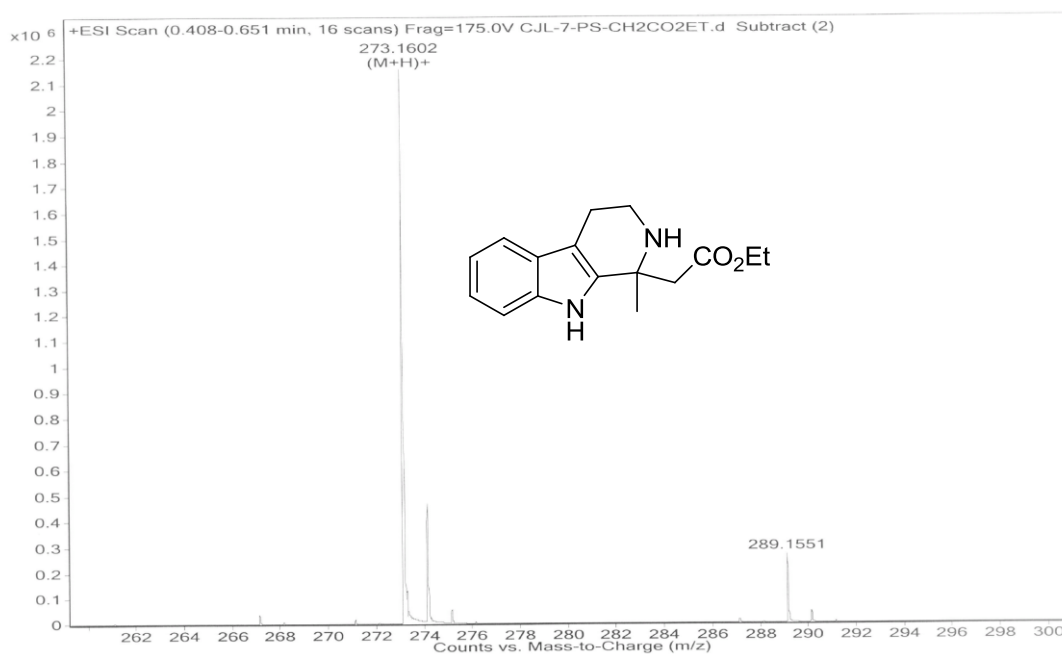

Supplement: c4ra03628j1.pdf [file c4ra03628j1.pdf]
